# Supplementary material
Source: PubMed Central journal article supplement (PMC4177096)
Supplement: NIHMS60458-supplement-supplemental_material.pdf [file NIHMS60458-supplement-supplemental_material.pdf]

# Enhanced function of prefrontal serotonin 5-HT<sub>2</sub> receptors in a rat model of psychiatric vulnerability

Madhurima Benekareddy<sub>1</sub>\*, Nathalie M. Goodfellow<sub>2</sub>\*, Evelyn K. Lambe<sub>2,3</sub><sup>#</sup>, Vidita A. Vaidya<sub>1</sub><sup>#</sup>

## Supplemental information

| <b>Contents</b>                                                                                                                            | <b>Page</b> |
|--------------------------------------------------------------------------------------------------------------------------------------------|-------------|
| Supplemental Figure 1: Input-output relationships from -75mV                                                                               | 2           |
| Supplemental Figure 2: Amplitudes of glutamatergic and GABAergic sPSCs                                                                     | 3           |
| Supplemental Table 1: Proportions of neurons showing 5-HT-elicited increases in glutamatergic or GABAergic sPSCs                           | 4           |
| Supplemental Table 2: List of Genes regulated in the microarray experiment within the prefrontal cortex following early stress (ES vs. C). | 5           |
| Supplemental Table 3: Functional classification of genes regulated by ES in the prefrontal cortex.                                         | 37          |
| Supplemental Table 4: List of Genes regulated in the microarray experiment within the prefrontal cortex following DOI (DOI vs. C).         | 52          |
| Supplemental Table 5: List of Taqman primers used for quantitative PCR (qPCR)                                                              | 90          |
| Supplemental Table 6: List of SYBR green primers used for quantitative PCR (qPCR)                                                          | 91          |

**Supplemental Figure 1:** Input-output relationship from -75mV. Since we found a small but significant difference in the membrane potential of ES layer V pyramidal neurons compared to controls, we also tested the input-output relationship of these cells after bringing each neuron to a membrane potential of -75mV. Under these conditions, there is a trend towards neurons from ES animals being less excitable compared to those from controls (slope of  $5.70 \pm 0.08$  Hz/100 pA in controls [n =14] versus slope of  $5.55 \pm 0.05$  Hz/100 pA [n = 15]; unpaired t test, p = 0.054).

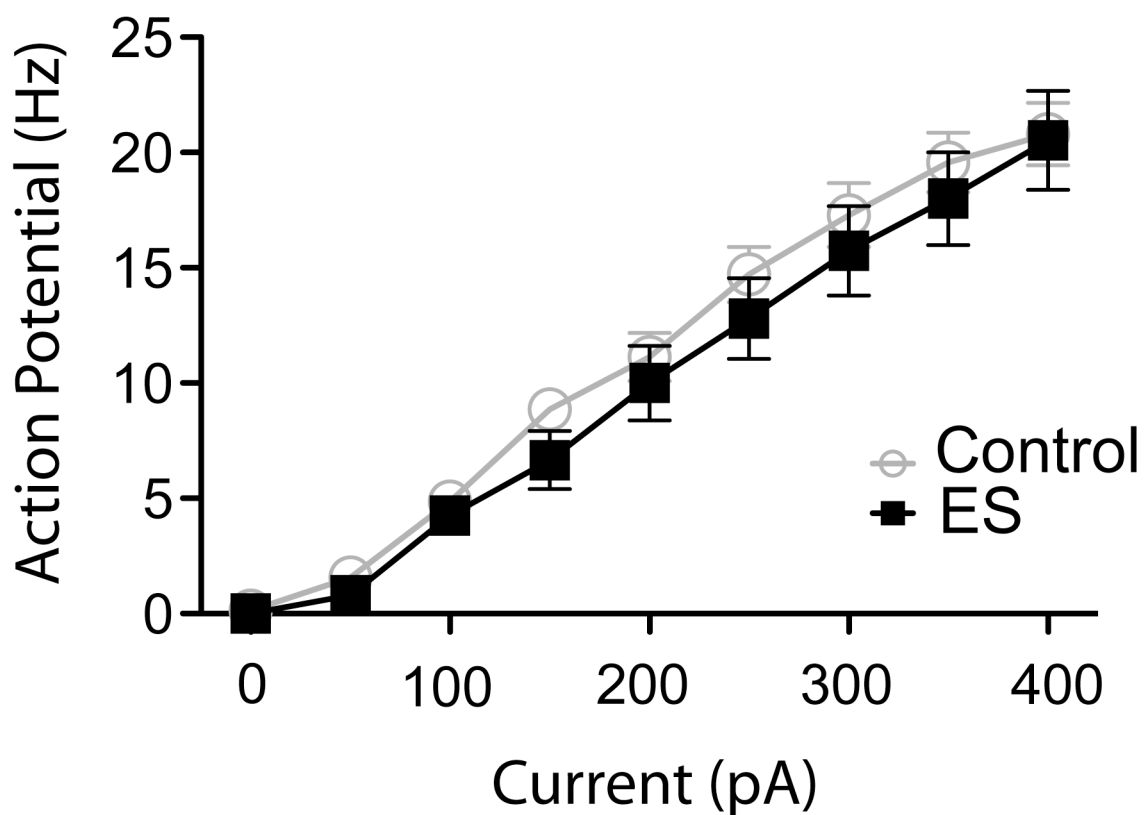

**Supplemental Figure 2:** Amplitudes of glutamatergic and GABAergic sPSCs. (A) The amplitude of glutamatergic spontaneous postsynaptic currents (sPSCs) is not significantly different between neurons from control and ES animals either at baseline or in the presence of 5-HT (10  $\mu$ M, 30 s). (B) The amplitude of GABAergic sPSCs is also not significantly different between neurons from control and ES animals either at baseline or in the presence of 5-HT.

## A Glutamatergic sPSCs

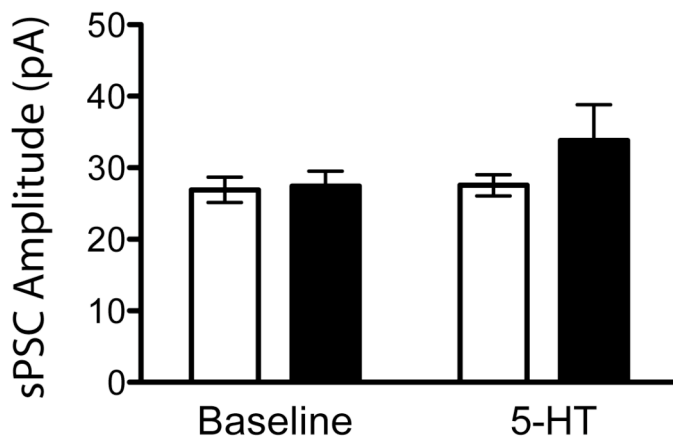

## B GABAergic sPSCs

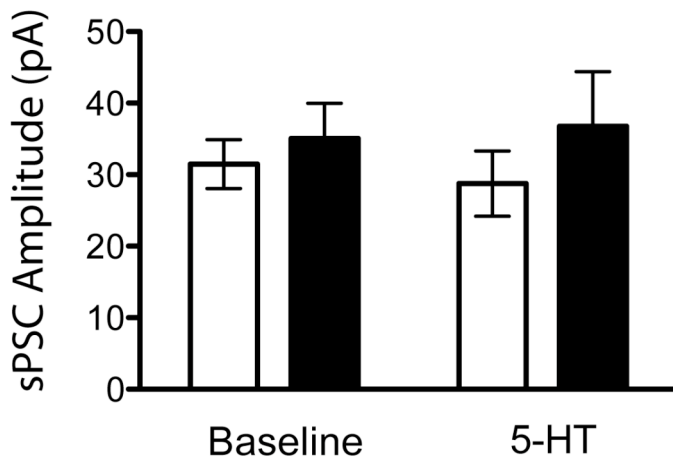

**Supplemental Table 1:** Proportions of neurons showing 5-HT-elicited increases in glutamatergic and GABAergic sPSCs. Early stress (ES) does not alter the proportion of layer V neurons displaying a significant increase in 5-HT-elicited glutamatergic or GABAergic spontaneous postsynaptic currents (sPSCs). Significance in the change in frequency or amplitude of sPSCs within each neuron was assessed by the Kolmogorov-Smirnov test ( $p < 0.01$ ). Comparison between the number of cells displaying significant changes was made with Fisher's exact test.

| <u>Neurons with 5-HT-elicited increases in sPSCs</u> |                | Control        | Early stress (ES) | <i>p</i> value |
|------------------------------------------------------|----------------|----------------|-------------------|----------------|
| Glutamatergic sPSCs                                  | Frequency (Hz) | 13 of 21 (62%) | 14 of 21 (67%)    | 1.0            |
|                                                      | Amplitude (pA) | 4 of 21 (19%)  | 7 of 21 (33%)     | 0.5            |
| GABAergic sPSCs                                      | Frequency (Hz) | 5 of 13 (38%)  | 4 of 13 (31%)     | 1.0            |
|                                                      | Amplitude (pA) | 2 of 13 (15%)  | 4 of 13 (31%)     | 0.6            |

**Supplemental Table 2:** List of Genes regulated in the microarray experiment within the prefrontal cortex(PFC) following early stress (ES vs. C). Animals were subjected to ES and were studied in adulthood as described in Methods. The PFC transcriptome in control and ES animals was analyzed. Shown in the table is the list of all the genes significantly regulated ( $P < 0.05$ ; fold change cut off  $> 1.5$  or  $< 0.66$ ) in the ES group as compared to control.

| GeneName           | Ratio – ES | t-test P-value | Synonyms     | Description                                                                       |
|--------------------|------------|----------------|--------------|-----------------------------------------------------------------------------------|
| A2m                | 1.53       | 0.00           | NM_012488    | alpha-2-macroglobulin                                                             |
| A3galt2            | 2.96       | 0.02           | NM_138524    | alpha 1,3-galactosyltransferase 2 (isoglobotriaosylceramide synthase)             |
| AA858752           | 3.16       | 0.05           | AA858752     | cDNA clone UI-R-A0-bb-e-07-0-UI 3'                                                |
| AA859222           | 1.68       | 0.01           | AA859222     | cDNA clone UI-R-E0-cd-b-07-0-UI 3'                                                |
| AA875523           | 1.56       | 0.01           | AA875523     | cDNA clone UI-R-E0-cv-e-11-0-UI 3'                                                |
| AA899496           | 1.60       | 0.01           | AA899496     | cDNA clone UI-R-E0-de-d-09-0-UI 3'                                                |
| AA925023           | 2.00       | 0.00           | AA925023     | cDNA clone UI-R-A1-ei-g-02-0-UI 3'                                                |
| AA925792           | 1.57       | 0.00           | AA925792     | cDNA clone UI-R-A1-et-f-06-0-UI 3'                                                |
| AA945636           | 1.57       | 0.01           | AA945636     | cDNA clone RLUAR18 3'                                                             |
| Aadac              | 2.04       | 0.04           | NM_020538    | arylacetamide deacetylase (esterase)                                              |
| Abcd3              | 1.60       | 0.02           | NM_012804    | ATP-binding cassette, sub-family D (ALD), member 3                                |
| Abcg2              | 1.69       | 0.00           | NM_181381    | ATP-binding cassette, sub-family G (WHITE), member 2                              |
| Acaa2              | 1.56       | 0.00           | NM_130433    | acetyl-Coenzyme A acyltransferase 2 (mitochondrial 3-oxoacyl-Coenzyme A thiolase) |
| Acads              | 1.67       | 0.01           | NM_022512    | acetyl-Coenzyme A dehydrogenase, short chain                                      |
| Acox1              | 1.67       | 0.01           | NM_017340    | acyl-Coenzyme A oxidase 1, palmitoyl                                              |
| Acs11              | 1.71       | 0.00           | NM_012820    | acyl-CoA synthetase long-chain family member 1                                    |
| Actl6a             | 1.58       | 0.04           | NM_001039033 | actin-like 6A                                                                     |
| Adamts13_predicted | 3.62       | 0.00           | XM_218841    | ADAMTS-like 3 (predicted)                                                         |
| Add2               | 1.55       | 0.02           | NM_012491    | adducin 2 (beta)                                                                  |
| Adm2               | 1.88       | 0.03           | NM_201426    | adrenomedullin 2                                                                  |
| AF486617           | 2.40       | 0.01           | AF486617     | beta-catenin (Ctnnb1) gene, promoter region and exon 1                            |
| Agpat3_predicted   | 1.54       | 0.01           | XM_215367    | 1-acylglycerol-3-phosphate O-acyltransferase 3 (predicted)                        |
| Agt                | 1.76       | 0.00           | NM_134432    | angiotensinogen (serpin peptidase inhibitor, clade A, member 8)                   |
| AI014087           | 2.02       | 0.01           | AI014087     | cDNA clone RSPBE69 3'                                                             |
| AI170772           | 1.84       | 0.02           | AI170772     | cDNA clone RMUBB32 3'                                                             |
| AI229633           | 1.53       | 0.01           | AI229633     | cDNA clone REMCJ67 3'                                                             |

|                   |             |             |                  |                                                                                                |
|-------------------|-------------|-------------|------------------|------------------------------------------------------------------------------------------------|
| Aif1              | <b>1.53</b> | <b>0.03</b> | NM_017196        | allograft inflammatory factor 1                                                                |
| Ak3l1             | <b>2.05</b> | <b>0.03</b> | NM_017135        | adenylate kinase 3-like 1                                                                      |
| Akap8             | <b>1.53</b> | <b>0.01</b> | XM_343176        | A kinase (PRKA) anchor protein 8                                                               |
| Akr1c6            | <b>2.06</b> | <b>0.04</b> | NM_00103369<br>7 | aldo-keto reductase family 1, member C6                                                        |
| Alad              | <b>1.65</b> | <b>0.01</b> | NM_012899        | aminolevulinate, delta-, dehydratase                                                           |
| Aldh7a1           | <b>1.53</b> | <b>0.00</b> | XM_214535        | aldehyde dehydrogenase family 7, member A1                                                     |
| Alg5              | <b>3.33</b> | <b>0.00</b> | NM_00102540<br>7 | asparagine-linked glycosylation 5 homolog (yeast, dolichyl-phosphate beta-glucosyltransferase) |
| Alox5ap           | <b>1.54</b> | <b>0.01</b> | NM_017260        | arachidonate 5-lipoxygenase activating protein                                                 |
| Alx4_predicted    | <b>2.81</b> | <b>0.04</b> | XM_231005        | aristaless 4 (predicted)                                                                       |
| Amelx             | <b>2.25</b> | <b>0.02</b> | NM_019154        | amelogenin X chromosome                                                                        |
| Ankyf1_predicted  | <b>2.18</b> | <b>0.03</b> | XM_239269        | ankyrin repeat and FYVE domain containing 1 (predicted)                                        |
| Ankrd2_predicted  | <b>2.31</b> | <b>0.05</b> | XM_219881        | ankyrin repeat domain 2 (stretch responsive muscle) (predicted)                                |
| Anxa3             | <b>1.51</b> | <b>0.01</b> | NM_012823        | annexin A3                                                                                     |
| Aox1              | <b>2.12</b> | <b>0.04</b> | NM_019363        | aldehyde oxidase 1                                                                             |
| Apobec1           | <b>1.58</b> | <b>0.01</b> | NM_012907        | apolipoprotein B editing complex 1                                                             |
| Apobec2_predicted | <b>1.52</b> | <b>0.00</b> | XM_217334        | apolipoprotein B editing complex 2 (predicted)                                                 |
| Apoc1             | <b>1.52</b> | <b>0.00</b> | NM_012824        | apolipoprotein C-I                                                                             |
| Apoe              | <b>1.66</b> | <b>0.00</b> | NM_138828        | apolipoprotein E                                                                               |
| Apol3             | <b>1.98</b> | <b>0.01</b> | NM_00101317<br>5 | apolipoprotein L, 3                                                                            |
| Aqp3              | <b>2.36</b> | <b>0.03</b> | NM_031703        | aquaporin 3                                                                                    |
| Art5              | <b>2.62</b> | <b>0.01</b> | NM_00101303<br>9 | ADP-ribosyltransferase 5                                                                       |
| Arts1             | <b>1.57</b> | <b>0.01</b> | NM_030836        | type 1 tumor necrosis factor receptor shedding aminopeptidase regulator                        |
| Asah3l_predicted  | <b>2.44</b> | <b>0.02</b> | XM_233138        | N-acylsphingosine amidohydrolase 3-like (predicted)                                            |
| Asgr2             | <b>1.99</b> | <b>0.00</b> | NM_017189        | asialoglycoprotein receptor 2                                                                  |
| Atf5              | <b>1.64</b> | <b>0.04</b> | NM_172336        | activating transcription factor 5                                                              |
| Atp12a            | <b>2.14</b> | <b>0.03</b> | NM_133517        | ATPase, H <sup>+</sup> /K <sup>+</sup> transporting, nongastric, alpha polypeptide             |
| Atp5e             | <b>1.61</b> | <b>0.00</b> | NM_139099        | ATP synthase, H <sup>+</sup> transporting, mitochondrial F1 complex, epsilon subunit           |
| Atp5i             | <b>1.54</b> | <b>0.05</b> | NM_080481        | ATP synthase, H <sup>+</sup> transporting, mitochondrial F0 complex, subunit e                 |
| Atp6v0d2          | <b>2.20</b> | <b>0.03</b> | NM_00101197<br>2 | ATPase, H <sup>+</sup> transporting, V0 subunit D, isoform 2                                   |
| Atp6v0e1          | <b>1.67</b> | <b>0.01</b> | NM_053578        | ATPase, H <sup>+</sup> transporting, V0 subunit E isoform 1                                    |

|                   |             |             |              |                                                                                       |
|-------------------|-------------|-------------|--------------|---------------------------------------------------------------------------------------|
| Atpbd1b_predicted | <b>1.50</b> | <b>0.00</b> | XM_342932    | ATP binding domain 1 family, member B (predicted)                                     |
| Bbox1             | <b>2.13</b> | <b>0.03</b> | NM_022629    | butyrobetaine (gamma), 2-oxoglutarate dioxygenase 1 (gamma-butyrobetaine hydroxylase) |
| Bclaf1            | <b>1.61</b> | <b>0.00</b> | XM_214967    | BCL2-associated transcription factor 1                                                |
| Bglap2            | <b>2.12</b> | <b>0.03</b> | NM_013414    | bone gamma-carboxyglutamate protein 2                                                 |
| Bgn               | <b>1.99</b> | <b>0.01</b> | NM_017087    | biglycan                                                                              |
| Bhlhb8            | <b>2.03</b> | <b>0.04</b> | NM_012863    | basic helix-loop-helix domain containing, class B, 8                                  |
| Bid3              | <b>1.54</b> | <b>0.03</b> | NM_057130    | BH3 interacting (with BCL2 family) domain, apoptosis agonist                          |
| Bpgm              | <b>1.53</b> | <b>0.00</b> | NM_199382    | 2,3-bisphosphoglycerate mutase                                                        |
| BQ201138          | <b>2.24</b> | <b>0.00</b> | BQ201138     | cDNA clone UI-R-DQ1-clt-c-17-0-UI 3'                                                  |
| Brinp2            | <b>1.50</b> | <b>0.04</b> | NM_173115    | BMP/retinoic acid-inducible neural-specific protein 2                                 |
| Brms1             | <b>1.52</b> | <b>0.00</b> | NM_001009605 | breast cancer metastasis-suppressor 1                                                 |
| Bst2              | <b>2.73</b> | <b>0.01</b> | NM_198134    | bone marrow stromal cell antigen 2                                                    |
| Btg4              | <b>2.07</b> | <b>0.04</b> | NM_001013176 | B-cell translocation gene 4                                                           |
| C1qa              | <b>1.63</b> | <b>0.00</b> | NM_001008515 | complement component 1, q subcomponent, alpha polypeptide                             |
| C1qb              | <b>1.73</b> | <b>0.00</b> | NM_019262    | complement component 1, q subcomponent, beta polypeptide                              |
| C1qg              | <b>1.64</b> | <b>0.00</b> | NM_001008524 | complement component 1, q subcomponent, gamma polypeptide                             |
| C1qtnf1           | <b>2.63</b> | <b>0.01</b> | NM_001007675 | C1q and tumor necrosis factor related protein 1                                       |
| C1qtnf6           | <b>2.21</b> | <b>0.05</b> | NM_001034932 | C1q and tumor necrosis factor related protein 6                                       |
| C1r               | <b>1.51</b> | <b>0.02</b> | XM_242644    | complement component 1, r subcomponent                                                |
| C2                | <b>1.68</b> | <b>0.00</b> | NM_172222    | complement component 2                                                                |
| C5                | <b>2.17</b> | <b>0.03</b> | XM_345342    | complement component 5                                                                |
| C6                | <b>2.14</b> | <b>0.03</b> | NM_176074    | complement component 6                                                                |
| Calb2             | <b>1.54</b> | <b>0.00</b> | NM_053988    | calbindin 2                                                                           |
| Calcr             | <b>1.98</b> | <b>0.01</b> | NM_053816    | calcitonin receptor, transcript variant 1                                             |
| Calu              | <b>1.89</b> | <b>0.03</b> | NM_022535    | calumenin                                                                             |
| Camk1g            | <b>1.55</b> | <b>0.01</b> | NM_182842    | calcium/calmodulin-dependent protein kinase I gamma                                   |
| Capn8             | <b>1.99</b> | <b>0.05</b> | NM_133309    | calpain 8                                                                             |
| Caps2_predicted   | <b>2.90</b> | <b>0.04</b> | XM_345822    | calcyphosphine 2 (predicted)                                                          |
| Capzb             | <b>2.02</b> | <b>0.00</b> | NM_001005903 | capping protein (actin filament) muscle Z-line, beta                                  |
| Casp2             | <b>1.53</b> | <b>0.00</b> | NM_022522    | caspase 2                                                                             |
| Cbr1              | <b>1.51</b> | <b>0.00</b> | NM_019170    | carbonyl reductase 1                                                                  |

|                  |             |             |                  |                                                                                           |
|------------------|-------------|-------------|------------------|-------------------------------------------------------------------------------------------|
| Cckar            | <b>3.36</b> | <b>0.00</b> | NM_012688        | cholecystokinin A receptor                                                                |
| Ccl20            | <b>2.01</b> | <b>0.04</b> | NM_019233        | chemokine (C-C motif) ligand 20                                                           |
| Ccl6             | <b>2.79</b> | <b>0.01</b> | NM_00100420<br>2 | chemokine (C-C motif) ligand 6                                                            |
| Ccndbp1          | <b>1.50</b> | <b>0.03</b> | NM_00101320<br>4 | cyclin D-type binding-protein 1                                                           |
| Ccng1            | <b>7.43</b> | <b>0.00</b> | NM_012923        | cyclin G1                                                                                 |
| Ccs              | <b>1.50</b> | <b>0.02</b> | NM_053425        | copper chaperone for superoxide dismutase                                                 |
| Cct3             | <b>2.52</b> | <b>0.00</b> | AA964625         | cDNA clone UI-R-C0-gv-d-10-0-UI 3'                                                        |
| Cd163_predicted  | <b>2.33</b> | <b>0.02</b> | XM_232342        | CD163 antigen (predicted)                                                                 |
| Cd1d1            | <b>1.53</b> | <b>0.01</b> | NM_017079        | CD1d1 antigen                                                                             |
| Cd226_predicted  | <b>2.23</b> | <b>0.02</b> | XM_225664        | CD226 antigen (predicted)                                                                 |
| Cd3g             | <b>1.97</b> | <b>0.04</b> | XM_217136        | CD3 antigen, gamma polypeptide                                                            |
| Cd44             | <b>1.76</b> | <b>0.00</b> | NM_012924        | CD44 antigen                                                                              |
| Cd47             | <b>2.15</b> | <b>0.00</b> | NM_019195        | CD47 antigen (Rh-related antigen, integrin-associated signal transducer)                  |
| Cd48             | <b>1.74</b> | <b>0.01</b> | NM_139103        | CD48 antigen                                                                              |
| Cd63             | <b>1.62</b> | <b>0.00</b> | NM_017125        | CD63 antigen                                                                              |
| Cd82             | <b>1.56</b> | <b>0.02</b> | NM_031797        | CD82 antigen                                                                              |
| Cdc14a_predicted | <b>2.03</b> | <b>0.04</b> | XM_227618        | CDC14 cell division cycle 14 homolog A (S. cerevisiae) (predicted)                        |
| Cdc73            | <b>2.80</b> | <b>0.05</b> | NM_00102476<br>9 | cell division cycle 73, Paf1/RNA polymerase II complex component, homolog (S. cerevisiae) |
| Cdh15            | <b>1.59</b> | <b>0.00</b> | NM_207613        | cadherin 15                                                                               |
| Cdkn1b           | <b>2.57</b> | <b>0.02</b> | NM_031762        | cyclin-dependent kinase inhibitor 1B                                                      |
| Cdtw1            | <b>1.52</b> | <b>0.01</b> | NM_134395        | P11 protein                                                                               |
| Centd3_predicted | <b>2.03</b> | <b>0.04</b> | XM_00106616<br>7 | centaurin, delta 3 (predicted)                                                            |
| Cetn1            | <b>2.17</b> | <b>0.02</b> | BE103209         | cDNA clone UI-R-BT1-aqx-d-09-0-UI 3'                                                      |
| Cfb              | <b>2.41</b> | <b>0.03</b> | NM_212466        | complement factor B                                                                       |
| Cfd              | <b>4.79</b> | <b>0.00</b> | XM_343169        | complement factor D (adipsin)                                                             |
| Cfh              | <b>1.61</b> | <b>0.00</b> | NM_130409        | complement component factor H                                                             |
| Cga              | <b>1.81</b> | <b>0.03</b> | NM_053918        | glycoprotein hormones, alpha subunit                                                      |
| Chaf1b           | <b>1.83</b> | <b>0.04</b> | NM_00102474<br>1 | chromatin assembly factor 1, subunit B (p60)                                              |
| Chgb             | <b>1.50</b> | <b>0.02</b> | NM_012526        | chromogranin B                                                                            |
| Chpt1            | <b>1.60</b> | <b>0.01</b> | NM_00100775<br>0 | choline phosphotransferase 1                                                              |
| Chrn3            | <b>2.13</b> | <b>0.03</b> | NM_133597        | cholinergic receptor, nicotinic, beta polypeptide 3                                       |
| Cib1             | <b>1.64</b> | <b>0.01</b> | NM_031145        | calcium and integrin binding 1 (calmyrin)                                                 |
| Cit              | <b>2.08</b> | <b>0.00</b> | AF039218         | postsynaptic density protein (citron)                                                     |



|                       |             |             |                  |                                                              |
|-----------------------|-------------|-------------|------------------|--------------------------------------------------------------|
| Cklfsf5_pre<br>dicted | <b>1.54</b> | <b>0.02</b> | XM_214187        | chemokine-like factor super family 5 (predicted)             |
| Clasp1                | <b>1.71</b> | <b>0.04</b> | XM_00105371<br>5 | cytoplasmic linker associated protein 1                      |
| Clca6                 | <b>2.03</b> | <b>0.04</b> | NM_201419        | chloride channel calcium activated 6                         |
| Cml3                  | <b>1.52</b> | <b>0.00</b> | XM_575585        | camello-like 3                                               |
| Cml5                  | <b>1.93</b> | <b>0.01</b> | XM_00106061<br>6 | camello-like 5                                               |
| Cnga1                 | <b>2.24</b> | <b>0.02</b> | NM_053497        | cyclic nucleotide gated channel alpha 1                      |
| Cog4_predi<br>cted    | <b>1.63</b> | <b>0.00</b> | XM_341688        | component of oligomeric golgi complex 4<br>(predicted)       |
| Coll5a1               | <b>4.48</b> | <b>0.00</b> | XM_216399        | procollagen, type XV                                         |
| Coll6a1               | <b>3.87</b> | <b>0.01</b> | XM_345584        | procollagen, type XVI, alpha 1                               |
| Cotl1_predi<br>cted   | <b>1.55</b> | <b>0.01</b> | XM_341700        | coactosin-like 1 (Dictyostelium) (predicted)                 |
| Cpb1                  | <b>2.25</b> | <b>0.02</b> | NM_012533        | carboxypeptidase B1 (tissue)                                 |
| CPG2                  | <b>1.96</b> | <b>0.00</b> | AF452647         | nesprin-1                                                    |
| Cpxm2_pre<br>dicted   | <b>1.69</b> | <b>0.03</b> | XM_215106        | carboxypeptidase X 2 (M14 family) (predicted)                |
| CR754507              | <b>1.55</b> | <b>0.00</b> | CR754507         | cDNA clone GP0AAA16ZH02                                      |
| Crry                  | <b>1.57</b> | <b>0.00</b> | NM_00100533<br>0 | complement receptor related protein, transcript<br>variant 1 |
| Cryab                 | <b>1.94</b> | <b>0.04</b> | NM_012935        | crystallin, alpha B                                          |
| Csflr                 | <b>2.25</b> | <b>0.01</b> | X61479           | colony stimulating factor 1 receptor                         |
| Csn10                 | <b>1.95</b> | <b>0.04</b> | NM_031562        | casein kappa                                                 |
| Csng                  | <b>2.07</b> | <b>0.04</b> | XM_341197        | casein gamma                                                 |
| Csnk1g1               | <b>2.00</b> | <b>0.00</b> | NM_022288        | casein kinase 1, gamma 1                                     |
| Cspg2                 | <b>1.81</b> | <b>0.01</b> | XM_215451        | chondroitin sulfate proteoglycan 2                           |
| Csrp2                 | <b>1.62</b> | <b>0.00</b> | NM_177425        | cysteine and glycine-rich protein 2                          |
| Cst3                  | <b>1.56</b> | <b>0.00</b> | NM_012837        | cystatin C                                                   |
| Cst9_predic<br>ted    | <b>2.18</b> | <b>0.03</b> | XM_342537        | cystatin 9 (predicted)                                       |
| Ctrc                  | <b>1.85</b> | <b>0.00</b> | XM_00107320<br>8 | chymotrypsin C (caldecrin)                                   |
| Ctsh                  | <b>1.57</b> | <b>0.01</b> | NM_012939        | cathepsin H                                                  |
| Ctsj                  | <b>2.70</b> | <b>0.04</b> | NM_017121        | cathepsin J                                                  |
| Ctss                  | <b>1.72</b> | <b>0.00</b> | NM_017320        | cathepsin S                                                  |
| Cxcl10                | <b>2.88</b> | <b>0.04</b> | NM_139089        | chemokine (C-X-C motif) ligand 10                            |
| Cxcl14                | <b>1.67</b> | <b>0.00</b> | NM_00101313<br>7 | chemokine (C-X-C motif) ligand 14                            |
| Cyb5                  | <b>2.03</b> | <b>0.00</b> | NM_022245        | cytochrome b-5                                               |
| Cyb5b                 | <b>1.78</b> | <b>0.00</b> | NM_030586        | cytochrome b5, outer mitochondrial membrane<br>isoform       |
| Cyba                  | <b>1.57</b> | <b>0.01</b> | NM_024160        | cytochrome b-245, alpha polypeptide                          |

|                   |             |             |              |                                                                                                                |
|-------------------|-------------|-------------|--------------|----------------------------------------------------------------------------------------------------------------|
| Cybrd1            | <b>1.50</b> | <b>0.01</b> | NM_001011954 | cytochrome b reductase 1                                                                                       |
| Cyp4a14           | <b>2.06</b> | <b>0.04</b> | NM_175760    | cytochrome P450, family 4, subfamily a, polypeptide 14                                                         |
| Cyp4f2            | <b>1.50</b> | <b>0.01</b> | NM_019623    | cytochrome P450, family 4, subfamily F, polypeptide 2                                                          |
| Cysltr1           | <b>2.09</b> | <b>0.03</b> | NM_053641    | cysteinyl leukotriene receptor 1                                                                               |
| Dbi               | <b>1.73</b> | <b>0.01</b> | NM_031853    | diazepam binding inhibitor                                                                                     |
| Dbp               | <b>1.53</b> | <b>0.00</b> | NM_012543    | D site albumin promoter binding protein                                                                        |
| Dcc               | <b>2.09</b> | <b>0.04</b> | NM_012841    | deleted in colorectal carcinoma                                                                                |
| Ddah2             | <b>1.78</b> | <b>0.00</b> | NM_212532    | dimethylarginine dimethylaminohydrolase 2                                                                      |
| Ddc               | <b>1.72</b> | <b>0.00</b> | NM_012545    | dopa decarboxylase                                                                                             |
| Ddx21a            | <b>1.63</b> | <b>0.02</b> | NM_001037201 | DEAD (Asp-Glu-Ala-Asp) box polypeptide 21a                                                                     |
| Ddx4              | <b>2.11</b> | <b>0.03</b> | XM_001074861 | DEAD (Asp-Glu-Ala-Asp) box polypeptide 4                                                                       |
| Decr1             | <b>1.55</b> | <b>0.03</b> | NM_057197    | 2,4-dienoyl CoA reductase 1, mitochondrial                                                                     |
| Defb1             | <b>2.11</b> | <b>0.03</b> | NM_031810    | defensin beta 1                                                                                                |
| Dhrs8             | <b>1.66</b> | <b>0.04</b> | NM_001004209 | dehydrogenase/reductase (SDR family) member 8                                                                  |
| Dnah7             | <b>2.44</b> | <b>0.01</b> | XM_001065965 | dynein, axonemal, heavy polypeptide 7                                                                          |
| Dnase1l3          | <b>1.88</b> | <b>0.04</b> | NM_053907    | deoxyribonuclease I-like 3                                                                                     |
| Dpf3_predicted    | <b>2.07</b> | <b>0.04</b> | XM_238462    | D4, zinc and double PHD fingers, family 3 (predicted)                                                          |
| Drg1              | <b>1.54</b> | <b>0.00</b> | NM_001009685 | developmentally regulated GTP binding protein 1                                                                |
| Dusp22_predicted  | <b>1.54</b> | <b>0.00</b> | XM_341523    | dual specificity phosphatase 22 (predicted)                                                                    |
| Efemp2            | <b>1.50</b> | <b>0.00</b> | NM_001005907 | EGF-containing fibulin-like extracellular matrix protein 2                                                     |
| Egfl7             | <b>1.53</b> | <b>0.00</b> | NM_139104    | EGF-like domain 7                                                                                              |
| Eif2c3_predicted  | <b>3.10</b> | <b>0.03</b> | XM_233543    | eukaryotic translation initiation factor 2C, 3 (predicted)                                                     |
| Eif3s12_predicted | <b>1.58</b> | <b>0.04</b> | XM_214886    | eukaryotic translation initiation factor 3, subunit 12 (predicted)                                             |
| Elk1              | <b>1.54</b> | <b>0.00</b> | BG377323     | cDNA clone UI-R-CU0-bvc-b-03-0-UI 3'                                                                           |
| Emcn              | <b>1.95</b> | <b>0.00</b> | NM_001004228 | endomucin                                                                                                      |
| Emr1              | <b>1.58</b> | <b>0.05</b> | NM_001007557 | EGF-like module containing, mucin-like, hormone receptor-like sequence 1                                       |
| Enpp1             | <b>1.56</b> | <b>0.02</b> | NM_053535    | ectonucleotide pyrophosphatase/phosphodiesterase 1                                                             |
| ErbB2             | <b>1.54</b> | <b>0.01</b> | NM_017003    | v-erb-b2 erythroblastic leukemia viral oncogene homolog 2, neuro/glioblastoma derived oncogene homolog (avian) |

|                  |             |             |              |                                                                         |
|------------------|-------------|-------------|--------------|-------------------------------------------------------------------------|
| Exosc5_predicted | <b>1.53</b> | <b>0.00</b> | XM_218343    | exosome component 5 (predicted)                                         |
| Exosc8_predicted | <b>1.97</b> | <b>0.05</b> | XM_215566    | exosome component 8 (predicted)                                         |
| Fabp5            | <b>1.52</b> | <b>0.01</b> | NM_145878    | fatty acid binding protein 5, epidermal                                 |
| Fads2            | <b>1.53</b> | <b>0.01</b> | NM_031344    | fatty acid desaturase 2                                                 |
| Fath2            | <b>2.19</b> | <b>0.02</b> | NM_022954    | fat tumor suppressor homolog 2 (Drosophila)                             |
| Fbxo5_predicted  | <b>2.10</b> | <b>0.04</b> | XM_214756    | F-box only protein 5 (predicted)                                        |
| Fcgr1            | <b>2.23</b> | <b>0.00</b> | AF416291     | high-affinity immunoglobulin gamma Fc receptor I                        |
| Fcgr3            | <b>1.82</b> | <b>0.01</b> | XM_001077008 | Fc receptor, IgG, low affinity III                                      |
| Fcgr3a           | <b>1.52</b> | <b>0.01</b> | NM_207603    | Fc fragment of IgG, low affinity IIIa, receptor                         |
| Fcna             | <b>2.37</b> | <b>0.00</b> | NM_031348    | ficolin A                                                               |
| Fez2             | <b>1.61</b> | <b>0.01</b> | NM_053600    | fasciculation and elongation protein zeta 2 (zygin II)                  |
| Fgg              | <b>2.68</b> | <b>0.01</b> | NM_012559    | fibrinogen, gamma polypeptide                                           |
| Fnta             | <b>1.52</b> | <b>0.00</b> | NM_012847    | farnesyltransferase, CAAX box, alpha                                    |
| Fxyd6            | <b>1.54</b> | <b>0.00</b> | NM_022005    | FXDYD domain-containing ion transport regulator 6                       |
| G0s2             | <b>1.64</b> | <b>0.00</b> | NM_001009632 | G0/G1 switch gene 2                                                     |
| G1p2_predicted   | <b>5.06</b> | <b>0.01</b> | XM_216605    | interferon, alpha-inducible protein (clone IFI-15K) (predicted)         |
| Gab1_predicted   | <b>2.27</b> | <b>0.05</b> | XM_341667    | growth factor receptor bound protein 2-associated protein 1 (predicted) |
| Gabarap          | <b>1.57</b> | <b>0.00</b> | NM_172036    | gamma-aminobutyric acid receptor associated protein                     |
| Gabbr1           | <b>2.08</b> | <b>0.01</b> | NM_017291    | gamma-aminobutyric acid (GABA-C) receptor, subunit rho 1                |
| Gamt             | <b>1.92</b> | <b>0.02</b> | NM_012793    | guanidinoacetate methyltransferase                                      |
| Gbp2             | <b>2.32</b> | <b>0.01</b> | NM_133624    | guanylate nucleotide binding protein 2                                  |
| Gimap1           | <b>1.51</b> | <b>0.02</b> | NM_001034849 | GTPase, IMAP family member 1                                            |
| Gjb3             | <b>1.94</b> | <b>0.05</b> | NM_019240    | gap junction membrane channel protein beta 3                            |
| Gjb6             | <b>1.59</b> | <b>0.00</b> | NM_053388    | gap junction membrane channel protein beta 6                            |
| Gmfg             | <b>1.67</b> | <b>0.04</b> | NM_181091    | glia maturation factor, gamma                                           |
| Gml_predicted    | <b>2.86</b> | <b>0.01</b> | XM_235422    | GPI anchored molecule like protein (predicted) (Gml_predicted)          |
| Gnat2_predicted  | <b>2.32</b> | <b>0.02</b> | XM_345271    | guanine nucleotide binding protein, alpha transducing 2 (predicted)     |
| Gpnmb            | <b>1.62</b> | <b>0.02</b> | NM_133298    | glycoprotein (transmembrane) nmb                                        |
| Gpr176           | <b>3.33</b> | <b>0.02</b> | XM_342493    | G protein-coupled receptor 176                                          |
| Gpx4             | <b>1.67</b> | <b>0.00</b> | NM_017165    | glutathione peroxidase 4, transcript variant 1                          |
| Grin2d           | <b>1.89</b> | <b>0.00</b> | NM_022797    | glutamate receptor, ionotropic, N-methyl D-aspartate 2D                 |

|                     |             |             |              |                                                       |
|---------------------|-------------|-------------|--------------|-------------------------------------------------------|
| Grp                 | <b>1.63</b> | <b>0.00</b> | NM_133570    | gastrin releasing peptide                             |
| Gss                 | <b>1.55</b> | <b>0.00</b> | NM_012962    | glutathione synthetase                                |
| Gsta4               | <b>1.54</b> | <b>0.00</b> | XM_217195    | glutathione S-transferase, alpha 4                    |
| Gstm6_predicted     | <b>1.96</b> | <b>0.05</b> | XM_215682    | glutathione S-transferase, mu 6 (predicted)           |
| Gstt2               | <b>1.53</b> | <b>0.04</b> | NM_012796    | glutathione S-transferase, theta 2                    |
| Gucy2c              | <b>2.42</b> | <b>0.02</b> | NM_013170    | guanylate cyclase 2C                                  |
| Gys2                | <b>2.31</b> | <b>0.02</b> | NM_013089    | glycogen synthase 2                                   |
| Gzmm                | <b>1.78</b> | <b>0.00</b> | XM_001076783 | granzyme M (lymphocyte met-ase 1)                     |
| H2a                 | <b>1.50</b> | <b>0.00</b> | NM_021840    | histone 2a                                            |
| Hadha               | <b>1.98</b> | <b>0.03</b> | AA800240     | cDNA clone RHEAM82 3' end                             |
| Hadhsc              | <b>2.06</b> | <b>0.05</b> | NM_057186    | L-3-hydroxyacyl-Coenzyme A dehydrogenase, short chain |
| Hao1_mapped         | <b>2.49</b> | <b>0.05</b> | XM_230613    | hydroxyacid oxidase 1 (mapped)                        |
| Hig1                | <b>1.53</b> | <b>0.00</b> | NM_080902    | hypoxia induced gene 1                                |
| Hist1h2ao_predicted | <b>1.56</b> | <b>0.00</b> | XM_344599    | histone 1, H2ao (predicted)                           |
| Hist2h2aa_predicted | <b>1.58</b> | <b>0.00</b> | XM_345255    | histone 2, H2aa (predicted)                           |
| Hnrpm               | <b>1.56</b> | <b>0.00</b> | NM_053876    | heterogeneous nuclear ribonucleoprotein M             |
| Homez               | <b>2.71</b> | <b>0.02</b> | NM_152849    | homeodomain leucine zipper-encoding gene              |
| Hoxc12_predicted    | <b>2.94</b> | <b>0.04</b> | XM_235696    | homeo box C12 (predicted)                             |
| Hsd11b1             | <b>1.56</b> | <b>0.00</b> | NM_017080    | hydroxysteroid 11-beta dehydrogenase 1                |
| Hsd17b12            | <b>1.74</b> | <b>0.00</b> | NM_032066    | hydroxysteroid (17-beta) dehydrogenase 12             |
| Hspa1a              | <b>1.52</b> | <b>0.04</b> | NM_031971    | heat shock 70kD protein 1A                            |
| Iag2                | <b>1.86</b> | <b>0.00</b> | NM_053946    | implantation-associated protein                       |
| Icos                | <b>3.11</b> | <b>0.03</b> | NM_022610    | inducible T-cell co-stimulator                        |
| Id3                 | <b>1.97</b> | <b>0.00</b> | NM_013058    | inhibitor of DNA binding 3                            |
| Idh3B               | <b>2.66</b> | <b>0.00</b> | NM_053581    | isocitrate dehydrogenase 3 (NAD+) beta                |
| Ifi44               | <b>2.89</b> | <b>0.03</b> | XM_227821    | interferon-induced protein 44                         |
| Igfbp6              | <b>1.69</b> | <b>0.00</b> | NM_013104    | insulin-like growth factor binding protein 6          |
| Igsf1               | <b>2.32</b> | <b>0.02</b> | NM_175763    | immunoglobulin superfamily, member 1                  |
| Il17rb_predicted    | <b>2.06</b> | <b>0.04</b> | XM_224604    | interleukin 17 receptor B (predicted)                 |
| Il1f8_predicted     | <b>2.19</b> | <b>0.03</b> | XM_342377    | interleukin 1 family, member 8 (predicted)            |
| Il2                 | <b>2.00</b> | <b>0.04</b> | NM_053836    | interleukin 2                                         |
| Il20ra_predicted    | <b>2.27</b> | <b>0.02</b> | XM_218776    | interleukin 20 receptor, alpha (predicted)            |
| Il5ra               | <b>2.11</b> | <b>0.03</b> | NM_053645    | interleukin 5 receptor, alpha                         |
| Impa1               | <b>2.27</b> | <b>0.00</b> | NM_032057    | Inositol (myo)-1(or 4)-monophosphatase 1              |

|                   |             |             |                  |                                                                      |
|-------------------|-------------|-------------|------------------|----------------------------------------------------------------------|
| Inhbc             | <b>2.05</b> | <b>0.02</b> | NM_022614        | inhibin beta C                                                       |
| Inpp5e            | <b>2.64</b> | <b>0.00</b> | XM_342391        | inositol polyphosphate 5-phosphatase                                 |
| Insr              | <b>2.24</b> | <b>0.00</b> | NM_017071        | insulin receptor                                                     |
| Irf7              | <b>5.20</b> | <b>0.01</b> | NM_00103369<br>1 | interferon regulatory factor 7                                       |
| Irgm              | <b>1.90</b> | <b>0.01</b> | NM_00101200<br>7 | immunity-related GTPase family, M                                    |
| Isg20             | <b>1.93</b> | <b>0.01</b> | NM_00100851<br>0 | interferon stimulated exonuclease 20                                 |
| Isgf3g            | <b>1.75</b> | <b>0.01</b> | NM_00101204<br>1 | interferon dependent positive acting transcription factor 3 gamma    |
| Isoc1             | <b>1.52</b> | <b>0.05</b> | NM_00101424<br>2 | isochorismatase domain containing 1                                  |
| Itih1_predicted   | <b>3.25</b> | <b>0.03</b> | XM_224609        | inter-alpha trypsin inhibitor, heavy chain 1 (predicted)             |
| Itih4             | <b>1.99</b> | <b>0.04</b> | NM_019369        | inter alpha-trypsin inhibitor, heavy chain 4                         |
| Kazald1           | <b>1.53</b> | <b>0.01</b> | NM_00103306<br>4 | Kazal-type serine peptidase inhibitor domain 1                       |
| Kcnh2             | <b>2.16</b> | <b>0.04</b> | NM_053949        | potassium voltage-gated channel, subfamily H (eag-related), member 2 |
| Kcnj2             | <b>2.09</b> | <b>0.04</b> | NM_017296        | potassium inwardly-rectifying channel, subfamily J, member 2         |
| Kl                | <b>1.94</b> | <b>0.05</b> | NM_031336        | Klotho                                                               |
| Klf4              | <b>1.51</b> | <b>0.03</b> | NM_053713        | Kruppel-like factor 4                                                |
| Klf5              | <b>2.52</b> | <b>0.01</b> | NM_053394        | Kruppel-like factor 5                                                |
| Klrd1             | <b>1.91</b> | <b>0.05</b> | NM_012745        | killer cell lectin-like receptor, subfamily D, member 1              |
| Lama5             | <b>1.75</b> | <b>0.00</b> | XM_215963        | laminin, alpha 5                                                     |
| Laptm4a           | <b>1.76</b> | <b>0.00</b> | NM_199384        | lysosomal-associated protein transmembrane 4A                        |
| Laptm5            | <b>1.55</b> | <b>0.00</b> | NM_053538        | lysosomal-associated protein transmembrane 5                         |
| Lcn7              | <b>1.58</b> | <b>0.02</b> | NM_053582        | lipocalin 7                                                          |
| Lcp1              | <b>1.70</b> | <b>0.04</b> | NM_00101204<br>4 | lymphocyte cytosolic protein 1                                       |
| Ldlrad3_predicted | <b>3.43</b> | <b>0.03</b> | XM_345406        | similar to hypothetical protein LOC143458                            |
| Lect1             | <b>2.20</b> | <b>0.02</b> | NM_030854        | leukocyte cell derived chemotaxin 1                                  |
| Lect2_predicted   | <b>2.02</b> | <b>0.04</b> | XM_341486        | leukocyte cell-derived chemotaxin 2 (predicted)                      |
| Lep               | <b>2.40</b> | <b>0.00</b> | NM_013076        | leptin                                                               |
| Lepr              | <b>2.24</b> | <b>0.00</b> | NM_012596        | leptin receptor                                                      |
| Leprel            | <b>1.68</b> | <b>0.00</b> | NM_053667        | leprecan 1                                                           |
| Leprel2_predicted | <b>2.73</b> | <b>0.05</b> | XM_216278        | leprecan-like 2 (predicted)                                          |
| Leprot            | <b>1.70</b> | <b>0.04</b> | NM_020099        | leptin receptor overlapping transcript                               |
| Lgals1            | <b>2.05</b> | <b>0.01</b> | NM_019904        | lectin, galactose binding, soluble 1                                 |

|           |             |             |              |                                                                                                                                                                                                   |
|-----------|-------------|-------------|--------------|---------------------------------------------------------------------------------------------------------------------------------------------------------------------------------------------------|
| Lgals3bp  | <b>1.85</b> | <b>0.01</b> | NM_139096    | lectin, galactoside-binding, soluble, 3 binding protein                                                                                                                                           |
| Lgals5    | <b>1.94</b> | <b>0.00</b> | NM_012976    | lectin, galactose binding, soluble 5                                                                                                                                                              |
| Lhx3      | <b>1.75</b> | <b>0.02</b> | XM_001059910 | LIM homeobox protein 3                                                                                                                                                                            |
| Limk2     | <b>2.08</b> | <b>0.05</b> | NM_024135    | LIM motif-containing protein kinase 2                                                                                                                                                             |
| LOC191574 | <b>3.10</b> | <b>0.03</b> | NM_138547    | 3-alpha-hydroxysteroid dehydrogenase                                                                                                                                                              |
| LOC266771 | <b>2.85</b> | <b>0.05</b> | NM_153729    | putative pheromone receptor VN6                                                                                                                                                                   |
| LOC290549 | <b>1.63</b> | <b>0.01</b> | NM_207589    | heat shock protein                                                                                                                                                                                |
| LOC498185 | <b>1.83</b> | <b>0.00</b> | NM_001017488 | similar to sodium/calcium exchanger protein                                                                                                                                                       |
| LOC499924 | <b>2.43</b> | <b>0.01</b> | XM_575268    | Long palate, lung and nasal epithelium carcinoma associated protein 3                                                                                                                             |
| LOC679437 | <b>1.62</b> | <b>0.00</b> | XM_001056340 | similar to solute carrier family 25, member 28                                                                                                                                                    |
| LOC680097 | <b>2.26</b> | <b>0.00</b> | XM_001055696 | similar to germinal histone H4 gene                                                                                                                                                               |
| LOC680174 | <b>2.23</b> | <b>0.03</b> | XM_001056002 | similar to seminal vesicle antigen-like 1                                                                                                                                                         |
| LOC680404 | <b>1.55</b> | <b>0.02</b> | XM_001057045 | similar to Complement C1q-like protein 3 precursor                                                                                                                                                |
| LOC680423 | <b>1.60</b> | <b>0.00</b> | XM_001057104 | similar to Ancient ubiquitous protein 1 precursor                                                                                                                                                 |
| LOC680945 | <b>1.56</b> | <b>0.00</b> | XM_001059596 | similar to stromal cell-derived factor 2-like 1                                                                                                                                                   |
| LOC681314 | <b>1.51</b> | <b>0.00</b> | XM_001061020 | similar to BAX protein, cytoplasmic isoform delta, transcript variant 2                                                                                                                           |
| LOC681867 | <b>1.66</b> | <b>0.00</b> | XM_001056889 | similar to NADH-ubiquinone oxidoreductase PDSW subunit (Complex I-PDSW) (CI-PDSW), transcript variant 2                                                                                           |
| LOC681942 | <b>1.54</b> | <b>0.00</b> | XM_001059166 | similar to Ubiquitin-conjugating enzyme E2 I (Ubiquitin-protein ligase I) (Ubiquitin carrier protein I) (SUMO-1-protein ligase) (SUMO-1-conjugating enzyme) (Ubiquitin-conjugating enzyme UbcE2A) |
| LOC683383 | <b>1.78</b> | <b>0.01</b> | XM_001063050 | similar to vang, van gogh-like 1, transcript variant 1                                                                                                                                            |
| LOC683917 | <b>1.64</b> | <b>0.00</b> | XM_001068997 | similar to gamma-aminobutyric acid (GABA(A)) receptor-associated protein-like 1                                                                                                                   |
| LOC687008 | <b>1.61</b> | <b>0.01</b> | XM_001075496 | similar to Propionyl-CoA carboxylase alpha chain, mitochondrial precursor (PCCase alpha subunit) (Propanoyl-CoA:carbon dioxide ligase alpha subunit)                                              |
| LOC689116 | <b>1.91</b> | <b>0.03</b> | XM_001064621 | similar to nuclear cap binding protein subunit 2, transcript variant 4                                                                                                                            |
| LOC689377 | <b>2.48</b> | <b>0.04</b> | XM_001070580 | similar to Ras-related protein Rab-20                                                                                                                                                             |

|                  |             |             |                  |                                                                                                    |
|------------------|-------------|-------------|------------------|----------------------------------------------------------------------------------------------------|
| LOC691098        | <b>1.67</b> | <b>0.02</b> | XM_00107243<br>3 | similar to ribosomal protein L37                                                                   |
| Loxl1            | <b>1.63</b> | <b>0.02</b> | NM_00101212<br>5 | lysyl oxidase-like 1                                                                               |
| Ltb              | <b>1.51</b> | <b>0.00</b> | NM_212507        | lymphotoxin B                                                                                      |
| Ltb4dh           | <b>1.57</b> | <b>0.01</b> | NM_138863        | leukotriene B4 12-hydroxydehydrogenase                                                             |
| Lum              | <b>2.94</b> | <b>0.00</b> | NM_031050        | lumican                                                                                            |
| M61004           | <b>1.96</b> | <b>0.00</b> | M61004           | Rat transforming oncogene neu, 5' end                                                              |
| Mapk8            | <b>1.70</b> | <b>0.01</b> | XM_341399        | mitogen-activated protein kinase 8 (Mapk8)                                                         |
| Mc4r             | <b>1.86</b> | <b>0.00</b> | NM_013099        | melanocortin 4 receptor                                                                            |
| Mcam             | <b>2.44</b> | <b>0.01</b> | NM_023983        | melanoma cell adhesion molecule, transcript variant 1                                              |
| Mcp              | <b>2.12</b> | <b>0.03</b> | NM_019190        | membrane cofactor protein                                                                          |
| Mcpt1            | <b>2.15</b> | <b>0.01</b> | U67915           | mast cell protease 1 precursor                                                                     |
| Mcpt8            | <b>2.07</b> | <b>0.01</b> | NM_021598        | mast cell protease 8                                                                               |
| Mcsp             | <b>1.99</b> | <b>0.04</b> | NM_031536        | mitochondrial capsule selenoprotein                                                                |
| Mdm4             | <b>1.98</b> | <b>0.05</b> | NM_00101202<br>6 | transformed mouse 3T3 cell double minute 4                                                         |
| Megf10           | <b>3.04</b> | <b>0.04</b> | XM_238019        | Megf10 protein                                                                                     |
| Meox2            | <b>2.04</b> | <b>0.04</b> | NM_017149        | mesenchyme homeobox 2                                                                              |
| Metrn            | <b>1.65</b> | <b>0.01</b> | NM_00100996<br>2 | meteorin, glial cell differentiation regulator                                                     |
| Mfng             | <b>1.51</b> | <b>0.00</b> | NM_199110        | manic fringe homolog                                                                               |
| Mgat4c_predicted | <b>1.52</b> | <b>0.03</b> | XM_235099        | mannosyl (alpha-1,3-)-glycoprotein beta-1,4-N-acetylglucosaminyltransferase, isozyme C (predicted) |
| MGC10560<br>1    | <b>1.68</b> | <b>0.00</b> | NM_00100962<br>0 | similar to hypothetical protein FLJ20898                                                           |
| MGC10874<br>7    | <b>2.98</b> | <b>0.04</b> | NM_00100962<br>8 | similar to alpha-1 major acute phase protein prepeptide                                            |
| MGC10882<br>7    | <b>2.13</b> | <b>0.03</b> | NM_00101749<br>1 | similar to RIKEN cDNA E430019B13                                                                   |
| MGC10951<br>9    | <b>2.58</b> | <b>0.02</b> | NM_00102434<br>5 | similar to tropomyosin 1, embryonic fibroblast                                                     |
| MGC72957         | <b>1.72</b> | <b>0.00</b> | NM_212510        | similar to 60S ribosomal protein L18a                                                              |
| Mgl1             | <b>5.10</b> | <b>0.00</b> | NM_022393        | macrophage galactose N-acetyl-galactosamine specific lectin 1                                      |
| Mgp              | <b>2.04</b> | <b>0.03</b> | NM_012862        | matrix Gla protein                                                                                 |
| Mmp7             | <b>2.08</b> | <b>0.04</b> | NM_012864        | matrix metalloproteinase 7                                                                         |
| Mos              | <b>2.02</b> | <b>0.04</b> | NM_020102        | v-mos moloney murine sarcoma viral oncogene homolog                                                |
| Mpp4             | <b>1.75</b> | <b>0.00</b> | AB030501         | DLG6 gamma                                                                                         |
| Mrgprb2          | <b>2.48</b> | <b>0.04</b> | NM_00100228<br>5 | MAS-related G protein-coupled receptor, member B2                                                  |

|                   |             |             |              |                                                                            |
|-------------------|-------------|-------------|--------------|----------------------------------------------------------------------------|
| Mrpl37            | <b>1.53</b> | <b>0.01</b> | NM_001004235 | mitochondrial ribosomal protein L37                                        |
| Mrpl43_predicted  | <b>2.67</b> | <b>0.00</b> | XM_219938    | mitochondrial ribosomal protein L43 (predicted)                            |
| Mrps25            | <b>1.58</b> | <b>0.01</b> | NM_001025408 | mitochondrial ribosomal protein S25 (                                      |
| Mrps27_predicted  | <b>1.64</b> | <b>0.00</b> | XM_342180    | mitochondrial ribosomal protein S27 (predicted)                            |
| Ms4a2             | <b>2.06</b> | <b>0.04</b> | NM_012845    | membrane-spanning 4-domains, subfamily A, member 2                         |
| Ms4a6b            | <b>2.34</b> | <b>0.00</b> | NM_001006975 | membrane-spanning 4-domains, subfamily A, member 6B                        |
| Msn               | <b>2.15</b> | <b>0.05</b> | NM_030863    | moesin                                                                     |
| Mss4              | <b>2.04</b> | <b>0.01</b> | NM_001007678 | Mss4 protein                                                               |
| Mst1              | <b>2.00</b> | <b>0.04</b> | NM_024352    | Macrophage stimulating 1 (hepatocyte growth factor-like)                   |
| Mt1a              | <b>1.60</b> | <b>0.00</b> | NM_138826    | metallothionein 1a                                                         |
| Mt3               | <b>1.56</b> | <b>0.00</b> | NM_053968    | metallothionein 3                                                          |
| Mtch1             | <b>1.80</b> | <b>0.00</b> | XM_215358    | mitochondrial carrier homolog 1                                            |
| Mx1               | <b>2.73</b> | <b>0.04</b> | NM_173096    | myxovirus (influenza virus) resistance 1                                   |
| Mx2               | <b>1.97</b> | <b>0.04</b> | NM_134350    | myxovirus (influenza virus) resistance 2                                   |
| Mycs              | <b>2.11</b> | <b>0.05</b> | NM_021837    | myc-like oncogene, s-myc protein                                           |
| Myh10             | <b>2.19</b> | <b>0.04</b> | NM_031520    | myosin, heavy polypeptide 10, non-muscle                                   |
| Myl9_predicted    | <b>2.03</b> | <b>0.00</b> | XM_215905    | myosin, light polypeptide 9, regulatory (predicted)                        |
| Myo1e             | <b>2.56</b> | <b>0.04</b> | NM_173101    | myosin IE                                                                  |
| Nalp6             | <b>1.96</b> | <b>0.05</b> | XM_577848    | NACHT, leucine rich repeat and PYD containing 6                            |
| Nckap11_predicted | <b>1.52</b> | <b>0.01</b> | XM_235709    | NCK associated protein 1 like (predicted)                                  |
| Ndrp2             | <b>1.81</b> | <b>0.01</b> | NM_133583    | N-myc downstream regulated gene 2                                          |
| Ndufa12_predicted | <b>1.54</b> | <b>0.02</b> | XM_216880    | NADH dehydrogenase (ubiquinone) 1 alpha subcomplex, 12 (predicted)         |
| Ndufa7_predicted  | <b>1.50</b> | <b>0.04</b> | XM_216859    | NADH dehydrogenase (ubiquinone) 1 alpha subcomplex, 7 (B14.5a) (predicted) |
| Ndufb3_predicted  | <b>1.59</b> | <b>0.00</b> | XM_217400    | NADH dehydrogenase (ubiquinone) 1 beta subcomplex 3 (predicted)            |
| Ndufb4            | <b>1.57</b> | <b>0.04</b> | NM_001037338 | NADH dehydrogenase (ubiquinone) 1 beta subcomplex, 4, 15kDa                |
| Ndufb8_predicted  | <b>1.64</b> | <b>0.01</b> | XM_215269    | NADH dehydrogenase (ubiquinone) 1 beta subcomplex 8 (predicted)            |
| Ndufb9_predicted  | <b>1.55</b> | <b>0.02</b> | XM_216929    | NADH dehydrogenase (ubiquinone) 1 beta subcomplex, 9 (predicted)           |
| Necap2            | <b>1.50</b> | <b>0.00</b> | NM_199096    | NECAP endocytosis associated 2                                             |



|                       |             |             |                  |                                                                               |
|-----------------------|-------------|-------------|------------------|-------------------------------------------------------------------------------|
| Nek3_predi<br>cted    | <b>3.28</b> | <b>0.03</b> | XM_224971        | NIMA (never in mitosis gene a)-related expressed kinase 3 (predicted)         |
| Nfkbia                | <b>2.07</b> | <b>0.02</b> | XM_343065        | nuclear factor of kappa light chain gene enhancer in B-cells inhibitor, alpha |
| Ngb                   | <b>1.78</b> | <b>0.00</b> | NM_033359        | neuroglobin                                                                   |
| Ngfg                  | <b>2.01</b> | <b>0.04</b> | NM_031523        | nerve growth factor, gamma                                                    |
| Niban                 | <b>2.04</b> | <b>0.04</b> | NM_022242        | niban protein                                                                 |
| Ninj1                 | <b>1.50</b> | <b>0.00</b> | NM_012867        | ninjurin 1                                                                    |
| Nlgn1                 | <b>1.84</b> | <b>0.00</b> | NM_053868        | neuroligin 1                                                                  |
| NM_02263<br>2         | <b>2.08</b> | <b>0.04</b> | NM_022632        | slit homolog 2                                                                |
| Nmu                   | <b>2.11</b> | <b>0.03</b> | NM_022239        | neuromedin U                                                                  |
| Np_mapped             | <b>1.62</b> | <b>0.01</b> | XM_214155        | nucleoside phosphorylase                                                      |
| Npff                  | <b>1.72</b> | <b>0.03</b> | NM_022586        | neuropeptide FF-amide peptide precursor                                       |
| Nppb                  | <b>1.87</b> | <b>0.02</b> | NM_031545        | natriuretic peptide precursor type B                                          |
| Nr1h3                 | <b>1.78</b> | <b>0.00</b> | NM_031627        | nuclear receptor subfamily 1, group H, member 3                               |
| Nr4a3                 | <b>2.12</b> | <b>0.05</b> | NM_017352        | nuclear receptor subfamily 4, group A, member 3, transcript variant 2         |
| Nrp2                  | <b>2.04</b> | <b>0.04</b> | NM_030869        | neuropilin 2                                                                  |
| Ntf5                  | <b>2.26</b> | <b>0.02</b> | NM_013184        | neurotrophin 5                                                                |
| Nthl1_predi<br>cted   | <b>1.64</b> | <b>0.00</b> | XM_213228        | nth (endonuclease III)-like 1 (E.coli) (predicted)                            |
| Nucks                 | <b>1.54</b> | <b>0.05</b> | NM_022799        | nuclear ubiquitous casein kinase and cyclin-dependent kinase substrate        |
| Nudc                  | <b>1.51</b> | <b>0.00</b> | NM_017271        | nuclear distribution gene C homolog (Aspergillus)                             |
| Oas1                  | <b>3.38</b> | <b>0.01</b> | NM_138913        | 2',5'-oligoadenylate synthetase 1, 40/46kDa                                   |
| Olfml3_pre<br>dicted  | <b>2.70</b> | <b>0.05</b> | XM_227535        | olfactomedin-like 3 (predicted)                                               |
| Olr1060_pr<br>edicted | <b>2.81</b> | <b>0.04</b> | NM_00100069<br>8 | olfactory receptor 1060 (predicted)                                           |
| Olr1223_pr<br>edicted | <b>2.39</b> | <b>0.01</b> | NM_00100044<br>1 | olfactory receptor 1223 (predicted)                                           |
| Olr1230_pr<br>edicted | <b>1.91</b> | <b>0.01</b> | NM_00100059<br>5 | olfactory receptor 1230 (predicted)                                           |
| Olr137_pre<br>dicted  | <b>2.16</b> | <b>0.01</b> | NM_00100128<br>3 | olfactory receptor 137 (predicted)                                            |
| Olr1455_pr<br>edicted | <b>3.32</b> | <b>0.00</b> | NM_00100077<br>1 | olfactory receptor 1455 (predicted)                                           |
| Olr1463_pr<br>edicted | <b>2.89</b> | <b>0.02</b> | NM_00100002<br>3 | olfactory receptor 1463 (predicted)                                           |
| Olr1468               | <b>2.09</b> | <b>0.04</b> | NM_00100072<br>4 | olfactory receptor 1468                                                       |
| Olr1482_pr<br>edicted | <b>2.27</b> | <b>0.02</b> | NM_00100002<br>6 | olfactory receptor 1482 (predicted)                                           |

|                   |             |             |              |                                     |
|-------------------|-------------|-------------|--------------|-------------------------------------|
| Olr1490_predicted | <b>3.75</b> | <b>0.02</b> | NM_001000718 | olfactory receptor 1490 (predicted) |
| Olr1496           | <b>2.23</b> | <b>0.03</b> | NM_001000716 | olfactory receptor 1496             |
| Olr1504           | <b>2.01</b> | <b>0.04</b> | NM_001000495 | olfactory receptor 1504             |
| Olr1507_predicted | <b>2.00</b> | <b>0.04</b> | NM_001000033 | olfactory receptor 1507 (predicted) |
| Olr1567_predicted | <b>2.23</b> | <b>0.05</b> | NM_001000043 | olfactory receptor 1567 (predicted) |
| Olr1582_predicted | <b>2.52</b> | <b>0.01</b> | NM_001000079 | olfactory receptor 1582 (predicted) |
| Olr1701_predicted | <b>3.41</b> | <b>0.02</b> | NM_001001114 | olfactory receptor 1701 (predicted) |
| Olr1765_predicted | <b>2.66</b> | <b>0.04</b> | NM_001000489 | olfactory receptor 1765 (predicted) |
| Olr184_predicted  | <b>3.75</b> | <b>0.02</b> | NM_001000182 | olfactory receptor 184 (predicted)  |
| Olr240_predicted  | <b>2.85</b> | <b>0.04</b> | XM_219206    | olfactory receptor 240 (predicted)  |
| Olr289_predicted  | <b>2.21</b> | <b>0.03</b> | NM_001000767 | olfactory receptor 289 (predicted)  |
| Olr308_predicted  | <b>3.03</b> | <b>0.04</b> | NM_001000955 | olfactory receptor 308 (predicted)  |
| Olr325_predicted  | <b>2.42</b> | <b>0.03</b> | NM_001000247 | olfactory receptor 325 (predicted)  |
| Olr357_predicted  | <b>3.75</b> | <b>0.00</b> | NM_001000257 | olfactory receptor 357 (predicted)  |
| Olr400_predicted  | <b>2.59</b> | <b>0.02</b> | NM_001000379 | olfactory receptor 400 (predicted)  |
| Olr473_predicted  | <b>2.95</b> | <b>0.01</b> | NM_001000302 | olfactory receptor 473 (predicted)  |
| Olr510_predicted  | <b>3.95</b> | <b>0.00</b> | NM_001000312 | olfactory receptor 510 (predicted)  |
| Olr541_predicted  | <b>3.14</b> | <b>0.03</b> | NM_001000565 | olfactory receptor 541 (predicted)  |
| Olr551_predicted  | <b>3.24</b> | <b>0.00</b> | NM_001000670 | olfactory receptor 551 (predicted)  |
| Olr557_predicted  | <b>1.51</b> | <b>0.04</b> | NM_001000669 | olfactory receptor 557 (predicted)  |
| Olr587_predicted  | <b>2.83</b> | <b>0.03</b> | NM_001000659 | olfactory receptor 587 (predicted)  |
| Olr6_predicted    | <b>2.97</b> | <b>0.00</b> | NM_001000539 | olfactory receptor 6 (predicted)    |
| Olr657_predicted  | <b>2.94</b> | <b>0.03</b> | NM_001000343 | olfactory receptor 657 (predicted)  |

|                  |             |             |              |                                                                    |
|------------------|-------------|-------------|--------------|--------------------------------------------------------------------|
| Olr698_predicted | <b>3.08</b> | <b>0.03</b> | NM_001000513 | olfactory receptor 698 (predicted)                                 |
| Olr735_predicted | <b>2.66</b> | <b>0.03</b> | NM_001000922 | olfactory receptor 735 (predicted)                                 |
| Olr773_predicted | <b>1.84</b> | <b>0.02</b> | NM_001000373 | olfactory receptor 773 (predicted)]                                |
| Olr906_predicted | <b>2.66</b> | <b>0.04</b> | NM_001000706 | olfactory receptor 906 (predicted)                                 |
| Olr916_predicted | <b>2.88</b> | <b>0.02</b> | NM_001000587 | olfactory receptor 916 (predicted)                                 |
| Olr92_predicted  | <b>3.86</b> | <b>0.01</b> | NM_001000140 | olfactory receptor 92 (predicted)                                  |
| Oprk1            | <b>2.24</b> | <b>0.02</b> | NM_017167    | opioid receptor, kappa 1                                           |
| Otx2             | <b>2.37</b> | <b>0.05</b> | XM_224009    | orthodenticle homolog 2                                            |
| P2ry14           | <b>2.43</b> | <b>0.04</b> | NM_133577    | purinergic receptor P2Y, G-protein coupled, 14                     |
| P2ry6            | <b>1.50</b> | <b>0.00</b> | NM_057124    | pyrimidinergic receptor P2Y, G-protein coupled, 6 (                |
| Padi2            | <b>2.29</b> | <b>0.03</b> | NM_017226    | peptidyl arginine deiminase, type II                               |
| Parp9_predicted  | <b>2.28</b> | <b>0.03</b> | XM_221404    | poly (ADP-ribose) polymerase family, member 9 (predicted)          |
| Parvb_predicted  | <b>1.62</b> | <b>0.02</b> | XM_343303    | parvin, beta (predicted)                                           |
| Pcbp4_predicted  | <b>1.54</b> | <b>0.00</b> | XM_343468    | poly(rC) binding protein 4 (predicted)                             |
| Pcdhgc3          | <b>2.51</b> | <b>0.01</b> | NM_053943    | protocadherin gamma subfamily C, 3                                 |
| Pde3a            | <b>2.14</b> | <b>0.03</b> | NM_017337    | phosphodiesterase 3A (Pde3a)                                       |
| Pdlim3           | <b>1.67</b> | <b>0.01</b> | NM_053650    | PDZ and LIM domain 3                                               |
| Pebp1            | <b>1.51</b> | <b>0.00</b> | NM_017236    | phosphatidylethanolamine binding protein 1                         |
| Pfdn1_predicted  | <b>1.53</b> | <b>0.01</b> | XM_341596    | prefoldin 1 (predicted)                                            |
| Pgam1            | <b>6.00</b> | <b>0.02</b> | NM_053290    | phosphoglycerate mutase 1                                          |
| Pgsg             | <b>1.61</b> | <b>0.00</b> | NM_020074    | proteoglycan peptide core protein                                  |
| Phf5a            | <b>1.57</b> | <b>0.04</b> | NM_138888    | PHD finger protein 5A                                              |
| Phgdh            | <b>1.53</b> | <b>0.04</b> | NM_031620    | 3-phosphoglycerate dehydrogenase                                   |
| Phkg1            | <b>2.05</b> | <b>0.01</b> | NM_031573    | phosphorylase kinase gamma 1                                       |
| Pirb             | <b>3.69</b> | <b>0.04</b> | NM_031713    | paired-Ig-like receptor B                                          |
| Plek             | <b>1.74</b> | <b>0.02</b> | NM_001025750 | pleckstrin                                                         |
| Plekhb1          | <b>1.52</b> | <b>0.04</b> | NM_172033    | pleckstrin homology domain containing, family B (eectins) member 1 |
| Plfr             | <b>2.12</b> | <b>0.03</b> | NM_053364    | proliferin related protein                                         |
| Plp2_mapped      | <b>1.66</b> | <b>0.00</b> | NM_207601    | proteolipid protein 2 (mapped)                                     |
| Plxnb2           | <b>1.73</b> | <b>0.00</b> | XM_243652    | plexin B2                                                          |
| Pmm1             | <b>1.73</b> | <b>0.03</b> | NM_001008323 | phosphomannomutase 1                                               |

|                  |             |             |                  |                                                                                     |
|------------------|-------------|-------------|------------------|-------------------------------------------------------------------------------------|
| Pmpcb            | <b>1.60</b> | <b>0.03</b> | NM_022395        | peptidase (mitochondrial processing) beta                                           |
| Pmvk             | <b>1.63</b> | <b>0.01</b> | NM_00100835<br>2 | phosphomevalonate kinase                                                            |
| Pon2             | <b>1.62</b> | <b>0.00</b> | NM_00101308<br>2 | paraoxonase 2                                                                       |
| Pop7_predicted   | <b>1.54</b> | <b>0.03</b> | XM_213733        | processing of precursor 7, ribonuclease P family, (S. cerevisiae) (predicted)       |
| Ppm1f            | <b>2.30</b> | <b>0.04</b> | NM_175755        | protein phosphatase 1F (PP2C domain containing)                                     |
| Ppp1r14b         | <b>1.55</b> | <b>0.00</b> | NM_172045        | protein phosphatase 1, regulatory (inhibitor) subunit 14B                           |
| Ppp3ca           | <b>2.43</b> | <b>0.00</b> | NM_017041        | protein phosphatase 3, catalytic subunit, alpha isoform                             |
| Ppp3r2           | <b>2.18</b> | <b>0.03</b> | NM_021701        | protein phosphatase 3, regulatory subunit B, alpha isoform (calcineurin B, type II) |
| Prdx1            | <b>2.05</b> | <b>0.02</b> | NM_057114        | peroxiredoxin 1                                                                     |
| Prfl             | <b>2.83</b> | <b>0.03</b> | NM_017330        | perforin 1 (pore forming protein)                                                   |
| Prkacb_predicted | <b>2.24</b> | <b>0.02</b> | XM_215070        | protein kinase, cAMP dependent, catalytic, beta (predicted)                         |
| Prlpf            | <b>2.17</b> | <b>0.03</b> | NM_022530        | prolactin-like protein F                                                            |
| Prlpi            | <b>2.12</b> | <b>0.03</b> | NM_031316        | prolactin-like protein 1                                                            |
| Prodh2           | <b>1.58</b> | <b>0.00</b> | XM_341825        | proline dehydrogenase                                                               |
| Prom1            | <b>1.67</b> | <b>0.01</b> | NM_021751        | prominin 1                                                                          |
| Prosc_predicted  | <b>1.60</b> | <b>0.00</b> | XM_224947        | proline synthetase co-transcribed (predicted)                                       |
| Prr3             | <b>1.71</b> | <b>0.02</b> | NM_212544        | proline-rich polypeptide 3                                                          |
| Prrx2_predicted  | <b>2.61</b> | <b>0.04</b> | XM_238327        | paired related homeobox 2 (predicted)                                               |
| Prss2            | <b>1.70</b> | <b>0.00</b> | NM_012729        | protease, serine, 2                                                                 |
| Psbpc2           | <b>2.05</b> | <b>0.04</b> | NM_207593        | prostatic steroid-binding protein C2                                                |
| Psen2            | <b>1.51</b> | <b>0.05</b> | NM_031087        | presenilin 2                                                                        |
| Psma3            | <b>1.54</b> | <b>0.04</b> | NM_017280        | proteasome (prosome, macropain) subunit, alpha type 3                               |
| Psbm8            | <b>1.99</b> | <b>0.03</b> | NM_080767        | proteasome (prosome, macropain) subunit, beta type 8                                |
| Psbm9            | <b>2.07</b> | <b>0.01</b> | NM_012708        | proteasome (prosome, macropain) subunit, beta type 9                                |
| Psmc5            | <b>1.64</b> | <b>0.02</b> | NM_031149        | peptidase (prosome, macropain) 26S subunit, ATPase 5                                |
| Psm10            | <b>1.72</b> | <b>0.03</b> | NM_053925        | proteasome (prosome, macropain) 26S subunit, non-ATPase, 10                         |
| Psm9             | <b>1.52</b> | <b>0.01</b> | NM_130430        | proteasome (prosome, macropain) 26S subunit, non-ATPase, 9                          |
| Psm1             | <b>1.56</b> | <b>0.00</b> | NM_017264        | proteasome (prosome, macropain) 28 subunit, alpha                                   |
| Psm2             | <b>1.51</b> | <b>0.00</b> | NM_017257        | proteasome (prosome, macropain) 28 subunit, beta                                    |
| Psp              | <b>2.34</b> | <b>0.02</b> | NM_052808        | parotid secretory protein                                                           |

|                      |             |             |              |                                                                |
|----------------------|-------------|-------------|--------------|----------------------------------------------------------------|
| Pthr1                | <b>1.66</b> | <b>0.01</b> | NM_020073    | parathyroid hormone receptor 1                                 |
| Ptpn6                | <b>1.51</b> | <b>0.00</b> | NM_053908    | protein tyrosine phosphatase, non-receptor type 6              |
| Pvrl2                | <b>1.71</b> | <b>0.01</b> | NM_001012064 | poliovirus receptor-related 2 (herpesvirus entry mediator B)   |
| Pxmp2                | <b>1.52</b> | <b>0.01</b> | NM_031587    | peroxisomal membrane protein 2                                 |
| Rab13                | <b>1.56</b> | <b>0.00</b> | NM_031092    | RAB13, member RAS oncogene family                              |
| Rab25_predicted      | <b>2.20</b> | <b>0.03</b> | XM_227404    | RAB25, member RAS oncogene family (predicted)                  |
| Rarres2              | <b>1.66</b> | <b>0.02</b> | NM_001013427 | retinoic acid receptor responder (tazarotene induced) 2        |
| Rasl12_predicted     | <b>1.56</b> | <b>0.03</b> | XM_236351    | RAS-like, family 12 (predicted)                                |
| Rbm19_predicted      | <b>1.97</b> | <b>0.00</b> | XM_222200    | RNA binding motif protein 19 (predicted)                       |
| Rcvrn                | <b>2.11</b> | <b>0.03</b> | NM_080901    | recoverin                                                      |
| Resp18               | <b>1.87</b> | <b>0.00</b> | NM_019278    | regulated endocrine-specific protein 18                        |
| Retnla               | <b>2.09</b> | <b>0.03</b> | NM_053333    | resistin like alpha                                            |
| Rg9mtd3              | <b>1.51</b> | <b>0.03</b> | NM_001013090 | RNA (guanine-9-) methyltransferase domain containing 3         |
| RGD1305679           | <b>1.76</b> | <b>0.03</b> | NM_001014144 | similar to 9530008L14Rik protein                               |
| RGD1306028           | <b>1.52</b> | <b>0.00</b> | XM_001066308 | similar to hypothetical protein FLJ30473, transcript variant 3 |
| RGD1306660_predicted | <b>1.66</b> | <b>0.00</b> | XM_214304    | similar to RIKEN cDNA 2010315L10 (predicted)                   |
| RGD1307279           | <b>1.51</b> | <b>0.04</b> | NM_001008343 | similar to RIKEN cDNA 2700002I20                               |
| RGD1307506_predicted | <b>1.90</b> | <b>0.00</b> | XM_215486    | similar to RIKEN cDNA 2310016C16 (predicted)                   |
| RGD1307583_predicted | <b>1.68</b> | <b>0.00</b> | XM_341397    | LOC361111 (predicted)                                          |
| RGD1308876_predicted | <b>1.67</b> | <b>0.00</b> | XM_342915    | similar to 2610027C15Rik protein (predicted)                   |
| RGD1309007_predicted | <b>2.89</b> | <b>0.04</b> | XM_215595    | similar to RIKEN cDNA 2610034E18 gene (predicted)              |
| RGD1309362           | <b>3.44</b> | <b>0.00</b> | NM_001024884 | similar to interferon-inducible GTPase                         |
| RGD1309578           | <b>2.87</b> | <b>0.00</b> | NM_001014162 | similar to Aa2-174                                             |

|                      |             |             |              |                                                                                              |
|----------------------|-------------|-------------|--------------|----------------------------------------------------------------------------------------------|
| RGD1310159_predicted | <b>1.50</b> | <b>0.00</b> | XM_222190    | similar to acetyl-coA dehydrogenase -related (111.6 kD)                                      |
| RGD1310170_predicted | <b>1.69</b> | <b>0.04</b> | XM_226431    | similar to beta-1,3-galactosyltransferase-related protein (predicted)                        |
| RGD1311784_predicted | <b>1.68</b> | <b>0.01</b> | XM_213539    | similar to p150 target of rapamycin (TOR)-scaffold protein containing WD-repeats (predicted) |
| RGD1565363_predicted | <b>1.56</b> | <b>0.00</b> | XM_001079962 | similar to RIKEN cDNA 1110025L05 (predicted)                                                 |
| RGD620382            | <b>1.61</b> | <b>0.00</b> | NM_133525    | Nucleoside 2-deoxyribosyltransferase domain containing protein                               |
| Rgn                  | <b>1.92</b> | <b>0.04</b> | NM_031546    | regucalcin                                                                                   |
| Rgs5                 | <b>1.57</b> | <b>0.00</b> | NM_019341    | regulator of G-protein signaling 5                                                           |
| Rnaset2_predicted    | <b>1.73</b> | <b>0.00</b> | XM_214769    | ribonuclease T2 (predicted)                                                                  |
| rnfl141              | <b>3.11</b> | <b>0.03</b> | NM_001001800 | ring finger protein 141                                                                      |
| Rom1                 | <b>1.51</b> | <b>0.02</b> | NM_001009690 | rod outer segment membrane protein 1                                                         |
| Ror2_predicted       | <b>1.63</b> | <b>0.04</b> | XM_225181    | receptor tyrosine kinase-like orphan receptor 2 (predicted)                                  |
| Rpl10a               | <b>1.54</b> | <b>0.00</b> | NM_031065    | ribosomal protein L10A                                                                       |
| Rpl13                | <b>1.63</b> | <b>0.00</b> | NM_031101    | ribosomal protein L13                                                                        |
| Rpl13a               | <b>1.65</b> | <b>0.01</b> | NM_173340    | ribosomal protein L13A                                                                       |
| Rpl14                | <b>1.51</b> | <b>0.00</b> | NM_022949    | ribosomal protein L14                                                                        |
| Rpl18                | <b>1.60</b> | <b>0.01</b> | NM_031102    | ribosomal protein L18                                                                        |
| Rpl23                | <b>1.54</b> | <b>0.00</b> | NM_001007599 | ribosomal protein L23                                                                        |
| Rpl26                | <b>1.64</b> | <b>0.04</b> | XM_213346    | ribosomal protein L26                                                                        |
| Rpl27a_predicted     | <b>1.57</b> | <b>0.00</b> | XM_215041    | ribosomal protein L27a (predicted)                                                           |
| Rpl30                | <b>1.56</b> | <b>0.00</b> | NM_022699    | ribosomal protein L30                                                                        |
| Rpl32                | <b>1.63</b> | <b>0.00</b> | NM_013226    | ribosomal protein L32                                                                        |
| Rpl41                | <b>1.62</b> | <b>0.01</b> | NM_139083    | ribosomal protein L41                                                                        |
| Rpl7                 | <b>1.51</b> | <b>0.01</b> | XM_216318    | ribosomal protein L7                                                                         |
| Rpl9                 | <b>1.70</b> | <b>0.02</b> | NM_001007598 | ribosomal protein L9                                                                         |
| Rplp1                | <b>1.80</b> | <b>0.01</b> | NM_001007604 | ribosomal protein, large, P1                                                                 |
| Rplp2                | <b>1.71</b> | <b>0.04</b> | NM_001030021 | ribosomal protein, large P2                                                                  |
| Rps11                | <b>1.67</b> | <b>0.00</b> | NM_031110    | ribosomal protein S11                                                                        |

|                   |             |             |                  |                                                                      |
|-------------------|-------------|-------------|------------------|----------------------------------------------------------------------|
| Rps12             | <b>1.58</b> | <b>0.00</b> | NM_031709        | ribosomal protein S12                                                |
| Rps14             | <b>1.76</b> | <b>0.01</b> | NM_022672        | ribosomal protein S14                                                |
| Rps15a            | <b>1.58</b> | <b>0.01</b> | NM_053982        | ribosomal protein S15a                                               |
| Rps16             | <b>1.72</b> | <b>0.00</b> | XM_341815        | ribosomal protein S16                                                |
| Rps17             | <b>1.52</b> | <b>0.00</b> | NM_017152        | ribosomal protein S17                                                |
| Rps18             | <b>1.69</b> | <b>0.01</b> | NM_213557        | ribosomal protein S18                                                |
| Rps20             | <b>1.56</b> | <b>0.01</b> | NM_00100760<br>3 | ribosomal protein S20                                                |
| Rps23             | <b>1.69</b> | <b>0.01</b> | NM_078617        | ribosomal protein S23                                                |
| Rps27             | <b>1.79</b> | <b>0.00</b> | NM_053597        | ribosomal protein S27                                                |
| Rps27a            | <b>1.55</b> | <b>0.01</b> | NM_031113        | ribosomal protein S27a                                               |
| Rps29             | <b>1.54</b> | <b>0.00</b> | NM_012876        | ribosomal protein S29                                                |
| Rps3              | <b>1.59</b> | <b>0.02</b> | NM_00100923<br>9 | ribosomal protein S3                                                 |
| Rps3a             | <b>1.57</b> | <b>0.00</b> | NM_017153        | ribosomal protein S3a                                                |
| Rps4x             | <b>1.54</b> | <b>0.00</b> | NM_00100760<br>0 | ribosomal protein S4, X-linked                                       |
| Rps6              | <b>1.70</b> | <b>0.01</b> | NM_017160        | ribosomal protein S6                                                 |
| Rps6kc1           | <b>1.56</b> | <b>0.00</b> | XM_213966        | ribosomal protein S6 kinase, polypeptide 1                           |
| Rps8              | <b>1.62</b> | <b>0.02</b> | NM_031706        | ribosomal protein S8                                                 |
| Rps9              | <b>1.85</b> | <b>0.01</b> | NM_031108        | ribosomal protein S9                                                 |
| Rpsa              | <b>1.69</b> | <b>0.00</b> | NM_017138        | ribosomal protein SA                                                 |
| Rras_predicted    | <b>1.58</b> | <b>0.00</b> | XM_341851        | Harvey rat sarcoma oncogene, subgroup R (predicted) (Rras_predicted) |
| RT1-Aw2           | <b>1.66</b> | <b>0.03</b> | NM_012645        | RT1 class Ib, locus Aw2 (RT1-Aw2)                                    |
| RT1-CI            | <b>1.72</b> | <b>0.01</b> | NM_206848        | RT1 class Ib, locus CI (RT1-CI)                                      |
| RT1-DOb           | <b>2.69</b> | <b>0.05</b> | NM_00100884<br>6 | RT1 class II, locus DOb (RT1-DOb)                                    |
| RT1-S3            | <b>1.87</b> | <b>0.00</b> | XM_215303        | RT1 class Ib, locus S3 (RT1-S3)                                      |
| RT1-T24-1         | <b>1.96</b> | <b>0.02</b> | NM_00100885<br>8 | histocompatibility 2, T region locus 24 (RT1-T24-1),                 |
| Rtkn              | <b>1.50</b> | <b>0.00</b> | NM_184046        | rhotekin                                                             |
| Rup2              | <b>2.86</b> | <b>0.04</b> | NM_00103495<br>0 | urinary protein 2                                                    |
| S100a13_predicted | <b>1.55</b> | <b>0.03</b> | XM_215607        | S100 calcium binding protein A13 (predicted)                         |
| S100a16_predicted | <b>1.51</b> | <b>0.00</b> | XM_342291        | S100 calcium binding protein A16 (predicted)                         |
| S100a6            | <b>2.04</b> | <b>0.00</b> | NM_053485        | S100 calcium binding protein A6 (calcyclin)                          |
| Sat2_predicted    | <b>1.53</b> | <b>0.00</b> | XM_340825        | spermidine/spermine N1-acetyl transferase 2 (predicted)              |
| Scarf2_predicted  | <b>2.33</b> | <b>0.02</b> | XM_237825        | scavenger receptor class F, member 2 (predicted)                     |

|                   |             |             |              |                                                                                        |
|-------------------|-------------|-------------|--------------|----------------------------------------------------------------------------------------|
| Scn7a             | <b>2.08</b> | <b>0.04</b> | NM_031686    | sodium channel, voltage-gated, type VII, alpha (Scn7a)                                 |
| Scrn2             | <b>2.03</b> | <b>0.01</b> | NM_001012142 | secernin 2                                                                             |
| Sdc1              | <b>1.99</b> | <b>0.00</b> | NM_013026    | syndecan 1                                                                             |
| Sdcbp             | <b>1.60</b> | <b>0.02</b> | NM_031986    | syndecan binding protein                                                               |
| Sdha              | <b>1.50</b> | <b>0.00</b> | NM_130428    | succinate dehydrogenase complex, subunit A, flavoprotein (Fp)                          |
| Sdro              | <b>2.88</b> | <b>0.04</b> | XM_343224    | orphan short chain dehydrogenase/reductase                                             |
| Selenbp1          | <b>1.58</b> | <b>0.00</b> | NM_080892    | selenium binding protein 2                                                             |
| Serpind1          | <b>1.99</b> | <b>0.04</b> | NM_024382    | serine (or cysteine) peptidase inhibitor, clade D, member 1                            |
| Sgca_predicted    | <b>1.95</b> | <b>0.00</b> | XM_220884    | sarcoglycan, alpha (dystrophin-associated glycoprotein) (predicted)                    |
| Sip1              | <b>1.62</b> | <b>0.01</b> | NM_053389    | survival of motor neuron protein interacting protein 1                                 |
| Siva_predicted    | <b>1.64</b> | <b>0.00</b> | XM_343117    | Cd27 binding protein (Hindu God of destruction) (predicted)                            |
| Slc18a1           | <b>2.14</b> | <b>0.03</b> | NM_013152    | solute carrier family 18 (vesicular monoamine), member 1                               |
| Slc21a1           | <b>2.24</b> | <b>0.02</b> | NM_017111    | solute carrier family 21, member 1                                                     |
| Slc22a8           | <b>2.13</b> | <b>0.04</b> | NM_031332    | solute carrier family 22 (organic anion transporter), member 8                         |
| Slc23a1           | <b>2.13</b> | <b>0.03</b> | NM_017315    | solute carrier family 23 (nucleobase transporters), member 1                           |
| Slc23a2           | <b>1.65</b> | <b>0.01</b> | NM_017316    | solute carrier family 23 (nucleobase transporters), member 2                           |
| Slc27a5           | <b>1.58</b> | <b>0.03</b> | NM_024143    | solute carrier family 27 (fatty acid transporter), member 5                            |
| Slc35b2           | <b>1.50</b> | <b>0.00</b> | NM_199111    | solute carrier family 35, member B2                                                    |
| Slc35f2_predicted | <b>2.60</b> | <b>0.03</b> | XM_236243    | solute carrier family 35, member F2 (predicted)                                        |
| Slc5a4b           | <b>2.99</b> | <b>0.03</b> | XM_228086    | similar to SGLT3-b                                                                     |
| Slc5a5            | <b>1.61</b> | <b>0.00</b> | NM_052983    | solute carrier family 5 (sodium iodide symporter), member 5                            |
| Slc7a2            | <b>2.14</b> | <b>0.03</b> | NM_022619    | solute carrier family 7 (cationic amino acid transporter, $\gamma^+$ system), member 2 |
| Slc7a3            | <b>1.56</b> | <b>0.01</b> | NM_017217    | solute carrier family 7 (cationic amino acid transporter, $\gamma^+$ system), member 3 |
| Slc9a2            | <b>1.72</b> | <b>0.05</b> | NM_012653    | solute carrier family 9 (sodium/hydrogen exchanger), member 2                          |
| Slco1a4           | <b>1.52</b> | <b>0.01</b> | NM_131906    | solute carrier organic anion transporter family, member 1a4                            |
| Slco2b1           | <b>1.70</b> | <b>0.00</b> | NM_080786    | solute carrier organic anion transporter family, member 2b1                            |



|                     |             |             |                  |                                                                    |
|---------------------|-------------|-------------|------------------|--------------------------------------------------------------------|
| Slfn2_predi<br>cted | <b>2.16</b> | <b>0.01</b> | XM_220779        | schlafen 2 (predicted)                                             |
| Smpdl3a             | <b>1.58</b> | <b>0.00</b> | NM_00100553<br>9 | sphingomyelin phosphodiesterase, acid-like 3A                      |
| Sncg                | <b>2.30</b> | <b>0.00</b> | NM_031688        | synuclein, gamma                                                   |
| Snf8                | <b>1.51</b> | <b>0.00</b> | NM_00100780<br>4 | SNF8, ESCRT-II complex subunit, homolog (S.<br>cerevisiae)         |
| Sp4                 | <b>2.87</b> | <b>0.05</b> | NM_012761        | Sp4 transcription factor                                           |
| Spint2              | <b>1.98</b> | <b>0.05</b> | NM_199087        | serine protease inhibitor, Kunitz type 2                           |
| Ssh3                | <b>1.64</b> | <b>0.02</b> | NM_00101221<br>7 | slingshot homolog 3 (Drosophila)                                   |
| St3gal6             | <b>1.58</b> | <b>0.00</b> | NM_207602        | ST3 beta-galactoside alpha-2,3-sialyltransferase 6                 |
| St8sia4             | <b>1.61</b> | <b>0.03</b> | XM_346078        | ST8 alpha-N-acetyl-neuraminide alpha-2,8-<br>sialyltransferase 4   |
| Stat5a              | <b>1.60</b> | <b>0.00</b> | NM_017064        | signal transducer and activator of transcription 5A<br>(Stat5a)    |
| Stk16               | <b>1.53</b> | <b>0.00</b> | NM_173142        | serine/threonine kinase 16                                         |
| Stk38               | <b>1.53</b> | <b>0.00</b> | NM_00101502<br>5 | serine/threonine kinase 38                                         |
| Sult1a1             | <b>2.09</b> | <b>0.04</b> | NM_031834        | sulfotransferase family 1A, phenol-preferring,<br>member 1         |
| Syt9                | <b>2.01</b> | <b>0.04</b> | NM_053324        | synaptotagmin IX                                                   |
| Taar7g              | <b>1.91</b> | <b>0.04</b> | NM_175588        | trace-amine-associated receptor 7g                                 |
| Tac1                | <b>1.55</b> | <b>0.01</b> | NM_012666        | tachykinin 1                                                       |
| Tagln               | <b>2.71</b> | <b>0.02</b> | AI104443         | cDNA clone RHECD48 3' end                                          |
| Tap2                | <b>2.20</b> | <b>0.01</b> | NM_032056        | transporter 2, ATP-binding cassette, sub-family B<br>(MDR/TAP)     |
| Tas2r105            | <b>1.95</b> | <b>0.05</b> | NM_023999        | taste receptor, type 2, member 105                                 |
| Tcirlg1             | <b>1.65</b> | <b>0.00</b> | BC061859         | T-cell, immune regulator 1, mRNA                                   |
| Tcrb                | <b>2.10</b> | <b>0.03</b> | BC091428         | T-cell receptor beta chain                                         |
| Tctex1              | <b>1.51</b> | <b>0.04</b> | NM_031318        | t-complex testis expressed 1                                       |
| Tec                 | <b>1.61</b> | <b>0.00</b> | XM_341208        | tec protein tyrosine kinase                                        |
| Tekt2               | <b>2.32</b> | <b>0.01</b> | NM_00101197<br>7 | tektin 2                                                           |
| Tepp                | <b>1.52</b> | <b>0.00</b> | NM_201655        | testis/prostate/placenta-expressed protein                         |
| Tff2                | <b>2.11</b> | <b>0.03</b> | NM_053844        | trefoil factor 2 (spasmolytic protein 1)                           |
| Tgm1                | <b>2.57</b> | <b>0.00</b> | NM_031659        | transglutaminase 1                                                 |
| Tgm2                | <b>1.60</b> | <b>0.01</b> | NM_019386        | transglutaminase 2, C polypeptide                                  |
| Timm8a              | <b>1.52</b> | <b>0.01</b> | NM_053370        | translocase of inner mitochondrial membrane 8<br>homolog a (yeast) |
| Timp2               | <b>1.55</b> | <b>0.00</b> | NM_021989        | tissue inhibitor of metalloproteinase 2 (Timp2)                    |
| Tkt                 | <b>1.59</b> | <b>0.05</b> | NM_022592        | transketolase                                                      |
| Tlr2                | <b>1.62</b> | <b>0.00</b> | NM_198769        | toll-like receptor 2                                               |
| Tlr6                | <b>1.52</b> | <b>0.00</b> | NM_207604        | toll-like receptor 6                                               |

|                       |             |             |                  |                                                                         |
|-----------------------|-------------|-------------|------------------|-------------------------------------------------------------------------|
| Tm4sf1_pre<br>dicted  | <b>2.03</b> | <b>0.00</b> | XM_215576        | transmembrane 4 superfamily member 1 (predicted)                        |
| Tm6p1                 | <b>1.75</b> | <b>0.00</b> | NM_139107        | fasting-inducible integral membrane protein TM6P1                       |
| Tmed3                 | <b>1.58</b> | <b>0.00</b> | NM_00100424<br>9 | transmembrane emp24 domain containing 3                                 |
| Tmem50a_p<br>redicted | <b>1.59</b> | <b>0.02</b> | XM_216545        | transmembrane protein 50A (predicted)                                   |
| Tmem54                | <b>2.28</b> | <b>0.02</b> | NM_00103415<br>1 | transmembrane protein 54                                                |
| Tmsb4x                | <b>1.53</b> | <b>0.00</b> | NM_031136        | thymosin, beta 4                                                        |
| Tnfaip8l2             | <b>1.69</b> | <b>0.00</b> | NM_00101403<br>9 | tumor necrosis factor, alpha-induced protein 8-like 2                   |
| Tnfrsf1b              | <b>2.08</b> | <b>0.00</b> | NM_130426        | tumor necrosis factor receptor superfamily, member 1b                   |
| Tnfrsf8               | <b>2.21</b> | <b>0.02</b> | NM_019135        | tumor necrosis factor receptor superfamily, member 8                    |
| Tnfsf10               | <b>2.03</b> | <b>0.04</b> | NM_145681        | tumor necrosis factor (ligand) superfamily, member 10                   |
| Tnnc2                 | <b>1.74</b> | <b>0.00</b> | NM_00103735<br>1 | troponin C type 2 (fast)                                                |
| Tomm20                | <b>2.70</b> | <b>0.00</b> | BU946530         | RALUTXL01 Rattus norvegicus cDNA                                        |
| Trappc4               | <b>1.50</b> | <b>0.00</b> | NM_00100370<br>8 | trafficking protein particle complex 4                                  |
| Trdn                  | <b>1.98</b> | <b>0.05</b> | AJ243303         | triadin 51 kDa                                                          |
| Trem2_pred<br>icted   | <b>1.68</b> | <b>0.00</b> | XM_217335        | triggering receptor expressed on myeloid cells 2 (predicted)            |
| Trim25_ma<br>pped     | <b>1.58</b> | <b>0.04</b> | NM_00100953<br>6 | tripartite motif protein 25 (mapped)                                    |
| Trim42                | <b>1.74</b> | <b>0.01</b> | NM_00101395<br>5 | tripartite motif-containing 42                                          |
| Tspan8                | <b>1.87</b> | <b>0.02</b> | NM_133526        | tetraspanin 8                                                           |
| Tsx                   | <b>2.05</b> | <b>0.04</b> | NM_019203        | testis specific X-linked gene                                           |
| Txndc8                | <b>2.15</b> | <b>0.03</b> | NM_00100409<br>2 | thioredoxin domain containing 8                                         |
| Uap1l1_pre<br>dicted  | <b>1.54</b> | <b>0.01</b> | XM_216004        | UDP-N-acteylglucosamine pyrophosphorylase 1-like 1 (predicted)          |
| Ubb                   | <b>2.00</b> | <b>0.03</b> | NM_138895        | polyubiquitin                                                           |
| Ube2a                 | <b>1.63</b> | <b>0.00</b> | NM_00101393<br>3 | ubiquitin-conjugating enzyme E2A, RAD6 homolog ( <i>S. cerevisiae</i> ) |
| Ube2i                 | <b>1.55</b> | <b>0.00</b> | NM_013050        | ubiquitin-conjugating enzyme E2I                                        |
| Ube2l6                | <b>1.76</b> | <b>0.04</b> | NM_00102475<br>5 | ubiquitin-conjugating enzyme E2L 6                                      |
| Ugt2b10_pr<br>edicted | <b>2.96</b> | <b>0.03</b> | XM_223299        | UDP glycosyltransferase 2 family, polypeptide B10 (predicted)           |
| Uhrf2_predi<br>cted   | <b>2.81</b> | <b>0.05</b> | XM_219801        | similar to nuclear zinc finger protein Np97                             |

|                 |             |             |              |                                                                                                                                |
|-----------------|-------------|-------------|--------------|--------------------------------------------------------------------------------------------------------------------------------|
| Upk3a_predicted | <b>1.92</b> | <b>0.05</b> | XM_235546    | uroplakin 3A (predicted)                                                                                                       |
| Ushbp1          | <b>2.02</b> | <b>0.00</b> | NM_001033687 | Usher syndrome 1C binding protein 1                                                                                            |
| Usp18           | <b>3.16</b> | <b>0.02</b> | NM_001014058 | ubiquitin specific peptidase 18                                                                                                |
| Usp36_predicted | <b>1.63</b> | <b>0.05</b> | XM_221143    | ubiquitin specific protease 36 (predicted)                                                                                     |
| Vamp3           | <b>1.60</b> | <b>0.02</b> | NM_057097    | vesicle-associated membrane protein 3                                                                                          |
| Vamp5           | <b>2.22</b> | <b>0.01</b> | NM_053555    | vesicle-associated membrane protein 5                                                                                          |
| Vamp8           | <b>1.54</b> | <b>0.00</b> | NM_031827    | vesicle-associated membrane protein 8                                                                                          |
| Vcam1           | <b>1.74</b> | <b>0.04</b> | NM_012889    | vascular cell adhesion molecule 1                                                                                              |
| VeZF1_predicted | <b>2.23</b> | <b>0.00</b> | XM_213421    | vascular endothelial zinc finger 1 (predicted)                                                                                 |
| Vmp_predicted   | <b>1.57</b> | <b>0.02</b> | XM_225314    | vesicular membrane protein p24 (predicted)                                                                                     |
| Wap             | <b>2.22</b> | <b>0.02</b> | NM_053751    | whey acidic protein                                                                                                            |
| Wnt6_predicted  | <b>3.01</b> | <b>0.04</b> | XM_237295    | wingless-related MMTV integration site 6 (predicted) (Wnt6_predicted)                                                          |
| X82202          | <b>1.67</b> | <b>0.00</b> | X82202       | RPL19 gene                                                                                                                     |
| XM_213295       | <b>1.50</b> | <b>0.01</b> | XM_213295    | similar to RIKEN cDNA 0610009B22                                                                                               |
| XM_214528       | <b>1.61</b> | <b>0.01</b> | XM_214528    | similar to dim1                                                                                                                |
| XM_215265       | <b>1.79</b> | <b>0.00</b> | XM_215265    | similar to sideroflexin 2                                                                                                      |
| XM_215402       | <b>2.10</b> | <b>0.03</b> | XM_215402    | similar to RIKEN cDNA 5730402C02                                                                                               |
| XM_217106       | <b>1.62</b> | <b>0.00</b> | XM_217106    | similar to hypothetical protein FLJ25530                                                                                       |
| XM_217321       | <b>2.06</b> | <b>0.04</b> | XM_217321    | similar to PCAF acetyltransferase; p300/CBP-associated factor                                                                  |
| XM_218295       | <b>1.98</b> | <b>0.04</b> | XM_218295    | similar to Zinc finger protein 305                                                                                             |
| XM_233741       | <b>1.52</b> | <b>0.01</b> | XM_233741    | similar to tyrosine kinase TYK2                                                                                                |
| XM_340867       | <b>1.66</b> | <b>0.04</b> | XM_340867    | similar to thyroid hormone receptor interactor 3; thyroid receptor interacting protein 3; zinc finger, HIT domain containing 3 |
| XM_341175       | <b>1.61</b> | <b>0.01</b> | XM_341175    | similar to RIKEN cDNA 6030423D04                                                                                               |
| XM_343003       | <b>1.55</b> | <b>0.01</b> | XM_343003    | similar to 9430065L19Rik protein                                                                                               |
| XM_343288       | <b>2.61</b> | <b>0.04</b> | XM_343288    | similar to CG11259-PA                                                                                                          |

|                   |             |             |              |                                                                                    |
|-------------------|-------------|-------------|--------------|------------------------------------------------------------------------------------|
| Zdhhc4            | <b>1.54</b> | <b>0.00</b> | NM_001013123 | zinc finger, DHHC domain containing 4                                              |
| Zfyve21_predicted | <b>1.54</b> | <b>0.00</b> | XM_343115    | zinc finger, FYVE domain containing 21 (predicted)                                 |
| Aanat             | <b>0.59</b> | <b>0.01</b> | NM_012818    | arylalkylamine N-acetyltransferase                                                 |
| Adam7             | <b>0.65</b> | <b>0.01</b> | NM_020301    | a disintegrin and metalloprotease domain 7                                         |
| Adprt11           | <b>0.44</b> | <b>0.02</b> | XM_341326    | ADP-ribosyltransferase (NAD <sup>+</sup> ; poly (ADP-ribose) polymerase)-like 1    |
| Adrb3             | <b>0.60</b> | <b>0.04</b> | NM_013108    | adrenergic receptor, beta 3                                                        |
| Amh               | <b>0.30</b> | <b>0.03</b> | NM_012902    | anti-Mullerian hormone                                                             |
| Amy2_predicted    | <b>0.36</b> | <b>0.00</b> | XM_345278    | similar to amylase 1; amylase 1, salivary                                          |
| Anxa6             | <b>0.53</b> | <b>0.01</b> | NM_024156    | annexin A6                                                                         |
| Apcs              | <b>0.57</b> | <b>0.04</b> | NM_017170    | serum amyloid P-component                                                          |
| Arsj              | <b>0.43</b> | <b>0.04</b> | XM_227873    | arylsulfatase J                                                                    |
| Art1_predicted    | <b>0.51</b> | <b>0.00</b> | XM_218975    | ADP-ribosyltransferase 1 (predicted)                                               |
| Atp6v0a1          | <b>0.58</b> | <b>0.01</b> | NM_031604    | ATPase, H <sup>+</sup> transporting, lysosomal V0 subunit A1                       |
| Atp6v1e1          | <b>0.65</b> | <b>0.02</b> | NM_198745    | ATPase, H <sup>+</sup> transporting, V1 subunit E isoform 1                        |
| B3gnt7            | <b>0.59</b> | <b>0.04</b> | NM_001012134 | UDP-GlcNAc:betaGal beta-1,3-N-acetylglucosaminyltransferase 7)                     |
| Barx1_predicted   | <b>0.40</b> | <b>0.04</b> | XM_344575    | BarH-like homeobox 1 (predicted)                                                   |
| BF389602          | <b>0.63</b> | <b>0.02</b> | BF389602     | cDNA clone UI-R-CJ0-bfd-f-04-0-UI 3'                                               |
| Bicc1_predicted   | <b>0.49</b> | <b>0.01</b> | XM_342126    | bicaudal C homolog 1 (Drosophila) (predicted)                                      |
| Birc4             | <b>0.49</b> | <b>0.02</b> | NM_022231    | baculoviral IAP repeat-containing 4                                                |
| Bmp2              | <b>0.36</b> | <b>0.01</b> | NM_017178    | bone morphogenetic protein 2                                                       |
| Boll_predicted    | <b>0.63</b> | <b>0.03</b> | XM_220155    | bol, boule-like (Drosophila) (predicted)                                           |
| Bpi               | <b>0.45</b> | <b>0.02</b> | NM_001004079 | bactericidal/permeability-increasing protein                                       |
| Bpil2_predicted   | <b>0.50</b> | <b>0.00</b> | XM_235012    | bactericidal/permeability-increasing protein-like 2 (predicted)                    |
| C9                | <b>0.59</b> | <b>0.03</b> | NM_057146    | complement component 9                                                             |
| Ccl22             | <b>0.42</b> | <b>0.01</b> | NM_057203    | chemokine (C-C motif) ligand 22                                                    |
| Ccni_predicted    | <b>0.64</b> | <b>0.04</b> | XM_214007    | cyclin I (predicted)                                                               |
| Cdk2ap1_predicted | <b>0.34</b> | <b>0.03</b> | XM_341076    | CDK2 (cyclin-dependent kinase 2)-associated protein 1 (predicted)                  |
| Cdkn2a            | <b>0.64</b> | <b>0.01</b> | NM_031550    | cyclin-dependent kinase inhibitor 2A                                               |
| Cebpz_predicted   | <b>0.65</b> | <b>0.01</b> | XM_343002    | similar to putative CCAAT binding factor 1; alternatively spliced transcript mCBF1 |
| Celsr3            | <b>0.59</b> | <b>0.00</b> | NM_031320    | cadherin EGF LAG seven-pass G-type receptor 3                                      |
| Chrn4             | <b>0.48</b> | <b>0.01</b> | NM_052806    | cholinergic receptor, nicotinic, beta polypeptide 4                                |

|                    |             |             |                    |                                                                                                                                         |
|--------------------|-------------|-------------|--------------------|-----------------------------------------------------------------------------------------------------------------------------------------|
| Cldn22_predicted   | <b>0.37</b> | <b>0.03</b> | XM_224843          | claudin 22 (predicted)                                                                                                                  |
| Creb3l2            | <b>0.50</b> | <b>0.02</b> | NM_001012188       | cAMP responsive element binding protein 3-like 2                                                                                        |
| Crybb1             | <b>0.38</b> | <b>0.05</b> | NM_012936          | crystallin, beta B1                                                                                                                     |
| Ctns_predicted     | <b>0.43</b> | <b>0.03</b> | XM_001080248       | cystinosis, nephropathic (predicted)                                                                                                    |
| Cutl2_predicted    | <b>0.65</b> | <b>0.02</b> | XM_222184          | cut-like 2 (Drosophila) (predicted)                                                                                                     |
| Cyp2j9             | <b>0.54</b> | <b>0.04</b> | NM_175766          | cytochrome P450, family 2, subfamily j, polypeptide 9                                                                                   |
| D00634             | <b>0.49</b> | <b>0.00</b> | D00634             | beta-1 adrenergic receptor                                                                                                              |
| Ddb1               | <b>0.41</b> | <b>0.03</b> | NM_171995          | damage-specific DNA binding protein 1                                                                                                   |
| Drd3               | <b>0.54</b> | <b>0.05</b> | NM_017140          | dopamine receptor D3 (Drd3)                                                                                                             |
| Dscam11_predicted  | <b>0.63</b> | <b>0.01</b> | XM_236203          | Down syndrome cell adhesion molecule-like 1 (predicted) (Dscam11_predicted)                                                             |
| Egr2               | <b>0.40</b> | <b>0.01</b> | NM_053633          | early growth response 2                                                                                                                 |
| Eif4g3_predicted   | <b>0.56</b> | <b>0.03</b> | XM_216563          | eukaryotic translation initiation factor 4 gamma, 3 (predicted)                                                                         |
| ENSRNOT00000046889 | <b>0.60</b> | <b>0.00</b> | ENSRNOT00000046889 | voltage-gated calcium channel pore forming subunit CaV1.3alpha1 IVS3-IVS4 extracellular linker mRNA, partial cds, alternatively spliced |
| Epha2_predicted    | <b>0.48</b> | <b>0.04</b> | XM_345596          | Eph receptor A2 (predicted)                                                                                                             |
| Epha8              | <b>0.47</b> | <b>0.01</b> | XM_342952          | Eph receptor A8                                                                                                                         |
| Exosc7             | <b>0.40</b> | <b>0.02</b> | XM_236745          | exosome component 7                                                                                                                     |
| Extl3              | <b>0.63</b> | <b>0.03</b> | NM_020097          | exostoses (multiple)-like 3                                                                                                             |
| Fbxl7_predicted    | <b>0.32</b> | <b>0.00</b> | XM_342204          | F-box and leucine-rich repeat protein 7 (predicted)                                                                                     |
| Fbxo33_predicted   | <b>0.56</b> | <b>0.03</b> | XM_234205          | F-box only protein 33 (predicted)                                                                                                       |
| Fbxo34_predicted   | <b>0.55</b> | <b>0.01</b> | XM_223938          | F-box only protein 34 (predicted)                                                                                                       |
| Fcar               | <b>0.53</b> | <b>0.02</b> | NM_201992          | IgA Fc receptor                                                                                                                         |
| Flt1               | <b>0.49</b> | <b>0.01</b> | NM_019306          | FMS-like tyrosine kinase 1                                                                                                              |
| Fosb               | <b>0.47</b> | <b>0.01</b> | XM_001057199       | FBJ osteosarcoma oncogene B                                                                                                             |
| Foxn1_mapped       | <b>0.46</b> | <b>0.02</b> | XM_220632          | forkhead box N1 (mapped)                                                                                                                |
| Fstl3              | <b>0.65</b> | <b>0.03</b> | NM_053629          | follistatin-like 3                                                                                                                      |
| Ghrl               | <b>0.40</b> | <b>0.00</b> | NM_021669          | ghrelin precursor                                                                                                                       |
| Gli2_predicted     | <b>0.34</b> | <b>0.03</b> | XM_222557          | GLI-Kruppel family member GLI2 (predicted)                                                                                              |
| Glrp1_predicted    | <b>0.57</b> | <b>0.02</b> | XM_227165          | glutamine repeat protein 1 (predicted)                                                                                                  |

|                  |             |             |              |                                                                              |
|------------------|-------------|-------------|--------------|------------------------------------------------------------------------------|
| Glt6d1_predicted | <b>0.30</b> | <b>0.03</b> | XM_231076    | glycosyltransferase 6 domain containing 1 (predicted)                        |
| Gm1960           | <b>0.57</b> | <b>0.05</b> | NM_138522    | gene model 1960                                                              |
| Gnb1             | <b>0.37</b> | <b>0.04</b> | NM_030987    | guanine nucleotide binding protein, beta 1                                   |
| Gpatc2           | <b>0.66</b> | <b>0.03</b> | NM_001011909 | G patch domain containing 2                                                  |
| Gpr25_predicted  | <b>0.62</b> | <b>0.02</b> | XM_344146    | G protein-coupled receptor 25 (predicted)                                    |
| Gpr45_predicted  | <b>0.63</b> | <b>0.01</b> | XM_237112    | G protein-coupled receptor 45 (predicted)                                    |
| Gpr87_predicted  | <b>0.44</b> | <b>0.04</b> | XM_227177    | G protein-coupled receptor 87 (predicted)                                    |
| Gpx6             | <b>0.53</b> | <b>0.04</b> | NM_147165    | glutathione peroxidase 6                                                     |
| Gzmb             | <b>0.48</b> | <b>0.00</b> | X76996       | granzyme-like protein III                                                    |
| Hcrt             | <b>0.43</b> | <b>0.01</b> | NM_013179    | hypocretin                                                                   |
| Hdac4            | <b>0.52</b> | <b>0.00</b> | AF321132     | histone deacetylase 4                                                        |
| Hrg              | <b>0.60</b> | <b>0.03</b> | NM_133428    | histidine-rich glycoprotein                                                  |
| Hsd3b1           | <b>0.63</b> | <b>0.04</b> | NM_017265    | hydroxy-delta-5-steroid dehydrogenase, 3 beta- and steroid delta-isomerase 1 |
| Htr5b            | <b>0.59</b> | <b>0.03</b> | XM_341111    | 5-hydroxytryptamine (serotonin) receptor 5B                                  |
| Ifna4_predicted  | <b>0.47</b> | <b>0.02</b> | XM_001053305 | interferon, alpha 4 (predicted)                                              |
| Ing3             | <b>0.43</b> | <b>0.04</b> | NM_001034107 | inhibitor of growth family, member 3                                         |
| Ins2             | <b>0.60</b> | <b>0.04</b> | NM_019130    | insulin 2                                                                    |
| Itgad            | <b>0.54</b> | <b>0.01</b> | NM_031691    | integrin, alpha D                                                            |
| Kcna3            | <b>0.47</b> | <b>0.02</b> | NM_019270    | potassium voltage-gated channel, shaker-related subfamily, member 3          |
| Kcnd2            | <b>0.59</b> | <b>0.02</b> | NM_031730    | potassium voltage gated channel, Shal-related family, member 2               |
| Kcnh7            | <b>0.61</b> | <b>0.00</b> | NM_131912    | potassium voltage-gated channel, subfamily H (eag-related), member 7         |
| Kcnj3            | <b>0.53</b> | <b>0.03</b> | U42423       | G-protein gated potassium channel mRNA, partial CDS                          |
| kif13B           | <b>0.55</b> | <b>0.00</b> | NM_213626    | kinesin 13B                                                                  |
| Kynu             | <b>0.55</b> | <b>0.02</b> | NM_053902    | kynureninase (L-kynurenine hydrolase)                                        |
| Lars             | <b>0.34</b> | <b>0.00</b> | NM_001009637 | leucyl-tRNA synthetase                                                       |
| Lhfpl2_predicted | <b>0.38</b> | <b>0.00</b> | XM_226668    | lipoma HMGIC fusion partner-like 2 (predicted)                               |
| Lmx1b            | <b>0.61</b> | <b>0.03</b> | XM_342419    | LIM homeobox transcription factor 1 beta, transcript variant 2               |
| LOC171412        | <b>0.58</b> | <b>0.00</b> | NM_134391    | E-3 epididymal fluid protein                                                 |
| LOC286987        | <b>0.49</b> | <b>0.02</b> | NM_173321    | hemiferrin, transferrin-like protein                                         |

|                   |             |             |                  |                                                                                                  |
|-------------------|-------------|-------------|------------------|--------------------------------------------------------------------------------------------------|
| LOC305691         | <b>0.51</b> | <b>0.02</b> | NM_00101399<br>2 | similar to hypothetical protein FLJ22419                                                         |
| LOC679370         | <b>0.54</b> | <b>0.01</b> | XM_00105605<br>7 | similar to Myelin P2 protein                                                                     |
| LOC681211         | <b>0.60</b> | <b>0.00</b> | XM_00106076<br>6 | similar to monoacylglycerol O-acyltransferase 2                                                  |
| LOC684984         | <b>0.45</b> | <b>0.01</b> | XM_00106177<br>9 | similar to triggering receptor expressed on myeloid cells 4                                      |
| Ly6g5c            | <b>0.54</b> | <b>0.00</b> | NM_198739        | lymphocyte antigen 6 complex, locus G5C                                                          |
| Mapk4             | <b>0.61</b> | <b>0.05</b> | XM_225726        | mitogen-activated protein kinase 4                                                               |
| March8_predicted  | <b>0.50</b> | <b>0.02</b> | XM_232293        | membrane-associated ring finger (C3HC4) 8 (predicted)                                            |
| Matr3             | <b>0.52</b> | <b>0.01</b> | NM_019149        | matrin 3                                                                                         |
| Mfi2_predicted    | <b>0.65</b> | <b>0.03</b> | XM_237839        | antigen p97 (melanoma associated) identified by monoclonal antibodies 133.2 and 96.5 (predicted) |
| Myl7_predicted    | <b>0.63</b> | <b>0.00</b> | XM_214074        | myosin, light polypeptide 7, regulatory (predicted)                                              |
| Mypn_predicted    | <b>0.52</b> | <b>0.02</b> | XM_228149        | myopalladin (predicted)                                                                          |
| Nfkb2             | <b>0.43</b> | <b>0.00</b> | NM_00100834<br>9 | nuclear factor of kappa light polypeptide gene enhancer in B-cells 2, p49/p100                   |
| Nudt9             | <b>0.45</b> | <b>0.00</b> | NM_00100699<br>1 | nudix (nucleoside diphosphate linked moiety X)-type motif 9                                      |
| Olig3_predicted   | <b>0.64</b> | <b>0.01</b> | XM_218772        | similar to Olig3 bHLH protein                                                                    |
| Olr1070_predicted | <b>0.65</b> | <b>0.01</b> | NM_00100059<br>1 | olfactory receptor 1070 (predicted)                                                              |
| Olr1071_predicted | <b>0.33</b> | <b>0.02</b> | NM_00100006<br>3 | olfactory receptor 1071 (predicted)                                                              |
| Olr1078           | <b>0.63</b> | <b>0.00</b> | NM_207597        | olfactory receptor 1078                                                                          |
| Olr1096_predicted | <b>0.58</b> | <b>0.02</b> | NM_00100048<br>5 | olfactory receptor 1096 (predicted)                                                              |
| Olr1117_predicted | <b>0.64</b> | <b>0.02</b> | NM_00100088<br>4 | olfactory receptor 1117 (predicted)                                                              |
| Olr1142_predicted | <b>0.52</b> | <b>0.01</b> | NM_00100087<br>7 | olfactory receptor 1142 (predicted)                                                              |
| Olr120_predicted  | <b>0.58</b> | <b>0.00</b> | NM_00100015<br>4 | olfactory receptor 120 (predicted)                                                               |
| Olr1218_predicted | <b>0.36</b> | <b>0.02</b> | NM_00100048<br>8 | olfactory receptor 1218 (predicted)                                                              |
| Olr1226           | <b>0.45</b> | <b>0.01</b> | NM_00100044<br>2 | olfactory receptor 1226                                                                          |
| Olr1229_predicted | <b>0.52</b> | <b>0.03</b> | NM_00100044<br>4 | olfactory receptor 1229 (predicted)                                                              |
| Olr127_predicted  | <b>0.51</b> | <b>0.02</b> | NM_00100102<br>6 | olfactory receptor 127 (predicted)                                                               |

|                   |             |             |              |                                     |
|-------------------|-------------|-------------|--------------|-------------------------------------|
| Olr1273_predicted | <b>0.55</b> | <b>0.00</b> | NM_001000458 | olfactory receptor 1273 (predicted) |
| Olr1332_predicted | <b>0.33</b> | <b>0.01</b> | NM_001000477 | olfactory receptor 1332 (predicted) |
| Olr1335_predicted | <b>0.58</b> | <b>0.00</b> | NM_001000479 | olfactory receptor 1335 (predicted) |
| Olr1341_predicted | <b>0.42</b> | <b>0.01</b> | NM_001000482 | olfactory receptor 1341 (predicted) |
| Olr1398           | <b>0.58</b> | <b>0.00</b> | NM_001000002 | olfactory receptor 1398             |
| Olr1401_predicted | <b>0.62</b> | <b>0.01</b> | NM_001000003 | olfactory receptor 1401 (predicted) |
| Olr1433_predicted | <b>0.54</b> | <b>0.00</b> | NM_001000525 | olfactory receptor 1433 (predicted) |
| Olr1439_predicted | <b>0.55</b> | <b>0.03</b> | NM_001000016 | olfactory receptor 1439 (predicted) |
| Olr1462_predicted | <b>0.54</b> | <b>0.01</b> | NM_001001097 | olfactory receptor 1462 (predicted) |
| Olr1570_predicted | <b>0.36</b> | <b>0.04</b> | NM_001000041 | olfactory receptor 1570 (predicted) |
| Olr1631_predicted | <b>0.63</b> | <b>0.02</b> | NM_001000837 | olfactory receptor 1631 (predicted) |
| Olr1750_predicted | <b>0.51</b> | <b>0.01</b> | NM_212493    | olfactory receptor 1750 (predicted) |
| Olr197_predicted  | <b>0.61</b> | <b>0.02</b> | NM_001000188 | olfactory receptor 197 (predicted)  |
| Olr276_predicted  | <b>0.59</b> | <b>0.02</b> | NM_001000227 | olfactory receptor 276 (predicted)  |
| Olr306_predicted  | <b>0.58</b> | <b>0.05</b> | NM_001000766 | olfactory receptor 306 (predicted)  |
| Olr309_predicted  | <b>0.62</b> | <b>0.05</b> | NM_001000242 | olfactory receptor 309 (predicted)  |
| Olr379_predicted  | <b>0.48</b> | <b>0.04</b> | NM_001000261 | olfactory receptor 379 (predicted)  |
| Olr386_predicted  | <b>0.60</b> | <b>0.00</b> | NM_001000856 | olfactory receptor 386 (predicted)  |
| Olr463_predicted  | <b>0.43</b> | <b>0.04</b> | NM_001000934 | olfactory receptor 463 (predicted)  |
| Olr575_predicted  | <b>0.41</b> | <b>0.01</b> | NM_001000327 | olfactory receptor 575 (predicted)  |
| Olr60_predicted   | <b>0.60</b> | <b>0.01</b> | NM_001000748 | olfactory receptor 60 (predicted)   |
| Olr663_predicted  | <b>0.66</b> | <b>0.01</b> | NM_001000346 | olfactory receptor 663 (predicted)  |
| Olr715_predicted  | <b>0.55</b> | <b>0.03</b> | NM_001000623 | olfactory receptor 715 (predicted)  |



|                   |             |             |              |                                                                          |
|-------------------|-------------|-------------|--------------|--------------------------------------------------------------------------|
| Olr741_predicted  | <b>0.42</b> | <b>0.03</b> | NM_001000575 | olfactory receptor 741 (predicted)                                       |
| Olr744_predicted  | <b>0.59</b> | <b>0.01</b> | NM_001000577 | olfactory receptor 744 (predicted)                                       |
| Olr750_predicted  | <b>0.36</b> | <b>0.02</b> | NM_001000366 | olfactory receptor 750 (predicted)                                       |
| Olr760_predicted  | <b>0.50</b> | <b>0.04</b> | NM_001001069 | olfactory receptor 760 (predicted)                                       |
| Olr769_predicted  | <b>0.60</b> | <b>0.00</b> | NM_001000371 | olfactory receptor 769 (predicted)                                       |
| Olr789_predicted  | <b>0.58</b> | <b>0.00</b> | NM_001000377 | olfactory receptor 789 (predicted)                                       |
| Olr821_predicted  | <b>0.51</b> | <b>0.04</b> | NM_001000842 | olfactory receptor 821 (predicted)                                       |
| Olr825_predicted  | <b>0.49</b> | <b>0.01</b> | NM_001000904 | olfactory receptor 825 (predicted)                                       |
| Olr883_predicted  | <b>0.65</b> | <b>0.00</b> | NM_001001358 | olfactory receptor 883 (predicted)                                       |
| Olr93_predicted   | <b>0.64</b> | <b>0.00</b> | NM_001000141 | olfactory receptor 93 (predicted)                                        |
| Opcml             | <b>0.61</b> | <b>0.02</b> | NM_053848    | opioid binding protein/cell adhesion molecule-like                       |
| Osbp2_predicted   | <b>0.62</b> | <b>0.02</b> | XM_223556    | oxysterol binding protein 2 (predicted)                                  |
| P2ry4             | <b>0.41</b> | <b>0.01</b> | NM_031680    | pyrimidinergic receptor P2Y, G-protein coupled, 4                        |
| Pcdh7             | <b>0.64</b> | <b>0.02</b> | NM_001004087 | protocadherin 7                                                          |
| Pcm1              | <b>0.56</b> | <b>0.00</b> | XM_344524    | pericentriolar material 1                                                |
| Pcp2              | <b>0.46</b> | <b>0.00</b> | XM_221787    | Purkinje cell protein 2 (L7)                                             |
| Pde11a            | <b>0.58</b> | <b>0.02</b> | NM_080893    | phosphodiesterase 11A                                                    |
| Pdia4             | <b>0.52</b> | <b>0.02</b> | NM_053849    | protein disulfide isomerase associated 4                                 |
| Pdzk1ip1          | <b>0.29</b> | <b>0.01</b> | NM_130401    | PDZK1 interacting protein 1                                              |
| Pgam2             | <b>0.66</b> | <b>0.03</b> | NM_017328    | phosphoglycerate mutase 2                                                |
| Pgc               | <b>0.59</b> | <b>0.01</b> | NM_133284    | progastricsin (pepsinogen C)                                             |
| Pglyrp1           | <b>0.60</b> | <b>0.01</b> | NM_053373    | peptidoglycan recognition protein 1                                      |
| Phr1_predicted    | <b>0.64</b> | <b>0.01</b> | XM_214245    | pam, highwire, rpm 1 (predicted)                                         |
| Ppfibp1_predicted | <b>0.59</b> | <b>0.04</b> | XM_232536    | PTPRF interacting protein, binding protein 1 (liprin beta 1) (predicted) |
| Ppm1e             | <b>0.47</b> | <b>0.00</b> | NM_198773    | protein phosphatase 1E (PP2C domain containing)                          |
| Ptch1             | <b>0.43</b> | <b>0.02</b> | NM_053566    | patched homolog 1 (Drosophila)                                           |
| Ptch1_predicted   | <b>0.58</b> | <b>0.01</b> | XM_345570    | patched homolog 1 (predicted)                                            |
| Ptpn14_predicted  | <b>0.48</b> | <b>0.01</b> | XM_223062    | protein tyrosine phosphatase, non-receptor type 14 (predicted)           |
| Ptprq             | <b>0.60</b> | <b>0.04</b> | NM_022925    | protein tyrosine phosphatase, receptor type, Q                           |

|                      |             |             |              |                                                                                                |
|----------------------|-------------|-------------|--------------|------------------------------------------------------------------------------------------------|
| PVR                  | <b>0.54</b> | <b>0.02</b> | NM_017076    | poliovirus receptor                                                                            |
| Rapgef1              | <b>0.53</b> | <b>0.01</b> | XM_216018    | Rap guanine nucleotide exchange factor (GEF) 1                                                 |
| Rapgef5              | <b>0.56</b> | <b>0.00</b> | AY390379     | gb Rattus norvegicus guanine nucleotide exchange factor (Mrgef) mRNA, complete cds. [AY390379] |
| Rasal1_predicted     | <b>0.61</b> | <b>0.00</b> | XM_341088    | similar to RAS protein activator like 1 (GAP1 like)                                            |
| Rblcc1_predicted     | <b>0.61</b> | <b>0.00</b> | XM_232667    | RB1-inducible coiled-coil 1 (predicted)                                                        |
| Rbpsuhl_predicted    | <b>0.58</b> | <b>0.00</b> | XM_342576    | recombining binding protein suppressor of hairless-like (Drosophila) (predicted)               |
| Ren1                 | <b>0.31</b> | <b>0.01</b> | NM_012642    | renin 1                                                                                        |
| RGD1306008_predicted | <b>0.53</b> | <b>0.02</b> | XM_228035    | similar to RIKEN cDNA 4930511I11 (predicted)                                                   |
| RGD1306862_predicted | <b>0.56</b> | <b>0.02</b> | XM_213430    | similar to RIKEN cDNA 1200011M11 (predicted)                                                   |
| RGD1307729_predicted | <b>0.28</b> | <b>0.02</b> | XM_224295    | similar to KIAA0853 protein (predicted)                                                        |
| RGD1307909_predicted | <b>0.55</b> | <b>0.05</b> | XM_215865    | similar to Hypothetical BAF-like protein C20orf179 (predicted)                                 |
| RGD1308535_predicted | <b>0.63</b> | <b>0.01</b> | XM_227419    | similar to Pygopus homolog 2 (predicted)                                                       |
| RGD1308556           | <b>0.57</b> | <b>0.00</b> | NM_001014200 | similar to SPPL2b; presenilin-like protein 1                                                   |
| RGD1309403_predicted | <b>0.66</b> | <b>0.04</b> | XM_227140    | similar to hypothetical protein FLJ12661 (predicted)                                           |
| RGD1309644_predicted | <b>0.54</b> | <b>0.00</b> | XM_237394    | similar to Hypothetical protein KIAA0469 (predicted)                                           |
| RGD1309886           | <b>0.62</b> | <b>0.02</b> | NM_001033896 | similar to RIKEN cDNA 2310042N02                                                               |
| RGD1311793_predicted | <b>0.47</b> | <b>0.04</b> | XM_224908    | similar to DNA segment, Chr 8, ERATO Doi 82, expressed (predicted)                             |
| RGD1560587_predicted | <b>0.65</b> | <b>0.05</b> | XM_244186    | similar to Eph receptor A4 (predicted)                                                         |
| RGD1560732_predicted | <b>0.62</b> | <b>0.04</b> | XM_574766    | similar to LIM and senescent cell antigen-like domains 1 (predicted)                           |
| Rhced                | <b>0.64</b> | <b>0.00</b> | NM_022505    | Rhesus blood group CE and D                                                                    |

|                   |             |             |              |                                                                                                               |
|-------------------|-------------|-------------|--------------|---------------------------------------------------------------------------------------------------------------|
| Rln3r1            | <b>0.53</b> | <b>0.03</b> | NM_001008310 | relaxin 3 receptor 1                                                                                          |
| Rnd1              | <b>0.60</b> | <b>0.01</b> | NM_001013222 | Rho family GTPase 1                                                                                           |
| Rpl11_predicted   | <b>0.34</b> | <b>0.04</b> | XM_001066326 | retinitis pigmentosa 1-like 1 (predicted)                                                                     |
| Scgb3a1           | <b>0.34</b> | <b>0.00</b> | NM_001013180 | secretoglobin, family 3A, member 1                                                                            |
| Scnn1a            | <b>0.49</b> | <b>0.04</b> | NM_031548    | sodium channel, nonvoltage-gated 1 alpha                                                                      |
| Sema7a_predicted  | <b>0.55</b> | <b>0.00</b> | XM_243863    | sema domain, immunoglobulin domain (Ig), and GPI membrane anchor, (semaphorin) 7A (predicted)                 |
| Serpinc1          | <b>0.53</b> | <b>0.05</b> | NM_001012027 | serine (or cysteine) peptidase inhibitor, clade C (antithrombin), member 1                                    |
| Slc12a1           | <b>0.18</b> | <b>0.01</b> | NM_019134    | solute carrier family 12, member 1                                                                            |
| Slc14a2           | <b>0.54</b> | <b>0.00</b> | NM_177962    | solute carrier family 14 (urea transporter), member 2                                                         |
| Slc16a10          | <b>0.35</b> | <b>0.05</b> | NM_138831    | solute carrier family 16 (monocarboxylic acid transporters), member 10                                        |
| Slc24a2           | <b>0.54</b> | <b>0.01</b> | NM_031743    | solute carrier family 24 (sodium/potassium/calcium exchanger), member 2                                       |
| Slc34a1           | <b>0.34</b> | <b>0.00</b> | NM_013030    | solute carrier family 34 (sodium phosphate), member 1                                                         |
| Slc39a4_predicted | <b>0.65</b> | <b>0.00</b> | XM_216970    | solute carrier family 39 (zinc transporter), member 4 (predicted)                                             |
| Slc43a2_predicted | <b>0.60</b> | <b>0.05</b> | XM_213381    | solute carrier family 43, member 2 (predicted)                                                                |
| Slc7a9            | <b>0.55</b> | <b>0.03</b> | NM_053929    | solute carrier family 7 (cationic amino acid transporter, y+ system), member 9                                |
| Slc9a3            | <b>0.49</b> | <b>0.01</b> | NM_012654    | solute carrier family 9 (sodium/hydrogen exchanger), member 3                                                 |
| Smug1             | <b>0.34</b> | <b>0.03</b> | NM_177934    | single-strand selective monofunctional uracil DNA glycosylase                                                 |
| Sox14_predicted   | <b>0.53</b> | <b>0.04</b> | XM_236605    | SRY-box containing gene 14 (predicted)                                                                        |
| Spap1_predicted   | <b>0.65</b> | <b>0.02</b> | XM_227483    | similar to BXMAS1-like protein 2                                                                              |
| Stk3              | <b>0.48</b> | <b>0.03</b> | NM_031735    | serine/threonine kinase 3 (STE20 homolog, yeast)                                                              |
| Sycn              | <b>0.61</b> | <b>0.03</b> | NM_139086    | syncollin                                                                                                     |
| Tbx19_predicted   | <b>0.41</b> | <b>0.04</b> | XM_222834    | T-box 19 (predicted)                                                                                          |
| TC523276          | <b>0.46</b> | <b>0.05</b> | TC523276     | Retinal cone rhodopsin-sensitive cGMP 3',5'-cyclic phosphodiesterase gamma-subunit (GMP-PDE gamma) , complete |
| TC560921          | <b>0.48</b> | <b>0.03</b> | TC560921     | Dihydroorotate dehydrogenase (Dihydroorotate oxidase) (DHODEHase) (DHODase) (DHOD) , partial (6%)             |
| Tgfb3             | <b>0.34</b> | <b>0.01</b> | NM_017256    | transforming growth factor, beta receptor III                                                                 |

|                  |             |             |              |                                                                                  |
|------------------|-------------|-------------|--------------|----------------------------------------------------------------------------------|
| Tiam1            | <b>0.39</b> | <b>0.00</b> | XM_221672    | T-cell lymphoma invasion and metastasis 1                                        |
| Tpt1             | <b>0.53</b> | <b>0.02</b> | NM_053867    | tumor protein, translationally-controlled 1                                      |
| Treh             | <b>0.32</b> | <b>0.00</b> | XM_343380    | trehalase (brush-border membrane glycoprotein)                                   |
| Tspan2           | <b>0.47</b> | <b>0.04</b> | NM_022589    | tetraspanin 2                                                                    |
| Ttc3_predicted   | <b>0.46</b> | <b>0.04</b> | XM_340973    | tetratricopeptide repeat domain 3 (predicted)                                    |
| Tubal3_predicted | <b>0.46</b> | <b>0.04</b> | XM_225547    | tubulin, alpha-like 3 (predicted)                                                |
| Tulp1_predicted  | <b>0.47</b> | <b>0.02</b> | XM_228360    | tubby like protein 1 (predicted)                                                 |
| Ung              | <b>0.60</b> | <b>0.02</b> | NM_001013124 | uracil-DNA glycosylase                                                           |
| Usp6nl_predicted | <b>0.58</b> | <b>0.01</b> | XM_214508    | similar to Expressed sequence AI316785                                           |
| Wbp2             | <b>0.66</b> | <b>0.01</b> | NM_138975    | WW domain binding protein 2                                                      |
| XM_213470        | <b>0.34</b> | <b>0.04</b> | XM_213470    | similar to type I intermediate filament cytokeratin                              |
| XM_217407        | <b>0.30</b> | <b>0.00</b> | XM_217407    | similar to NIF3L1                                                                |
| XM_219411        | <b>0.57</b> | <b>0.00</b> | XM_219411    | similar to phosphatidylinositolglycan class N                                    |
| XM_220714        | <b>0.63</b> | <b>0.05</b> | XM_220714    | similar to spinster-like protein                                                 |
| XM_222110        | <b>0.63</b> | <b>0.01</b> | XM_222110    | similar to zinc finger protein 11                                                |
| XM_228010        | <b>0.60</b> | <b>0.00</b> | XM_228010    | similar to HLA class II histocompatibility antigen, SB beta chain                |
| XM_234553        | <b>0.60</b> | <b>0.02</b> | XM_234553    | similar to DNA-repair protein XRCC3 (X-ray repair cross-complementing protein 3) |
| Xylt1            | <b>0.55</b> | <b>0.03</b> | XM_341912    | xylosyltransferase 1                                                             |
| Y00054           | <b>0.56</b> | <b>0.00</b> | Y00054       | hsc73 , the major hsp70-like protein                                             |
| Zc3h8            | <b>0.62</b> | <b>0.03</b> | NM_001012090 | zinc finger CCCH type containing 8                                               |
| Zfp189_predicted | <b>0.55</b> | <b>0.00</b> | XM_232972    | zinc finger protein 189 (predicted)                                              |
| Zfp260           | <b>0.58</b> | <b>0.04</b> | NM_017364    | zinc finger protein 260                                                          |
| Zg16             | <b>0.55</b> | <b>0.04</b> | NM_134409    | zymogen granule protein 16 (                                                     |
| Zhx3             | <b>0.63</b> | <b>0.01</b> | XM_230811    | zinc fingers and homeoboxes 3, transcript variant 2                              |

**Supplemental Table 3:** Functional classification of genes regulated by early stress (ES) in the prefrontal cortex. The prefrontal transcriptome in rats subjected to ES was analyzed. All the ES regulated genes were subjected to functional analysis using DAVID. Given in the table is a list of selected important functional categories that were significantly enriched in the ES group.

| Term                                                                                         | No of ES regulated Genes in category | PValue   | Fold Enrichment |
|----------------------------------------------------------------------------------------------|--------------------------------------|----------|-----------------|
| GO:0007200~G-protein signaling, coupled to IP3 second messenger (phospholipase C activating) | 12                                   | 0.010106 | 2.423548        |
| GO:0006874~cellular calcium ion homeostasis                                                  | 16                                   | 0.00907  | 2.099229        |
| GO:0009967~positive regulation of signal transduction                                        | 19                                   | 0.001923 | 2.246831        |
| GO:0005886~plasma membrane                                                                   | 137                                  | 7.23E-04 | 1.298394        |
| GO:0009605~response to external stimulus                                                     | 82                                   | 1.68E-10 | 2.102598        |
| GO:0006950~response to stress                                                                | 93                                   | 3.24E-06 | 1.616675        |
| GO:0048869~cellular developmental process                                                    | 119                                  | 4.29E-04 | 1.350368        |

**GO category**

**ES regulated genes in the category**

**ENTREZ\_GENE\_ID**

**Gene Name**

**GO:0007200~G-protein signaling, coupled to IP3 second messenger (phospholipase C activating)**

- 25316 Membrane-spanning 4-domains, subfamily A, member 2
- 117264 Pyrimidinergic receptor P2Y, G-protein coupled, 6
- 56083 Transglutaminase 2, C polypeptide
- 116562 Interleukin 2
- 116506 Calcitonin receptor
- 25723 Hypocretin
- 294807 Similar to somatostatin- and angiogenin-like peptide receptor (G-protein coupled receptor SALPR)
- 24179 Angiotensinogen
- 63843 Pyrimidinergic receptor P2Y, G-protein coupled, 4
- 24889 Cholecystokinin A receptor
- 24400 Guanine nucleotide binding protein, beta 1

**GO:0006874~cellular  
calcium ion homeostasis**

56813 Parathyroid hormone receptor 1  
59299 Triadin  
25106 Regucalcin  
56083 Transglutaminase 2, C polypeptide  
116562 Interleukin 2  
25723 Hypocretin  
56813 Parathyroid hormone receptor 1  
24400 Guanine nucleotide binding protein, beta 1  
114099 Cysteinyl leukotriene receptor 1  
365901 Guanine nucleotide binding protein, alpha  
transducing 2 (predicted)  
25316 Membrane-spanning 4-domains, subfamily  
A, member 2  
25728 Apolipoprotein E  
63843 Pyrimidinergic receptor P2Y, G-protein  
coupled, 4  
294807 Similar to somatostatin- and angiogenin-  
like peptide receptor (G-protein coupled  
receptor SALPR)  
362119 Complement component 5  
24889 Cholecystikinin a receptor  
116646 Tumor protein, translationally-controlled 1

**GO:0009967~positive  
regulation of signal  
transduction**

294257 B-factor, properdin  
56646 Lectin, galactose binding, soluble 1  
24231 Complement component 2  
56083 Transglutaminase 2, C polypeptide  
29543 Tissue inhibitor of metalloproteinase 2  
24337 V-erb-b2 erythroblastic leukemia viral  
oncogene homolog 2, neuro/glioblastoma  
derived oncogene homolog (avian)  
116562 Interleukin 2  
29610 Transforming growth factor, beta receptor  
iii  
361795 Lymphotoxin B  
25645 Adrenergic receptor, Beta 3  
315108 Apolipoprotein L, 3  
29427 Allograft inflammatory factor 1  
294239 Dimethylarginine dimethylaminohydrolase  
2  
24820 T-cell receptor beta chain

**GO:0005886~plasma  
membrane**

- 24737 RT1 class Ib, locus AW2
- 24472 Heat shock 70kd protein 1A
- 294245 Epididymal secretory protein 8
- 361242 Dual specificity phosphatase 22 (predicted)
- 24179 Angiotensinogen
  
- 89818 Vesicle-associated membrane protein 5
  
- 293650 T-cell, immune regulator 1
- 300678 Cd3 antigen, gamma polypeptide
- 25548 Solute carrier family 34 (sodium phosphate), member 1
- 24400 Guanine nucleotide binding protein, beta 1
- 116726 Solute carrier family 7 (cationic amino acid transporter, Y<sup>+</sup> system), member 9
- 84353 Catenin (cadherin associated protein), beta 1, 88kda
- 58974 Gamma-aminobutyric acid receptor associated protein
- 60589 Eph receptor A8
- 25728 Apolipoprotein E
- 25103 Cholinergic receptor, nicotinic, beta polypeptide 4
- 306071 Lymphocyte cytosolic protein 1
- 294228 RT1 class Ib, locus bm1
- 65133 Aquaporin 3
- 85259 Cyclic nucleotide-gated cation channel
- 24783 Solute carrier family 9, member 2
- 25288 Acyl-coa synthetase long-chain family member 1
- 25110 Killer cell lectin-like receptor, subfamily d, member 1
- 24536 Leptin receptor
- 117512 Complement component 9
- 29335 Opioid receptor, kappa 1
- 83841 Syndecan binding protein
- 310553 Toll-like receptor 2
- 60576 Trehalase (brush-border membrane glycoprotein)
- 79125 Annexin A6
- 83500 Solute carrier family 22 (organic anion transporter), member 8
- 300019 Gpi anchored molecule like protein (predicted)

245962 Cd48 antigen  
 50599 Potassium inwardly-rectifying channel, subfamily J, member 3  
 315348 Hematopoietic protein 1 (predicted)  
 24337 V-erb-b2 erythroblastic leukemia viral oncogene homolog 2, neuro/glioblastoma derived oncogene homolog (avian)  
 171028 Atpase, H<sup>+</sup>/K<sup>+</sup> transporting, nongastric, alpha polypeptide  
 60414 Rhesus blood group CE and D  
 25122 Sodium channel, nonvoltage-gated, type I, alpha polypeptide  
 50621 Solute carrier family 23 (nucleobase transporters), member 1  
 287532 Similar to hypothetical protein mgc28931 (predicted)  
 361795 Lymphotoxin b  
 29585 Gap junction membrane channel protein beta 3  
 116597 Opioid-binding protein/cell adhesion molecule-like  
 114200 Leprecan 1  
 171131 Cholinergic receptor, nicotinic, beta polypeptide 3  
 297566 Atpase, H<sup>+</sup> transporting, V1 subunit E isoform 1  
 309201 Rod outer segment membrane protein 1  
 303468 Sarcoglycan, alpha (dystrophin-associated glycoprotein) (predicted)  
 63843 Pyrimidinergic receptor P2Y, G-protein coupled, 4  
 25216 Syndecan 1  
 50622 Solute carrier family 23 (nucleobase transporters), member 2  
 116591 Fc receptor, IgG, low affinity III  
 89830 Patched homolog 1 (drosophila)  
 361787 Histocompatibility 2, T region locus 24  
 302822 Immunoglobulin superfamily, member 1  
 25316 Membrane-spanning 4-domains, subfamily A, member 2  
 60335 Transglutaminase 1  
 155012 Complement component factor H  
 64554 Solute carrier family 7 (cationic amino acid transporter, Y<sup>+</sup> system), member 2  
 79129 Cytochrome B-245, alpha polypeptide  
 306782 Receptor tyrosine kinase-like orphan



receptor 2 (predicted)  
 25406 Cd44 antigen  
 64155 Sodium channel, voltage-gated, type 6,  
 alpha polypeptide  
 25711 Guanylate cyclase 2c  
 29364 Cd47 antigen (rh-related antigen, integrin-  
 associated signal transducer)  
 60357 Prominin 1  
 56766 Leptin receptor overlapping transcript  
 29186 Cd63 antigen  
 83512 Fatty acid desaturase 2  
 300051 Solute carrier family 39 (zinc transporter),  
 member 4 (predicted)  
 289240 Olfactory receptor 1582 (predicted)  
 316137 Egf-like module containing, mucin-like,  
 hormone receptor-like sequence 1  
 116506 Calcitonin receptor  
 308417 Poliovirus receptor-related 2 (herpesvirus  
 entry mediator B)  
 24889 Cholecystokinin A receptor  
 361788 Proline-rich polypeptide 3  
 171358 Calcium/calmodulin-dependent protein  
 kinase I gamma  
 25109 Cd1d1 antigen  
 25311 Deleted in colorectal carcinoma  
 295490 Endomucin  
 56083 Transglutaminase 2, C polypeptide  
 81751 Presenilin 2  
 117059 Calbindin 2  
 24954 Insulin receptor  
 29641 A disintegrin and metalloprotease domain 7  
 29610 Transforming growth factor, beta receptor  
 III  
 294204 Olfactory receptor 1750 (predicted)  
 56813 Parathyroid hormone receptor 1  
 117018 Potassium voltage-gated channel, subfamily  
 h (eag-related), member 2  
 114099 Cysteinyl leukotriene receptor 1  
 25645 Adrenergic receptor, beta 3  
 54251 Fms-like tyrosine kinase 1  
 24925 Adrenergic receptor, beta 1  
 365901 Guanine nucleotide binding protein, alpha  
 transducing 2 (predicted)  
 29427 Allograft inflammatory factor 1  
 81521 Moesin

362053 Chloride channel calcium activated 6  
 116655 Heterogeneous nuclear ribonucleoprotein m  
 24737 RT1 class Ib, locus aw2  
 295279 Fc receptor, IgG, high affinity I  
 362993 Rho family Gtpase 1  
 81756 Rab13, member ras oncogene family  
 25065 Solute carrier family 12, member 1  
 64545 Inducible T-cell co-stimulator  
 24784 Solute carrier family 9, member 3  
 81527 Neuropilin 2  
 117264 Pyrimidinergic receptor P2Y, G-protein  
 coupled, 6  
 29238 Dopamine receptor D3  
 378947 Bone marrow stromal cell antigen 2  
 24977 RT1 class Ib, locus Cl  
 79433 Myosin heavy chain 10, non-muscle  
 308873 Adp-ribosyltransferase 1 (predicted)  
 65180 Potassium voltage gated channel, shal-  
 related family, member 2  
 304109 T-cell lymphoma invasion and metastasis 1  
 288038 Antigen p97 (melanoma associated)  
 identified by monoclonal antibodies 133.2  
 and 96.5 (predicted)  
 114613 Solute carrier family 5 (sodium iodide  
 symporter), member 5  
 24820 T-cell receptor beta chain  
 24412 Glutamate receptor, ionotropic, NMDA2D  
 25420 Crystallin, alpha B  
 84403 Gap junction membrane channel protein  
 beta 6  
 365542 RT1 class II, locus dob  
 307403 Colony stimulating factor 1 receptor  
 29731 Potassium voltage-gated channel, shaker-  
 related subfamily, member 3  
 307199 Cd226 antigen (predicted)  
 113955 Glycoprotein (transmembrane) nmb  
 366492 Eph receptor A2 (predicted)  
 295061 Transmembrane 4 superfamily member 1  
 (predicted)  
 171048 Tetraspanin 8  
 54404 Inter alpha-trypsin inhibitor, heavy chain 4  
 29257 Ribosomal protein l9  
 298598 Unknown (protein for Mgc:72598)  
 78967 Melanoma cell adhesion molecule  
 89783 Lysosomal-associated protein

**GO:0009605~response to external stimulus**

- transmembrane 5
- 304966 Fc fragment of IgG, low affinity IIIa, receptor
- 25635 Melanocortin 4 receptor
- 29333 Membrane cofactor protein
- 306247 Interleukin 17 receptor b (predicted)
- 114089 Inositol polyphosphate-5-phosphatase e
- 116647 Neuroligin 1
- 294807 Similar to somatostatin- and angiogenin-like peptide receptor (G-protein coupled receptor salpr)
- 64350 Integrin, alpha d
  
- 245920 Chemokine (C-X-C motif) ligand 10
- 29538 Chemokine (C-C motif) ligand 20
- 114122 Chondroitin sulfate proteoglycan 2
- 305353 Toll-like receptor 6
- 64304 Acetyl-coenzyme A dehydrogenase, short chain
- 24367 Fibrinogen, gamma polypeptide
- 29339 Serum amyloid P-component
- 308716 Interleukin 20 receptor, alpha (predicted)
- 25585 Inhibitor of DNA binding 3
- 315108 Apolipoprotein I, 3
- 24153 Alpha-2-macroglobulin
- 25728 Apolipoprotein E
- 29328 Glutathione peroxidase 4
- 24889 Cholecystokinin A receptor
- 140868 Fatty acid binding protein 5, epidermal
- 25109 Cd1d1 antigen
- 25052 Protease, serine, 2
- 25333 Matrix Gla protein
- 83504 Klotho
- 24231 Complement component 2
- 56083 Transglutaminase 2, C polypeptide
- 25288 Acyl-CoA synthetase long-chain family member 1
- 59301 Ghrelin precursor
- 24536 Leptin receptor
- 117512 Complement component 9
- 117551 Chemokine (C-C motif) ligand 22
- 25608 Leptin
- 54349 Aldehyde oxidase 1

114099 Cysteinyl leukotriene receptor 1  
 25120 Arylalkylamine n-acetyltransferase  
 310553 Toll-like receptor 2  
 365901 Guanine nucleotide binding protein, alpha  
 transducing 2 (predicted)  
 306748 Chemokine (C-X-C motif) ligand 14  
 29427 Allograft inflammatory factor 1  
 24918 Signal transducer and activator of  
 transcription 5A  
 309900 Tubby like protein 1 (predicted)  
 24737 RT1 class Ib, locus AW2  
 295279 Fc receptor, IgG, high affinity I  
 24786 Superoxide dismutase 1  
 294245 Epididymal secretory protein 8  
 293677 EGF-containing fibulin-like extracellular  
 matrix protein 2  
 362119 Complement component 5  
 79224 Serine (or cysteine) proteinase inhibitor,  
 clade D, member 1  
 362076 Interleukin 1 family, member 8 (predicted)  
 81527 Neuropilin 2  
 84492 Tec protein tyrosine kinase  
 116689 Protein tyrosine phosphatase, non-receptor  
 type 6  
 54249 Adipsin  
 24337 V-erb-b2 erythroblastic leukemia viral  
 oncogene homolog 2, neuro/glioblastoma  
 derived oncogene homolog (avian)  
 25338 Ninjurin 1  
 116562 Interleukin 2  
 140936 Recoverin  
 79433 Myosin heavy chain 10, non-muscle  
 361795 Lymphotoxin B  
 116554 Mitogen-activated protein kinase 8  
 25105 Natriuretic peptide precursor type B  
 24237 Complement component 6  
 29160 Amelogenin X chromosome  
 24806 Tachykinin 1  
 24566 Macrophage stimulating 1 (hepatocyte  
 growth factor-like)  
 156767 Tumor necrosis factor receptor superfamily,  
 member 1b  
 298566 Complement component 1, q  
 subcomponent, alpha polypeptide  
 29624 Arachidonate 5-lipoxygenase activating

protein

116591 Fc receptor, IgG, low affinity III

294257 B-factor, properdin

84387 Peptidoglycan recognition protein 1

29687 Complement component 1, q subcomponent, beta polypeptide

171048 Tetraspanin 8

25374 Aminolevulinate, delta-, dehydratase

287910 Chemokine (C-C motif) ligand 6

304917 Serine (or cysteine) proteinase inhibitor, clade c (antithrombin), member 1

171551 Gene model 1960

25316 Membrane-spanning 4-domains, subfamily A, member 2

54243 Complement receptor related protein

294239 Dimethylarginine dimethylaminohydrolase 2

24472 Heat shock 70kd protein 1A

155012 Complement component factor H

29333 Membrane cofactor protein

29373 Bone morphogenetic protein 2

288001 Similar to alpha-1 major acute phase protein prepeptide

361205 Leukocyte cell-derived chemotaxin 2 (predicted)

362634 Complement component 1, q subcomponent, gamma polypeptide

245920 Chemokine (C-X-C motif) ligand 10

114122 Chondroitin sulfate proteoglycan 2

29538 Chemokine (C-C motif) ligand 20

305353 Toll-like receptor 6

64304 Acetyl-coenzyme A dehydrogenase, short chain

25723 Hypocretin

24367 Fibrinogen, gamma polypeptide

83783 Sulfotransferase family 1A, phenol-preferring, member 1

29339 Serum amyloid P-component

308716 Interleukin 20 receptor, alpha (predicted)

25585 Inhibitor of DNA binding 3

315108 Apolipoprotein I, 3

24153 Alpha-2-macroglobulin

25728 Apolipoprotein E

**GO:0006950~response to stress**

298317 Similar to ubiquitin-conjugating enzyme  
hr6a  
 259233 Glutathione peroxidase 6  
 29328 Glutathione peroxidase 4  
 24179 Angiotensinogen  
 25458 Glutathione synthetase  
 304577 Uracil-DNAglycosylase  
 140868 Fatty acid binding protein 5, epidermal  
 83504 Klotho  
 24231 Complement component 2  
 54302 Solute carrier family 14 (urea transporter),  
member 2  
 56083 Transglutaminase 2, C polypeptide  
 117512 Complement component 9  
 81751 Presenilin 2  
 117551 Chemokine (C-C motif) ligand 22  
 29610 Transforming growth factor, beta receptor  
III  
 54349 Aldehyde oxidase 1  
 114099 Cysteinyl leukotriene receptor 1  
 310553 Toll-like receptor 2  
 24925 Adrenergic receptor, beta 1  
 54251 Fms-like tyrosine kinase 1  
 25645 Adrenergic receptor, beta 3  
 29427 Allograft inflammatory factor 1  
 306748 Chemokine (C-X-C motif) ligand 14  
 24918 Signal transducer and activator of  
transcription 5A  
 24737 RT1 class Ib, locus AW2  
 295279 Fc receptor, IgG, high affinity I  
 24786 Superoxide dismutase 1  
 300850 Glutathione s-transferase, alpha 4  
 362339 cAMP responsive element binding protein  
3-like 2  
 300019 Gpi anchored molecule like protein  
(predicted)  
 294245 Epididymal secretory protein 8  
 293677 EGF-containing fibulin-like extracellular  
matrix protein 2  
 362119 Complement component 5  
 79224 Serine (or cysteine) proteinase inhibitor,  
clade D, member 1  
 362076 Interleukin 1 family, member 8 (predicted)  
 84492 Tec protein tyrosine kinase  
 116689 Protein tyrosine phosphatase, non-receptor

type 6  
 54249 Adipsin  
 24337 V-erb-b2 erythroblastic leukemia viral  
 oncogene homolog 2, neuro/glioblastoma  
 derived oncogene homolog (avian)  
 25338 Ninjurin 1  
 116562 Interleukin 2  
 79433 Myosin heavy chain 10, non-muscle  
 315344 Single-strand selective monofunctional  
 uracil DNA glycosylase  
 361795 Lymphotoxin b  
 116554 Mitogen-activated protein kinase 8  
 25105 Natriuretic peptide precursor type b  
 24237 Complement component 6  
 24674 Protein phosphatase 3, catalytic subunit,  
 alpha isoform  
 25420 Crystallin, alpha b  
 24806 Tachykinin 1  
 81823 Calcium and integrin binding 1 (calmyrin)  
 24566 Macrophage stimulating 1 (hepatocyte  
 growth factor-like)  
 156767 Tumor necrosis factor receptor superfamily,  
 member 1b  
 298566 Complement component 1, q  
 subcomponent, alpha polypeptide  
 29624 Arachidonate 5-lipoxygenase activating  
 protein  
 50622 Solute carrier family 23 (nucleobase  
 transporters), member 2  
 116591 Fc receptor, IgG, low affinity III  
 29541 Thymine glycol DNA glycosylase/ap lyase  
 (predicted)  
 294257 B-factor, properdin  
 29687 Complement component 1, q  
 subcomponent, beta polypeptide  
 361388 Growth factor receptor bound protein 2-  
 associated protein 1 (predicted)  
 171048 Tetraspanin 8  
 25307 Cystatin c  
 24506 Insulin 2  
 304917 Serine (or cysteine) proteinase inhibitor,  
 clade c (antithrombin), member 1  
 171551 Gene model 1960  
 25316 Membrane-spanning 4-domains, subfamily  
 A, member 2  
 54243 Complement receptor related protein

**GO:0048869~cellular  
developmental process**

294239 Dimethylarginine dimethylaminohydrolase  
2  
117254 Peroxiredoxin 1  
24472 Heat shock 70kd protein 1A  
155012 Complement component factor H  
29333 Membrane cofactor protein  
64470 Damage-specific DNA binding protein 1  
29373 Bone morphogenetic protein 2  
114089 Inositol polyphosphate-5-phosphatase E  
288001 Similar to alpha-1 major acute phase protein  
prepeptide  
117038 Metallothionein 3  
362634 Complement component 1, q  
subcomponent, gamma polypeptide  
  
89818 Vesicle-associated membrane protein 5  
  
56646 Lectin, galactose binding, soluble 1  
300678 Cd3 antigen, gamma polypeptide  
29252 Granzyme M (lymphocyte met-ase 1)  
24581 Myc-like oncogene, s-myc protein  
29542 Phosphatidylethanolamine binding protein  
94269 Fasciculation and elongation protein zeta 2  
(Zygin II)  
25585 Inhibitor of DNAbinding 3  
84353 Catenin (cadherin associated protein), beta  
1, 88kda  
25728 Apolipoprotein E  
116687 Deoxyribonuclease i-like 3  
50678 Phosphodiesterase 3a  
292263 F-box only protein 5 (predicted)  
361242 Dual specificity phosphatase 22 (predicted)  
24179 Angiotensinogen  
304577 Uracil-DNA glycosylase  
114090 Early growth response 2  
63879 Baculoviral IAP repeat-containing 4  
65189 Serine/threonine kinase 3 (ste20 homolog,  
yeast)  
83782 Expressed in non-metastatic cells 2  
81814 Thymosin, beta 4  
117512 Complement component 9  
315217 Plexin b2  
25608 Leptin  
29288 Ribosomal protein S3A  
24918 Signal transducer and activator of



transcription 5a

315190 Uroplakin 3a (predicted)

300019 Gpi anchored molecule like protein  
(predicted)

362119 Complement component 5

65146 Paired-iIg-like receptor b

287615 Vascular endothelial zinc finger 1  
(predicted)

304729 Gli-kruppel family member Gli2 (predicted)

24337 V-erb-b2 erythroblastic leukemia viral  
oncogene homolog 2, neuro/glioblastoma  
derived oncogene homolog (avian)

140433 Laminin, alpha 5

361795 Lymphotoxin B

85247 S100 calcium binding protein A6  
(calcyclin)

24237 Complement component 6

116554 Mitogen-activated protein kinase 8

29524 Lim motif-containing protein kinase 2

50669 Perforin 1 (pore forming protein)

81823 Calcium and integrin binding 1 (calmyrin)

287151 Similar to 1810034b16RIK protein

116591 Fc receptor, IgG, low affinity III

83620 Citron

80897 Type 1 tumor necrosis factor receptor  
shedding aminopeptidase regulator

25493 Nuclear factor of kappa light chain gene  
enhancer in B-cells inhibitor, alpha

25307 Cystatin C

24506 Insulin 2

25334 Muscle, intestine and stomach expression 1

287910 Chemokine (C-C motif) ligand 6

60335 Transglutaminase 1

306782 Receptor tyrosine kinase-like orphan  
receptor 2 (predicted)

29373 Bone morphogenetic protein 2

362525 Spermatocyte/spermatid-specific  
thioredoxin-3

294313 Mitochondrial carrier homolog 1 (c.  
Elegans)

29543 Tissue inhibitor of metalloproteinase 2

114122 Chondroitin sulfate proteoglycan 2

81512 Leukocyte cell derived chemotaxin 1

304935 T-box 19 (predicted)

117271 Bh3 interacting (with Bcl2 family) domain,

apoptosis agonist  
 64314 Caspase 2  
 246775 Tumor necrosis factor (ligand) superfamily,  
 member 10  
 315615 Down syndrome cell adhesion molecule-  
 like 1 (predicted)  
 64471 Evcetin-1  
 81827 Peptidase (prosome, macropain) 26s  
 subunit, ATPase 5  
 282840 Activating transcription factor 5  
 25730 Neurotrophin 5  
 315650 B-cell translocation gene 4  
 171528 Granzyme B  
 316137 EGF-like module containing, mucin-like,  
 hormone receptor-like sequence 1  
 24889 Cholecystokinin a receptor  
 25295 Bone gamma-carboxyglutamate protein 2  
 25109 Cd1d1 antigen  
 25311 Deleted in colorectal carcinoma  
 25333 Matrix gla protein  
 56083 Transglutaminase 2, C polypeptide  
 287931 Protein phosphatase 1f (Pp2c domain  
 containing)  
 81751 Presenilin 2  
 29610 Transforming growth factor, beta receptor  
 III  
 294204 Olfactory receptor 1750 (predicted)  
 56813 Parathyroid hormone receptor 1  
 25645 Adrenergic receptor, beta 3  
 54251 Fms-like tyrosine kinase 1  
 24925 Adrenergic receptor, beta 1  
 83466 Cadherin EGF lag seven-pass g-type  
 receptor 3  
 29427 Allograft inflammatory factor 1  
 362791 Cd27 binding protein (hindu god of  
 destruction)  
 24737 RT1 class Ib, locus AW2  
 295279 Fc receptor, IgG, high affinity I  
 24786 Superoxide dismutase 1  
 64521 Tetraspan 2  
 362993 Rho family GTPase 1  
 116646 Tumor protein, translationally-controlled 1  
 364680 Barh-like homeobox 1 (predicted)  
 81527 Neuropilin 2  
 171114 N-myc downstream regulated gene 2

116689 Protein tyrosine phosphatase, non-receptor  
type 6  
245963 EGF-like domain 7  
116562 Interleukin 2  
79433 Myosin heavy chain 10, non-muscle  
304109 T-cell lymphoma invasion and metastasis 1  
25420 Crystallin, alpha B  
84403 Gap junction membrane channel protein  
beta 6  
114501 Lim homeobox transcription factor 1 beta  
29317 Cysteine and glycine-rich protein 2  
304798 Transformed mouse 3T3 cell double minute  
4  
295213 S100 calcium binding protein a13  
(predicted)  
156767 Tumor necrosis factor receptor superfamily,  
member 1b  
113955 Glycoprotein (transmembrane) nmb  
366492 Eph receptor A2 (predicted)  
296973 2,3-bisphosphoglycerate mutase  
25163 Cyclin-dependent kinase inhibitor 2A  
305858 Orthodenticle homolog 2 (drosophila)  
24472 Heat shock 70kd protein 1A  
56782 Proteoglycan peptide core protein  
116647 Neuroligin 1  
117038 Metallothionein 3  
29236 Laminin receptor 1 (ribosomal protein sa)  
24715 Renin 1

**Supplemental Table 4:** List of Genes regulated in the microarray experiment within the prefrontal cortex following DOI (DOI vs. C). Rats were treated with the 5HT<sub>2A/C</sub> antagonist, DOI or vehicle and the prefrontal cortex was subjected to microarray analysis. The list of all the significantly regulated genes is shown in the table ( $P < 0.05$ ; Fold change  $< 0.66$  or  $> 1.5$ ).

| GeneName           | Ratio_D | t-test<br>P-value | Synonyms     | Description                                                                                              |
|--------------------|---------|-------------------|--------------|----------------------------------------------------------------------------------------------------------|
| AA818888           | 1.51    | 0.00              | AA818888     | cDNA clone UI-R-A0-av-c-08-0-UI 3' similar to emb                                                        |
| AA819418           | 2.00    | 0.00              | AA819418     | cDNA clone UI-R-A0-bl-f-10-0-UI 3' similar to emb                                                        |
| AA859222           | 1.61    | 0.01              | AA859222     | cDNA clone UI-R-E0-cd-b-07-0-UI 3' similar to emb                                                        |
| AA874977           | 1.57    | 0.02              | AA874977     | cDNA clone UI-R-E0-cf-c-01-0-UI 3' similar to gi                                                         |
| AA892264           | 1.90    | 0.02              | AA892264     | cDNA clone RKIAO36 3'                                                                                    |
| AA925023           | 1.76    | 0.00              | AA925023     | cDNA clone UI-R-A1-ei-g-02-0-UI 3' similar to gi                                                         |
| AA996504           | 2.38    | 0.02              | AA996504     | cDNA clone UI-R-C0-he-b-07-0-UI 3'                                                                       |
| Abra               | 1.94    | 0.00              | NM_175844    | actin-binding Rho activating protein                                                                     |
| Accn3              | 1.95    | 0.01              | NM_173135    | amiloride-sensitive cation channel 3                                                                     |
| Acox1              | 1.61    | 0.00              | NM_017340    | acyl-Coenzyme A oxidase 1, palmitoyl                                                                     |
| Acp6               | 1.52    | 0.00              | NM_001031645 | acid phosphatase 6, lysophosphatidic                                                                     |
| Adamts3_predicted  | 2.48    | 0.02              | XM_223279    | a disintegrin-like and metalloprotease (reprolysin type) with thrombospondin type 1 motif, 3 (predicted) |
| Adamts9_predicted  | 3.58    | 0.00              | XM_232202    | similar to a disintegrin-like and metalloprotease with thrombospondin type 1 motifs 9B                   |
| Adamtsl3_predicted | 3.42    | 0.00              | XM_218841    | ADAMTS-like 3 (predicted)                                                                                |
| Add2               | 1.82    | 0.00              | NM_012491    | adducin 2 (beta)                                                                                         |
| Adora3             | 1.90    | 0.00              | NM_012896    | adenosine A3 receptor                                                                                    |
| Afp                | 1.79    | 0.00              | NM_012493    | alpha-fetoprotein                                                                                        |
| Ahsa2_predicted    | 1.70    | 0.02              | XM_223680    | activator of heat shock protein ATPase homolog 2 (yeast) (predicted)                                     |
| AI014087           | 2.12    | 0.00              | AI014087     | cDNA clone RSPBE69 3' end                                                                                |
| AI170772           | 2.34    | 0.00              | AI170772     | cDNA clone RMUBB32 3' end                                                                                |
| AI171274           | 2.32    | 0.04              | AI171274     | cDNA clone RMUBI41 3' end                                                                                |
| AI233749           | 1.55    | 0.01              | AI233749     | cDNA clone RKIDJ59 3' end                                                                                |
| Akr1c18            | 1.86    | 0.03              | NM_138510    | aldo-keto reductase family 1, member C18                                                                 |
| Alg5               | 4.01    | 0.00              | NM_001025407 | asparagine-linked glycosylation 5 homolog (yeast, dolichyl-phosphate beta-                               |

|                    |             |             |              |                                                                           |
|--------------------|-------------|-------------|--------------|---------------------------------------------------------------------------|
|                    |             |             |              | glucosyltransferase)                                                      |
| Ankrd12_predicted  | <b>1.54</b> | <b>0.04</b> | XM_237588    | ankyrin repeat domain 12 (predicted)                                      |
| Anp32a             | <b>1.59</b> | <b>0.00</b> | NM_012903    | acidic (leucine-rich) nuclear phosphoprotein 32 family, member A          |
| Ap3d1              | <b>1.94</b> | <b>0.00</b> | XM_234908    | adaptor-related protein complex 3, delta 1 subunit                        |
| Ap3m1              | <b>1.51</b> | <b>0.00</b> | NM_133593    | adaptor-related protein complex 3, mu 1 subunit                           |
| Apc                | <b>1.53</b> | <b>0.00</b> | NM_012499    | adenomatosis polyposis coli                                               |
| Apeg3              | <b>1.57</b> | <b>0.00</b> | XM_218226    | similar to mKIAA0287 protein                                              |
| Apeh               | <b>1.53</b> | <b>0.00</b> | NM_012500    | acylpeptide hydrolase                                                     |
| Apoh               | <b>2.33</b> | <b>0.00</b> | NM_001009626 | apolipoprotein H                                                          |
| Apol3              | <b>1.73</b> | <b>0.02</b> | NM_001013175 | apolipoprotein L, 3                                                       |
| Aqp1               | <b>1.89</b> | <b>0.02</b> | NM_012778    | aquaporin 1                                                               |
| Aqp3               | <b>1.74</b> | <b>0.03</b> | NM_031703    | aquaporin 3                                                               |
| Aqp7               | <b>1.87</b> | <b>0.01</b> | NM_019157    | aquaporin 7                                                               |
| Arc                | <b>2.31</b> | <b>0.01</b> | NM_019361    | activity regulated cytoskeletal-associated protein                        |
| Arl4a              | <b>1.71</b> | <b>0.00</b> | NM_019186    | ADP-ribosylation factor-like 4A                                           |
| Art5               | <b>2.54</b> | <b>0.04</b> | NM_001013039 | ADP-ribosyltransferase 5                                                  |
| Arts1              | <b>1.61</b> | <b>0.00</b> | NM_030836    | type 1 tumor necrosis factor receptor shedding aminopeptidase regulator   |
| Asah31_predicted   | <b>1.55</b> | <b>0.01</b> | XM_233138    | N-acylsphingosine amidohydrolase 3-like (predicted)                       |
| Ascc3_predicted    | <b>1.60</b> | <b>0.01</b> | XM_228345    | activating signal cointegrator 1 complex subunit 3 (predicted)            |
| Atf3               | <b>3.40</b> | <b>0.00</b> | NM_012912    | activating transcription factor 3                                         |
| Atf4               | <b>1.54</b> | <b>0.00</b> | NM_024403    | activating transcription factor 4                                         |
| Atp6ap1            | <b>1.51</b> | <b>0.00</b> | NM_031785    | ATPase, H <sup>+</sup> transporting, lysosomal accessory protein 1        |
| Atp6v1b1_predicted | <b>1.67</b> | <b>0.01</b> | XM_232119    | ATPase, H transporting, lysosomal V1 subunit B1 (predicted)               |
| Atp7a              | <b>1.57</b> | <b>0.02</b> | NM_052803    | ATPase, Cu <sup>++</sup> transporting, alpha polypeptide                  |
| Atxn1              | <b>1.59</b> | <b>0.01</b> | NM_012726    | ataxin 1                                                                  |
| B3gnt1_predicted   | <b>1.53</b> | <b>0.00</b> | XM_223674    | UDP-GlcNAc:betaGal beta-1,3-N-acetylglucosaminyltransferase 1 (predicted) |
| Baz1a_predicted    | <b>1.80</b> | <b>0.03</b> | XM_234156    | bromodomain adjacent to zinc finger domain, 1A (predicted)                |
| Bcl2l2             | <b>1.54</b> | <b>0.00</b> | NM_021850    | Bcl2-like 2                                                               |
| Bcl6_predicted     | <b>1.69</b> | <b>0.00</b> | XM_221333    | B-cell leukemia/lymphoma 6 (predicted)                                    |
| Bdnf               | <b>1.78</b> | <b>0.00</b> | NM_012513    | brain derived neurotrophic factor                                         |

|                   |             |             |                  |                                                                                                  |
|-------------------|-------------|-------------|------------------|--------------------------------------------------------------------------------------------------|
| Bdp1_predicted    | <b>1.65</b> | <b>0.01</b> | XM_226738        | B double prime 1, subunit of RNA polymerase III transcription initiation factor IIIB (predicted) |
| BE113966          | <b>2.11</b> | <b>0.00</b> | BE113966         | cDNA clone UI-R-BJ1-awi-e-05-0-UI 3'                                                             |
| Bglap2            | <b>1.86</b> | <b>0.04</b> | NM_013414        | bone gamma-carboxyglutamate protein 2                                                            |
| BI281080          | <b>2.10</b> | <b>0.02</b> | BI281080         | cDNA clone UI-R-DD0-bzr-a-04-0-UI 3'                                                             |
| Birc2             | <b>1.61</b> | <b>0.05</b> | NM_021752        | baculoviral IAP repeat-containing 2                                                              |
| BM384018          | <b>2.80</b> | <b>0.00</b> | BM384018         | cDNA clone UI-R-DM1-ckb-g-10-0-UI 3'                                                             |
| BQ201138          | <b>2.33</b> | <b>0.00</b> | BQ201138         | cDNA clone UI-R-DQ1-clt-c-17-0-UI 3'                                                             |
| Brinp2            | <b>1.62</b> | <b>0.00</b> | NM_173115        | BMP/retinoic acid-inducible neural-specific protein 2                                            |
| Bst2              | <b>2.01</b> | <b>0.02</b> | NM_198134        | bone marrow stromal cell antigen 2                                                               |
| C4bpa             | <b>1.75</b> | <b>0.04</b> | NM_012516        | complement component 4 binding protein, alpha                                                    |
| Cacnb2            | <b>1.91</b> | <b>0.00</b> | NM_053851        | calcium channel, voltage-dependent, beta 2 subunit                                               |
| Calr              | <b>1.58</b> | <b>0.02</b> | NM_022399        | calreticulin                                                                                     |
| Casp6             | <b>1.64</b> | <b>0.00</b> | NM_031775        | caspase 6                                                                                        |
| Cbl11_predicted   | <b>1.84</b> | <b>0.00</b> | XM_234039        | Casitas B-lineage lymphoma-like 1 (predicted)                                                    |
| Ccl6              | <b>1.74</b> | <b>0.02</b> | NM_00100420<br>2 | chemokine (C-C motif) ligand 6                                                                   |
| Ccng1             | <b>5.68</b> | <b>0.00</b> | NM_012923        | cyclin G1                                                                                        |
| Ccn11             | <b>1.78</b> | <b>0.02</b> | NM_053662        | cyclin L1                                                                                        |
| Cd44              | <b>2.55</b> | <b>0.00</b> | NM_012924        | CD44 antigen                                                                                     |
| Cd79b             | <b>1.57</b> | <b>0.05</b> | NM_133533        | CD79B antigen                                                                                    |
| Cebpb             | <b>1.63</b> | <b>0.00</b> | NM_024125        | CCAAT/enhancer binding protein (C/EBP), beta                                                     |
| Cebpd             | <b>2.61</b> | <b>0.01</b> | NM_013154        | CCAAT/enhancer binding protein (C/EBP), delta                                                    |
| Cenpc1            | <b>1.74</b> | <b>0.01</b> | NM_00100409<br>8 | centromere protein C 1                                                                           |
| Cfhl1             | <b>2.36</b> | <b>0.01</b> | AY325206         | Ab2-142                                                                                          |
| Ch25h             | <b>2.46</b> | <b>0.03</b> | NM_00102541<br>5 | cholesterol 25-hydroxylase                                                                       |
| Chordc1_predicted | <b>1.68</b> | <b>0.01</b> | XM_235878        | cysteine and histidine-rich domain (CHORD)-containing, zinc-binding protein 1 (predicted)        |
| Cited2            | <b>2.05</b> | <b>0.00</b> | NM_053698        | Cbp/p300-interacting transactivator, with Glu/Asp-rich carboxy-terminal domain, 2                |
| Cldn1             | <b>2.09</b> | <b>0.02</b> | NM_031699        | claudin 1                                                                                        |
| Clk1              | <b>1.80</b> | <b>0.01</b> | XM_217405        | CDC-like kinase 1                                                                                |
| Clk4              | <b>1.60</b> | <b>0.03</b> | NM_00101304<br>1 | CDC like kinase 4                                                                                |
| Cngb1             | <b>1.99</b> | <b>0.03</b> | NM_031809        | cyclic nucleotide gated channel beta 1                                                           |
| Cnot4             | <b>1.70</b> | <b>0.00</b> | NM_00103778<br>2 | CCR4-NOT transcription complex, subunit 4                                                        |

|                  |             |             |              |                                                                   |
|------------------|-------------|-------------|--------------|-------------------------------------------------------------------|
| Col15a1          | <b>2.96</b> | <b>0.01</b> | XM_216399    | procollagen, type XV                                              |
| Col4a1           | <b>1.58</b> | <b>0.01</b> | XM_214400    | procollagen, type IV, alpha 1                                     |
| Comp             | <b>3.18</b> | <b>0.00</b> | NM_012834    | cartilage oligomeric matrix protein                               |
| Cox4i2           | <b>1.53</b> | <b>0.00</b> | NM_053472    | cytochrome c oxidase subunit IV isoform 2                         |
| Cpeb4_predicted  | <b>1.54</b> | <b>0.03</b> | XM_220269    | cytoplasmic polyadenylation element binding protein 4 (predicted) |
| Crebbp           | <b>1.54</b> | <b>0.00</b> | NM_133381    | CREB binding protein                                              |
| Cryab            | <b>1.98</b> | <b>0.00</b> | NM_012935    | crystallin, alpha B                                               |
| Cryge            | <b>1.72</b> | <b>0.02</b> | NM_173289    | crystallin, gamma E                                               |
| Csnk1g1          | <b>1.77</b> | <b>0.02</b> | NM_022288    | casein kinase 1, gamma 1                                          |
| Csta_predicted   | <b>3.21</b> | <b>0.01</b> | XM_213616    | cystatin A (stefin A) (predicted)                                 |
| Ctnnd1_predicted | <b>1.55</b> | <b>0.00</b> | XM_242062    | catenin (cadherin associated protein), delta 1 (predicted)        |
| Ctsj             | <b>2.85</b> | <b>0.00</b> | NM_017121    | cathepsin J                                                       |
| Cxcr3            | <b>2.41</b> | <b>0.03</b> | NM_053415    | chemokine (C-X-C motif) receptor 3                                |
| Cyb5             | <b>1.54</b> | <b>0.00</b> | NM_022245    | cytochrome b-5                                                    |
| Cyp7b1           | <b>1.76</b> | <b>0.00</b> | XM_342218    | cytochrome P450, family 7, subfamily b, polypeptide 1             |
| Cyr61            | <b>2.39</b> | <b>0.00</b> | NM_031327    | cysteine rich protein 61                                          |
| Dnah10           | <b>1.62</b> | <b>0.03</b> | XM_001071882 | dynein, axonemal, heavy polypeptide 10                            |
| Dnah9            | <b>1.83</b> | <b>0.04</b> | XM_213354    | dynein, axonemal, heavy polypeptide 9                             |
| Dpt_predicted    | <b>2.24</b> | <b>0.04</b> | XM_213925    | dermatopontin (predicted)                                         |
| Dpyd             | <b>1.91</b> | <b>0.01</b> | NM_031027    | dihydropyrimidine dehydrogenase                                   |
| Duox2            | <b>1.79</b> | <b>0.03</b> | NM_024141    | dual oxidase 2                                                    |
| Dusp6            | <b>1.93</b> | <b>0.00</b> | NM_053883    | dual specificity phosphatase 6                                    |
| DV728383         | <b>1.73</b> | <b>0.00</b> | DV728383     | RVL21016 Wackym-Soares normalized rat vestibular cDNA 5'          |
| DY320879         | <b>1.52</b> | <b>0.00</b> | DY320879     | cDNA clone IMAGE:8366768 5'                                       |
| Dysf_predicted   | <b>1.80</b> | <b>0.01</b> | XM_232123    | dysferlin (predicted)                                             |
| Ebf1             | <b>1.72</b> | <b>0.00</b> | NM_053820    | early B-cell factor 1                                             |
| Edg7             | <b>2.07</b> | <b>0.02</b> | NM_023969    | putative G protein-coupled receptor snGPCR32                      |
| Egr2             | <b>1.98</b> | <b>0.00</b> | NM_053633    | early growth response 2                                           |
| Eif5b            | <b>1.66</b> | <b>0.04</b> | XM_218162    | eukaryotic translation initiation factor 5B, transcript variant 2 |
| Ela3b_predicted  | <b>1.72</b> | <b>0.01</b> | XM_216566    | elastase 3B, pancreatic (predicted)                               |
| Elk1             | <b>3.70</b> | <b>0.03</b> | BG377323     | cDNA clone UI-R-CU0-bvc-b-03-0-UI 3',                             |
| F2rl1            | <b>1.92</b> | <b>0.05</b> | NM_053897    | coagulation factor II (thrombin) receptor-like 1                  |
| Fbxo39           | <b>1.95</b> | <b>0.00</b> | NM_001039018 | F-box protein 39                                                  |
| Fgf1             | <b>1.61</b> | <b>0.01</b> | NM_012846    | fibroblast growth factor 1                                        |
| Fmo2             | <b>2.44</b> | <b>0.01</b> | NM_144737    | flavin containing monooxygenase 2                                 |
| Fmo3             | <b>1.56</b> | <b>0.02</b> | NM_053433    | flavin containing monooxygenase 3                                 |

|                |             |             |                  |                                                                     |
|----------------|-------------|-------------|------------------|---------------------------------------------------------------------|
| Fn1            | <b>1.69</b> | <b>0.00</b> | NM_019143        | fibronectin 1                                                       |
| Fos            | <b>1.69</b> | <b>0.00</b> | NM_022197        | FBJ murine osteosarcoma viral oncogene homolog                      |
| Foxa2          | <b>1.76</b> | <b>0.00</b> | NM_012743        | forkhead box A2                                                     |
| Fshb           | <b>2.80</b> | <b>0.03</b> | M36804           | follicle stimulating hormone beta-subunit                           |
| Fzd1           | <b>1.76</b> | <b>0.00</b> | NM_021266        | frizzled homolog 1 (Drosophila)                                     |
| G0s2           | <b>1.51</b> | <b>0.03</b> | NM_00100963<br>2 | G0/G1 switch gene 2                                                 |
| Gabbr1         | <b>1.93</b> | <b>0.01</b> | NM_017291        | gamma-aminobutyric acid (GABA-C) receptor, subunit rho 1            |
| Gadd45g        | <b>2.29</b> | <b>0.00</b> | XM_237999        | growth arrest and DNA-damage-inducible 45 gamma                     |
| Gata4          | <b>1.60</b> | <b>0.00</b> | NM_144730        | GATA binding protein 4                                              |
| Gbp4_predicted | <b>2.65</b> | <b>0.03</b> | XM_227762        | guanylate nucleotide binding protein 4 (predicted)                  |
| Gdf8           | <b>1.53</b> | <b>0.01</b> | NM_019151        | growth differentiation factor 8                                     |
| Gfra3          | <b>1.93</b> | <b>0.02</b> | NM_053398        | glial cell line derived neurotrophic factor family receptor alpha 3 |
| Gja5           | <b>2.43</b> | <b>0.05</b> | NM_019280        | gap junction membrane channel protein alpha 5                       |
| Gnai3          | <b>1.71</b> | <b>0.01</b> | NM_013106        | guanine nucleotide binding protein, alpha inhibiting 3              |
| Gnb3           | <b>1.71</b> | <b>0.00</b> | NM_021858        | guanine nucleotide binding protein, beta 3                          |
| Gnl3           | <b>1.57</b> | <b>0.00</b> | NM_175580        | guanine nucleotide binding protein-like 3 (nucleolar)               |
| Gpc2           | <b>1.60</b> | <b>0.00</b> | NM_138511        | glypican 2 (cerebroglycan)                                          |
| Gpm6b          | <b>1.55</b> | <b>0.00</b> | NM_138846        | glycoprotein m6b                                                    |
| Gpr44          | <b>2.19</b> | <b>0.00</b> | NM_00101207<br>0 | G protein-coupled receptor 44                                       |
| Grin2d         | <b>1.64</b> | <b>0.03</b> | NM_022797        | glutamate receptor, ionotropic, N-methyl D-aspartate 2D             |
| Grin3b         | <b>1.71</b> | <b>0.03</b> | NM_133308        | glutamate receptor, ionotropic, N-methyl-D-aspartate 3B             |
| Grin1a         | <b>1.71</b> | <b>0.00</b> | NM_183402        | glutamate receptor, ionotropic, N-methyl D-aspartate-like 1A        |
| Grm1           | <b>1.56</b> | <b>0.00</b> | NM_017011        | glutamate receptor, metabotropic 1                                  |
| Gtpbp4         | <b>1.67</b> | <b>0.00</b> | NM_053689        | GTP binding protein 4                                               |
| Gyk            | <b>1.59</b> | <b>0.04</b> | NM_024381        | glycerol kinase                                                     |
| Gys2           | <b>1.98</b> | <b>0.00</b> | NM_013089        | glycogen synthase 2                                                 |
| Habp2          | <b>1.81</b> | <b>0.01</b> | NM_00100150<br>5 | hyaluronic acid binding protein 2                                   |
| Hbegf          | <b>1.79</b> | <b>0.04</b> | NM_012945        | heparin-binding EGF-like growth factor                              |
| Helz_predicted | <b>1.51</b> | <b>0.03</b> | XM_237808        | helicase with zinc finger domain (predicted)                        |
| Hmgn3          | <b>1.60</b> | <b>0.03</b> | NM_00100702<br>0 | high mobility group nucleosomal binding domain 3                    |
| Hnrpf          | <b>1.65</b> | <b>0.00</b> | NM_022397        | heterogeneous nuclear ribonucleoprotein F,                          |



|                  |             |             |              |                                                                                           |
|------------------|-------------|-------------|--------------|-------------------------------------------------------------------------------------------|
|                  |             |             |              | transcript variant 3                                                                      |
| Hnrpu            | <b>1.55</b> | <b>0.00</b> | NM_057139    | heterogeneous nuclear ribonucleoprotein U                                                 |
| Hpgd             | <b>1.67</b> | <b>0.00</b> | NM_024390    | hydroxyprostaglandin dehydrogenase 15 (NAD)                                               |
| Hrasls_predicted | <b>2.35</b> | <b>0.04</b> | XM_213590    | HRAS-like suppressor (predicted)                                                          |
| Hrasls3          | <b>1.56</b> | <b>0.03</b> | NM_017060    | HRAS like suppressor 3                                                                    |
| Hspa5            | <b>1.82</b> | <b>0.00</b> | NM_013083    | heat shock 70kDa protein 5 (glucose-regulated protein)                                    |
| Hspb1            | <b>2.83</b> | <b>0.04</b> | NM_031970    | heat shock 27kDa protein 1                                                                |
| Hspca            | <b>1.57</b> | <b>0.00</b> | NM_175761    | heat shock protein 1, alpha                                                               |
| Hspe1            | <b>1.52</b> | <b>0.00</b> | NM_012966    | heat shock 10 kDa protein 1 (chaperonin 10)                                               |
| Htr1d            | <b>1.63</b> | <b>0.04</b> | NM_012852    | 5-hydroxytryptamine (serotonin) receptor 1D                                               |
| Htr2b            | <b>1.74</b> | <b>0.03</b> | NM_017250    | 5-hydroxytryptamine (serotonin) receptor 2B                                               |
| Icam5_predicted  | <b>1.57</b> | <b>0.03</b> | XM_233737    | intercellular adhesion molecule 5, telencephalin (predicted)                              |
| Ier2             | <b>1.68</b> | <b>0.00</b> | NM_001009541 | immediate early response 2                                                                |
| Ikbkg            | <b>2.08</b> | <b>0.04</b> | NM_199103    | inhibitor of kappaB kinase gamma                                                          |
| Il1rl2           | <b>2.37</b> | <b>0.00</b> | NM_133575    | interleukin 1 receptor-like 2                                                             |
| Il24             | <b>1.63</b> | <b>0.03</b> | NM_133311    | interleukin 24                                                                            |
| Inhba            | <b>1.52</b> | <b>0.02</b> | NM_017128    | inhibin beta-A                                                                            |
| Inhbc            | <b>1.90</b> | <b>0.02</b> | NM_022614    | inhibin beta C                                                                            |
| Inpp4b           | <b>1.88</b> | <b>0.00</b> | NM_053917    | inositol polyphosphate-4-phosphatase, type II                                             |
| Inpp5e           | <b>2.56</b> | <b>0.00</b> | XM_342391    | inositol polyphosphate 5-phosphatase                                                      |
| Itga2            | <b>1.50</b> | <b>0.00</b> | XM_345156    | integrin, alpha 2                                                                         |
| Itpr1            | <b>1.51</b> | <b>0.00</b> | NM_001007235 | inositol 1,4,5-triphosphate receptor 1                                                    |
| Jun              | <b>2.10</b> | <b>0.00</b> | NM_021835    | Jun oncogene                                                                              |
| Junb             | <b>1.53</b> | <b>0.00</b> | NM_021836    | Jun-B oncogene                                                                            |
| K02813           | <b>1.98</b> | <b>0.00</b> | K02813       | glucagon gene, exon 6                                                                     |
| Kcna2            | <b>2.40</b> | <b>0.01</b> | NM_012970    | potassium voltage-gated channel, shaker-related subfamily, member 2                       |
| Kcnh4            | <b>1.66</b> | <b>0.02</b> | NM_053630    | potassium voltage-gated channel, subfamily H (eag-related), member 4                      |
| Kcnn2            | <b>1.70</b> | <b>0.01</b> | NM_019314    | potassium intermediate/small conductance calcium-activated channel, subfamily N, member 2 |
| Kif3b_predicted  | <b>2.00</b> | <b>0.04</b> | XM_215883    | kinesin family member 3B (predicted)                                                      |
| Kir3dl1          | <b>1.54</b> | <b>0.03</b> | NM_181479    | killer cell immunoglobulin-like receptor, three domains, long cytoplasmic tail,           |
| Klf4             | <b>2.62</b> | <b>0.00</b> | NM_053713    | Kruppel-like factor 4 (gut)                                                               |
| Klk12_predicted  | <b>1.78</b> | <b>0.00</b> | XM_218644    | kallikrein 12 (predicted)                                                                 |

|           |             |             |              |                                                                                                         |
|-----------|-------------|-------------|--------------|---------------------------------------------------------------------------------------------------------|
| Klk5      | <b>1.76</b> | <b>0.00</b> | XM_574439    | kallikrein 5                                                                                            |
| Klrc2     | <b>1.80</b> | <b>0.01</b> | NM_019261    | killer cell lectin-like receptor subfamily C, member 2                                                  |
| Krt1-4    | <b>1.70</b> | <b>0.04</b> | NM_001008758 | keratin complex 1, acidic, gene 4                                                                       |
| L04739    | <b>2.75</b> | <b>0.04</b> | L04739       | plasma membrane calcium ATPase isoform 1                                                                |
| Lama5     | <b>1.57</b> | <b>0.00</b> | XM_215963    | laminin, alpha 5                                                                                        |
| Lamb3     | <b>1.58</b> | <b>0.00</b> | XM_223087    | similar to Lamb3 protein                                                                                |
| Lcn7      | <b>1.54</b> | <b>0.01</b> | NM_053582    | lipocalin 7                                                                                             |
| Lepr      | <b>1.74</b> | <b>0.00</b> | NM_012596    | leptin receptor                                                                                         |
| Lhx3      | <b>1.63</b> | <b>0.00</b> | XM_001059910 | LIM homeobox protein 3                                                                                  |
| Lipc      | <b>2.41</b> | <b>0.02</b> | NM_012597    | lipase, hepatic                                                                                         |
| LOC246266 | <b>2.85</b> | <b>0.03</b> | NM_144750    | lysophospholipase                                                                                       |
| LOC314393 | <b>1.58</b> | <b>0.02</b> | XM_001065684 | similar to thyroid hormone receptor interactor 11                                                       |
| LOC367314 | <b>2.09</b> | <b>0.00</b> | NM_001014269 | similar to FLI-LRR associated protein-1                                                                 |
| LOC498185 | <b>1.57</b> | <b>0.01</b> | NM_001017488 | similar to sodium/calcium exchanger protein                                                             |
| LOC502603 | <b>1.52</b> | <b>0.02</b> | NM_001035255 | similar to splicing factor p54                                                                          |
| LOC678807 | <b>1.94</b> | <b>0.05</b> | XM_001053242 | similar to alpha-interferon                                                                             |
| LOC679712 | <b>1.63</b> | <b>0.00</b> | XM_001054154 | similar to Myelin expression factor 2                                                                   |
| LOC680097 | <b>2.08</b> | <b>0.00</b> | XM_001055696 | similar to germinal histone H4 gene                                                                     |
| LOC680102 | <b>1.85</b> | <b>0.00</b> | XM_001055031 | similar to mab-21-like 2                                                                                |
| LOC680117 | <b>1.50</b> | <b>0.00</b> | XM_001054603 | similar to T-cell leukemia homeobox protein 2 (Homeobox protein Hox-11L1)                               |
| LOC680404 | <b>1.87</b> | <b>0.00</b> | XM_001057045 | similar to Complement C1q-like protein 3 precursor (Gliacolin)                                          |
| LOC680537 | <b>1.69</b> | <b>0.00</b> | XM_001058413 | similar to Wolf-Hirschhorn syndrome candidate 1 protein isoform 1, transcript variant 2                 |
| LOC680611 | <b>2.85</b> | <b>0.02</b> | XM_001057993 | similar to B-cell leukemia/lymphoma 3                                                                   |
| LOC680945 | <b>1.80</b> | <b>0.01</b> | XM_001059596 | similar to stromal cell-derived factor 2-like 1                                                         |
| LOC681467 | <b>2.06</b> | <b>0.01</b> | XM_001057746 | similar to Beta crystallin S (Gamma crystallin S)                                                       |
| LOC681867 | <b>1.58</b> | <b>0.00</b> | XM_001056889 | similar to NADH-ubiquinone oxidoreductase PDSW subunit (Complex I-PDSW) (CI-PDSW), transcript variant 2 |

|                  |             |             |              |                                                                  |
|------------------|-------------|-------------|--------------|------------------------------------------------------------------|
| LOC682196        | <b>1.53</b> | <b>0.01</b> | XM_001060366 | similar to ribosomal protein S12                                 |
| LOC691291        | <b>2.80</b> | <b>0.00</b> | XM_001077581 | similar to peptidoglycan recognition protein 2                   |
| Lsamp            | <b>1.72</b> | <b>0.00</b> | NM_017242    | limbic system-associated membrane protein                        |
| Luc7l            | <b>1.81</b> | <b>0.00</b> | NM_001024269 | LUC7-like ( <i>S. cerevisiae</i> )                               |
| Ly6g6e           | <b>1.84</b> | <b>0.02</b> | NM_001001972 | lymphocyte antigen 6 complex, locus G6E                          |
| Ly9_predicted    | <b>2.09</b> | <b>0.00</b> | XM_222892    | lymphocyte antigen 9 (predicted)                                 |
| M23948           | <b>1.93</b> | <b>0.01</b> | M23948       | carboxypeptidase B gene, intron 1, middle region A               |
| Map3k6_predicted | <b>2.41</b> | <b>0.01</b> | XM_232732    | mitogen-activated protein kinase kinase kinase 6 (predicted)     |
| Map3k8           | <b>3.28</b> | <b>0.00</b> | NM_053847    | mitogen-activated protein kinase kinase kinase 8                 |
| Mcee_predicted   | <b>1.68</b> | <b>0.00</b> | XM_215213    | methylmalonyl CoA epimerase (predicted)                          |
| Mepe             | <b>1.52</b> | <b>0.00</b> | NM_024142    | matrix extracellular phosphoglycoprotein with ASARM motif (bone) |
| MGC109519        | <b>1.96</b> | <b>0.03</b> | NM_001024345 | similar to tropomyosin 1, embryonic fibroblast -                 |
| MGC95208         | <b>2.40</b> | <b>0.00</b> | NM_001005552 | similar to 4930453N24Rik protein                                 |
| Mgl1             | <b>2.70</b> | <b>0.04</b> | NM_022393    | macrophage galactose N-acetyl-galactosamine specific lectin 1    |
| Mia1             | <b>1.83</b> | <b>0.02</b> | NM_030852    | melanoma inhibitory activity 1                                   |
| Mll_mapped       | <b>1.74</b> | <b>0.03</b> | XM_236194    | myeloid/lymphoid or mixed-lineage leukemia (mapped)              |
| Mmp12            | <b>2.13</b> | <b>0.01</b> | NM_053963    | matrix metalloproteinase 12                                      |
| Mpdz             | <b>1.50</b> | <b>0.00</b> | NM_019196    | multiple PDZ domain protein                                      |
| Mpp4             | <b>2.08</b> | <b>0.01</b> | AB030501     | DLG6 gamma,                                                      |
| Mrgprb2          | <b>2.28</b> | <b>0.04</b> | NM_001002285 | MAS-related G protein-coupled receptor, member B2                |
| Mrgprb4          | <b>1.82</b> | <b>0.04</b> | NM_001002287 | MAS-related G protein-coupled receptor, member B4                |
| Mrgprb5          | <b>1.99</b> | <b>0.00</b> | NM_001002284 | MAS-related G protein-coupled receptor, member B5                |
| Mrgprh           | <b>3.25</b> | <b>0.00</b> | NM_001002281 | MAS-related G-protein coupled receptor, member H                 |
| Mrps25           | <b>1.52</b> | <b>0.00</b> | NM_001025408 | mitochondrial ribosomal protein S25                              |
| Ms4a12_predicted | <b>3.39</b> | <b>0.01</b> | XM_219588    | membrane-spanning 4-domains, subfamily A, member 12 (predicted)  |
| Ms4a6a_predicted | <b>1.65</b> | <b>0.03</b> | XM_215145    | membrane-spanning 4-domains, subfamily A, member 6A (predicted)  |
| Msx1             | <b>1.82</b> | <b>0.04</b> | NM_031059    | homeo box, msh-like 1                                            |

|                   |             |             |              |                                                                        |
|-------------------|-------------|-------------|--------------|------------------------------------------------------------------------|
| Mtap2             | <b>1.52</b> | <b>0.00</b> | NM_013066    | microtubule-associated protein 2                                       |
| Mup5              | <b>2.95</b> | <b>0.00</b> | AB039828     | alpha-2u globulin, complete cds, clone:PGCL7.                          |
| Myh10             | <b>2.42</b> | <b>0.01</b> | NM_031520    | myosin, heavy polypeptide 10, non-muscle                               |
| Myog              | <b>1.70</b> | <b>0.02</b> | NM_017115    | myogenin                                                               |
| Nanos3_predicted  | <b>1.71</b> | <b>0.03</b> | XM_222459    | nanos homolog 3 (Drosophila) (predicted)                               |
| Nap111            | <b>1.95</b> | <b>0.00</b> | NM_053561    | nucleosome assembly protein 1-like 1                                   |
| Ndubf3_predicted  | <b>1.55</b> | <b>0.00</b> | XM_217400    | NADH dehydrogenase (ubiquinone) 1 beta subcomplex 3 (predicted)        |
| Neto2_predicted   | <b>1.60</b> | <b>0.00</b> | XM_226349    | neuropilin (NRP) and tolloid (TLL)-like 2 (predicted)                  |
| Nfic              | <b>1.91</b> | <b>0.05</b> | XM_345789    | nuclear factor I/C                                                     |
| Nhlh1_predicted   | <b>2.19</b> | <b>0.03</b> | XM_222898    | similar to helix-loop-helix protein                                    |
| Nip7              | <b>1.53</b> | <b>0.00</b> | NM_138847    | nuclear import 7 homolog (S. cerevisiae)                               |
| Nlgn1             | <b>2.04</b> | <b>0.00</b> | NM_053868    | neuroligin 1                                                           |
| Nox1_predicted    | <b>2.41</b> | <b>0.03</b> | XM_220221    | NADPH oxidase organizer 1 (predicted)                                  |
| Npas3_predicted   | <b>1.78</b> | <b>0.01</b> | XM_234124    | neuronal PAS domain protein 3 (predicted)                              |
| Npff              | <b>1.96</b> | <b>0.04</b> | NM_022586    | neuropeptide FF-amide peptide precursor                                |
| Nppb              | <b>1.76</b> | <b>0.02</b> | NM_031545    | natriuretic peptide precursor type B                                   |
| Nr2f2             | <b>3.21</b> | <b>0.02</b> | NM_080778    | nuclear receptor subfamily 2, group F, member 2                        |
| Nr4a1             | <b>2.07</b> | <b>0.00</b> | NM_024388    | nuclear receptor subfamily 4, group A, member 1                        |
| Nr4a2             | <b>1.57</b> | <b>0.00</b> | NM_019328    | nuclear receptor subfamily 4, group A, member 2                        |
| Nr4a3             | <b>2.46</b> | <b>0.00</b> | NM_017352    | nuclear receptor subfamily 4, group A, member 3, transcript variant 2, |
| Ntrk1             | <b>1.79</b> | <b>0.00</b> | NM_021589    | neurotrophic tyrosine kinase, receptor, type 1                         |
| Nup160_predicted  | <b>1.63</b> | <b>0.02</b> | XM_230286    | nucleoporin 160 (predicted)                                            |
| Olr1007_predicted | <b>2.94</b> | <b>0.00</b> | NM_001000076 | olfactory receptor 1007 (predicted)                                    |
| Olr1051_predicted | <b>1.82</b> | <b>0.00</b> | NM_001001364 | olfactory receptor 1051 (predicted)]                                   |
| Olr1055_predicted | <b>2.42</b> | <b>0.03</b> | NM_001000067 | olfactory receptor 1055 (predicted)                                    |
| Olr1082           | <b>2.62</b> | <b>0.04</b> | NM_173335    | olfactory receptor 1082                                                |
| Olr1088_predicted | <b>1.98</b> | <b>0.00</b> | XM_234873    | similar to olfactory receptor GA_x6K02T2QGN0-3289955-3289014           |
| Olr1091_predicted | <b>1.70</b> | <b>0.00</b> | NM_001000593 | olfactory receptor 1091 (predicted)                                    |
| Olr1122_predicted | <b>1.55</b> | <b>0.04</b> | NM_001000088 | olfactory receptor 1122 (predicted)                                    |

|                   |             |             |               |                                     |
|-------------------|-------------|-------------|---------------|-------------------------------------|
| ted               |             |             | 2             |                                     |
| Olr113_predicted  | <b>2.53</b> | <b>0.00</b> | NM_001000151  | olfactory receptor 113 (predicted)  |
| Olr1130_predicted | <b>3.20</b> | <b>0.00</b> | NM_001000428  | olfactory receptor 1130 (predicted) |
| Olr1132_predicted | <b>2.07</b> | <b>0.02</b> | NM_0010000986 | olfactory receptor 1132 (predicted) |
| Olr1144_predicted | <b>1.96</b> | <b>0.01</b> | NM_0010000876 | olfactory receptor 1144 (predicted) |
| Olr1156_predicted | <b>1.93</b> | <b>0.01</b> | NM_0010000873 | olfactory receptor 1156 (predicted) |
| Olr1163_predicted | <b>2.84</b> | <b>0.00</b> | NM_0010000869 | olfactory receptor 1163 (predicted) |
| Olr1172           | <b>1.85</b> | <b>0.00</b> | NM_0010000983 | olfactory receptor 1172             |
| Olr1194_predicted | <b>1.93</b> | <b>0.00</b> | NM_0010000820 | olfactory receptor 1194 (predicted) |
| Olr1220_predicted | <b>2.03</b> | <b>0.01</b> | NM_0010000814 | olfactory receptor 1220 (predicted) |
| Olr1236_predicted | <b>3.39</b> | <b>0.00</b> | NM_0010000812 | olfactory receptor 1236 (predicted) |
| Olr1251_predicted | <b>2.21</b> | <b>0.00</b> | NM_0010000453 | olfactory receptor 1251 (predicted) |
| Olr1265_predicted | <b>1.88</b> | <b>0.03</b> | NM_0010000457 | olfactory receptor 1265 (predicted) |
| Olr1292_predicted | <b>1.76</b> | <b>0.04</b> | NM_0010000960 | olfactory receptor 1292 (predicted) |
| Olr1306_predicted | <b>1.66</b> | <b>0.00</b> | NM_0010000465 | olfactory receptor 1306 (predicted) |
| Olr1309_predicted | <b>1.68</b> | <b>0.01</b> | NM_0010000466 | olfactory receptor 1309 (predicted) |
| Olr1346           | <b>1.50</b> | <b>0.04</b> | NM_0010000520 | olfactory receptor 1346             |
| Olr1352_predicted | <b>1.56</b> | <b>0.00</b> | NM_0010000953 | olfactory receptor 1352 (predicted) |
| Olr1353_predicted | <b>2.39</b> | <b>0.00</b> | NM_0010000750 | olfactory receptor 1353 (predicted) |
| Olr1362           | <b>2.32</b> | <b>0.04</b> | NM_0010006598 | olfactory receptor 1362             |
| Olr1382_predicted | <b>1.81</b> | <b>0.02</b> | NM_214831     | olfactory receptor 1382 (predicted) |
| Olr1388_predicted | <b>1.86</b> | <b>0.03</b> | NM_0010000788 | olfactory receptor 1388 (predicted) |
| Olr1405_predicted | <b>1.55</b> | <b>0.01</b> | NM_0010001012 | olfactory receptor 1405 (predicted) |
| Olr1409_predicted | <b>1.59</b> | <b>0.01</b> | NM_001000000  | olfactory receptor 1409 (predicted) |

|                   |             |             |              |                                     |
|-------------------|-------------|-------------|--------------|-------------------------------------|
| ted               |             |             | 4            |                                     |
| Olr1418_predicted | <b>2.02</b> | <b>0.03</b> | NM_001000008 | olfactory receptor 1418 (predicted) |
| Olr143_predicted  | <b>1.83</b> | <b>0.03</b> | NM_001000163 | olfactory receptor 143 (predicted)  |
| Olr1443_predicted | <b>1.57</b> | <b>0.03</b> | NM_001000018 | olfactory receptor 1443 (predicted) |
| Olr1455_predicted | <b>2.23</b> | <b>0.03</b> | NM_001000771 | olfactory receptor 1455 (predicted) |
| Olr1475_predicted | <b>2.05</b> | <b>0.00</b> | NM_001000027 | olfactory receptor 1475 (predicted) |
| Olr148_predicted  | <b>2.16</b> | <b>0.05</b> | NM_001000165 | olfactory receptor 148 (predicted)  |
| Olr1486_predicted | <b>2.29</b> | <b>0.01</b> | NM_001000720 | olfactory receptor 1486 (predicted) |
| Olr1498_predicted | <b>1.52</b> | <b>0.03</b> | NM_001000030 | olfactory receptor 1498 (predicted) |
| Olr1515_predicted | <b>1.71</b> | <b>0.00</b> | NM_001001098 | olfactory receptor 1515 (predicted) |
| Olr1521_predicted | <b>2.25</b> | <b>0.05</b> | NM_001000039 | olfactory receptor 1521 (predicted) |
| Olr1523           | <b>1.71</b> | <b>0.03</b> | NM_001000713 | olfactory receptor 1523             |
| Olr1543_predicted | <b>1.60</b> | <b>0.00</b> | NM_001001104 | olfactory receptor 1543 (predicted) |
| Olr1608_predicted | <b>2.25</b> | <b>0.00</b> | NM_001000093 | olfactory receptor 1608 (predicted) |
| Olr1617_predicted | <b>1.63</b> | <b>0.04</b> | NM_001000839 | olfactory receptor 1617 (predicted) |
| Olr1658_predicted | <b>1.52</b> | <b>0.04</b> | NM_001000105 | olfactory receptor 1658 (predicted) |
| Olr1671_predicted | <b>2.35</b> | <b>0.00</b> | NM_001000266 | olfactory receptor 1671 (predicted) |
| Olr1679_predicted | <b>1.84</b> | <b>0.04</b> | NM_001000892 | olfactory receptor 1679 (predicted) |
| Olr1682_predicted | <b>1.54</b> | <b>0.01</b> | NM_001000890 | olfactory receptor 1682 (predicted) |
| Olr1687           | <b>1.56</b> | <b>0.03</b> | NM_001000508 | olfactory receptor 1687             |
| Olr1701_predicted | <b>3.97</b> | <b>0.04</b> | NM_001001114 | olfactory receptor 1701 (predicted) |
| Olr1722_predicted | <b>1.99</b> | <b>0.03</b> | NM_001001117 | olfactory receptor 1722 (predicted) |
| Olr1729_predicted | <b>2.71</b> | <b>0.00</b> | XM_227932    | olfactory receptor 1729 (predicted) |
| Olr1748_predicted | <b>3.37</b> | <b>0.00</b> | NM_001001142 | olfactory receptor 1748 (predicted) |

|                   |             |             |              |                                     |
|-------------------|-------------|-------------|--------------|-------------------------------------|
| ted               |             |             | 8            |                                     |
| Olr1765_predicted | <b>2.97</b> | <b>0.01</b> | NM_001000489 | olfactory receptor 1765 (predicted) |
| Olr211_predicted  | <b>1.71</b> | <b>0.01</b> | NM_001000196 | olfactory receptor 211 (predicted)  |
| Olr223_predicted  | <b>2.37</b> | <b>0.01</b> | NM_001000202 | olfactory receptor 223 (predicted)  |
| Olr285_predicted  | <b>1.52</b> | <b>0.01</b> | NM_001000223 | olfactory receptor 285 (predicted)  |
| Olr324_predicted  | <b>2.46</b> | <b>0.01</b> | NM_001000246 | olfactory receptor 324 (predicted)  |
| Olr337            | <b>1.92</b> | <b>0.01</b> | NM_001000507 | olfactory receptor 337              |
| Olr363_predicted  | <b>2.03</b> | <b>0.00</b> | NM_001000754 | olfactory receptor 363 (predicted)  |
| Olr371_predicted  | <b>1.89</b> | <b>0.00</b> | NM_001000258 | olfactory receptor 371 (predicted)  |
| Olr374_predicted  | <b>2.64</b> | <b>0.02</b> | NM_001001289 | olfactory receptor 374 (predicted)  |
| Olr375_predicted  | <b>1.72</b> | <b>0.05</b> | NM_001000259 | olfactory receptor 375 (predicted)  |
| Olr390_predicted  | <b>2.43</b> | <b>0.00</b> | NM_001000558 | olfactory receptor 390 (predicted)  |
| Olr396_predicted  | <b>2.31</b> | <b>0.00</b> | NM_001000831 | olfactory receptor 396 (predicted)  |
| Olr416_predicted  | <b>1.55</b> | <b>0.01</b> | NM_001000387 | olfactory receptor 416 (predicted)  |
| Olr419_predicted  | <b>2.27</b> | <b>0.00</b> | NM_001000968 | olfactory receptor 419 (predicted)  |
| Olr428_predicted  | <b>1.53</b> | <b>0.00</b> | NM_001000394 | olfactory receptor 428 (predicted)  |
| Olr443_predicted  | <b>1.84</b> | <b>0.05</b> | NM_001000285 | olfactory receptor 443 (predicted)  |
| Olr446_predicted  | <b>1.70</b> | <b>0.00</b> | NM_001001050 | olfactory receptor 446 (predicted)  |
| Olr450_predicted  | <b>2.05</b> | <b>0.00</b> | NM_001000288 | olfactory receptor 450 (predicted)  |
| Olr46_predicted   | <b>1.83</b> | <b>0.02</b> | NM_001001001 | olfactory receptor 46 (predicted)   |
| Olr463_predicted  | <b>1.58</b> | <b>0.00</b> | NM_001000934 | olfactory receptor 463 (predicted)  |
| Olr473_predicted  | <b>2.75</b> | <b>0.00</b> | NM_001000302 | olfactory receptor 473 (predicted)  |
| Olr484_predicted  | <b>1.91</b> | <b>0.03</b> | NM_001000306 | olfactory receptor 484 (predicted)  |
| Olr510_predicted  | <b>2.04</b> | <b>0.04</b> | NM_00100031  | olfactory receptor 510 (predicted)  |

|                  |             |             |              |                                    |
|------------------|-------------|-------------|--------------|------------------------------------|
| d                |             |             | 2            |                                    |
| Olr514_predicted | <b>2.83</b> | <b>0.00</b> | NM_001000314 | olfactory receptor 514 (predicted) |
| Olr531_predicted | <b>1.51</b> | <b>0.02</b> | NM_001001051 | olfactory receptor 531 (predicted) |
| Olr535_predicted | <b>2.28</b> | <b>0.03</b> | NM_001000672 | olfactory receptor 535 (predicted) |
| Olr541_predicted | <b>2.19</b> | <b>0.02</b> | NM_001000565 | olfactory receptor 541 (predicted) |
| Olr550_predicted | <b>1.90</b> | <b>0.00</b> | NM_001000322 | olfactory receptor 550 (predicted) |
| Olr554_predicted | <b>1.62</b> | <b>0.02</b> | NM_001000323 | olfactory receptor 554 (predicted) |
| Olr56_predicted  | <b>3.20</b> | <b>0.00</b> | NM_001000130 | olfactory receptor 56 (predicted)  |
| Olr560_predicted | <b>2.43</b> | <b>0.03</b> | NM_001000325 | olfactory receptor 560 (predicted) |
| Olr597_predicted | <b>3.15</b> | <b>0.00</b> | NM_001000331 | olfactory receptor 597 (predicted) |
| Olr62_predicted  | <b>1.79</b> | <b>0.00</b> | NM_001000129 | olfactory receptor 62 (predicted)  |
| Olr661_predicted | <b>2.11</b> | <b>0.02</b> | NM_001000925 | olfactory receptor 661 (predicted) |
| Olr662_predicted | <b>1.83</b> | <b>0.02</b> | NM_001001060 | olfactory receptor 662 (predicted) |
| Olr690_predicted | <b>1.68</b> | <b>0.00</b> | NM_001000569 | olfactory receptor 690 (predicted) |
| Olr694_predicted | <b>1.70</b> | <b>0.00</b> | NM_001000357 | olfactory receptor 694 (predicted) |
| Olr697_predicted | <b>1.99</b> | <b>0.01</b> | NM_001001064 | olfactory receptor 697 (predicted) |
| Olr701_predicted | <b>2.42</b> | <b>0.00</b> | NM_001000627 | olfactory receptor 701 (predicted) |
| Olr704_predicted | <b>1.56</b> | <b>0.01</b> | NM_001000626 | olfactory receptor 704 (predicted) |
| Olr714_predicted | <b>1.75</b> | <b>0.00</b> | NM_001000923 | olfactory receptor 714 (predicted) |
| Olr718_predicted | <b>1.77</b> | <b>0.01</b> | NM_001000361 | olfactory receptor 718 (predicted) |
| Olr757_predicted | <b>1.71</b> | <b>0.01</b> | NM_001000613 | olfactory receptor 757 (predicted) |
| Olr85_predicted  | <b>2.42</b> | <b>0.00</b> | NM_001000138 | olfactory receptor 85 (predicted)  |
| Olr851_predicted | <b>2.16</b> | <b>0.01</b> | NM_001000400 | olfactory receptor 851 (predicted) |
| Olr852_predicted | <b>1.57</b> | <b>0.03</b> | NM_00100039  | olfactory receptor 852 (predicted) |



|                   |             |             |              |                                                                                                             |
|-------------------|-------------|-------------|--------------|-------------------------------------------------------------------------------------------------------------|
| d                 |             |             | 9            |                                                                                                             |
| Olr862_predicted  | <b>1.60</b> | <b>0.00</b> | NM_001001071 | olfactory receptor 862 (predicted)                                                                          |
| Olr869_predicted  | <b>1.82</b> | <b>0.01</b> | NM_001000413 | olfactory receptor 869 (predicted)                                                                          |
| Olr878_predicted  | <b>1.64</b> | <b>0.02</b> | NM_001000497 | olfactory receptor 878 (predicted)                                                                          |
| Olr906_predicted  | <b>2.53</b> | <b>0.01</b> | NM_001000706 | olfactory receptor 906 (predicted)                                                                          |
| Olr91_predicted   | <b>1.68</b> | <b>0.01</b> | NM_001000139 | olfactory receptor 91 (predicted)                                                                           |
| Olr932_predicted  | <b>2.00</b> | <b>0.00</b> | NM_001001386 | olfactory receptor 932 (predicted)                                                                          |
| Olr951_predicted  | <b>1.55</b> | <b>0.00</b> | NM_001000073 | olfactory receptor 951 (predicted)                                                                          |
| Olr982_predicted  | <b>2.03</b> | <b>0.02</b> | NM_001000702 | olfactory receptor 982 (predicted)                                                                          |
| Orc3l             | <b>1.99</b> | <b>0.04</b> | NM_001025282 | origin recognition complex, subunit 3-like (S. cerevisiae)                                                  |
| Osm_mapped        | <b>2.38</b> | <b>0.03</b> | NM_001006961 | oncostatin M (mapped)                                                                                       |
| P2rx1             | <b>2.81</b> | <b>0.00</b> | NM_012997    | purinergic receptor P2X, ligand-gated ion channel, 1                                                        |
| P2ry14            | <b>2.17</b> | <b>0.01</b> | NM_133577    | purinergic receptor P2Y, G-protein coupled, 14                                                              |
| P4ha2_predicted   | <b>1.50</b> | <b>0.00</b> | XM_340798    | procollagen-proline, 2-oxoglutarate 4-dioxygenase (proline 4-hydroxylase), alpha II polypeptide (predicted) |
| Padi2             | <b>1.84</b> | <b>0.00</b> | NM_017226    | peptidyl arginine deiminase, type II                                                                        |
| Pard6b_predicted  | <b>2.28</b> | <b>0.04</b> | XM_342589    | par-6 (partitioning defective 6) homolog beta (C. elegans) (predicted)                                      |
| Parp12_predicted  | <b>3.53</b> | <b>0.02</b> | XM_342663    | similar to 9930021O16 protein                                                                               |
| Pdha1             | <b>1.61</b> | <b>0.02</b> | NM_001004072 | pyruvate dehydrogenase E1 alpha 1                                                                           |
| Pdik11_predicted  | <b>2.17</b> | <b>0.03</b> | XM_233567    | PDLIM1 interacting kinase 1 like (predicted)                                                                |
| Pdx1              | <b>1.80</b> | <b>0.01</b> | NM_022852    | pancreatic and duodenal homeobox gene 1                                                                     |
| Pecr              | <b>1.56</b> | <b>0.01</b> | NM_133299    | peroxisomal trans-2-enoyl-CoA reductase                                                                     |
| Pet112l_predicted | <b>1.74</b> | <b>0.01</b> | XM_342270    | similar to RIKEN cDNA 9430026F02                                                                            |
| Pgam1             | <b>9.39</b> | <b>0.00</b> | NM_053290    | phosphoglycerate mutase 1                                                                                   |
| Pggt1b            | <b>1.57</b> | <b>0.04</b> | NM_031082    | protein geranylgeranyltransferase type I, beta subunit                                                      |
| Phax              | <b>1.93</b> | <b>0.00</b> | NM_173133    | phosphorylated adaptor for RNA export                                                                       |
| Pigl              | <b>1.53</b> | <b>0.01</b> | NM_138901    | phosphatidylinositol glycan, class L                                                                        |
| Pim3              | <b>1.88</b> | <b>0.00</b> | NM_022602    | serine/threonine-protein kinase pim-3                                                                       |

|                   |             |             |              |                                                                                            |
|-------------------|-------------|-------------|--------------|--------------------------------------------------------------------------------------------|
| Plcl1             | <b>1.69</b> | <b>0.01</b> | NM_053456    | phospholipase C-like 1                                                                     |
| Plekhf1           | <b>1.55</b> | <b>0.00</b> | NM_001013148 | pleckstrin homology domain containing, family F (with FYVE domain) member 1                |
| Plp2_mapped       | <b>1.80</b> | <b>0.00</b> | NM_207601    | proteolipid protein 2 (mapped)                                                             |
| Plscr1            | <b>1.58</b> | <b>0.00</b> | NM_057194    | phospholipid scramblase 1                                                                  |
| Pmfbp1            | <b>2.17</b> | <b>0.00</b> | NM_134393    | polyamine modulated factor 1 binding protein 1                                             |
| Pmm1              | <b>1.67</b> | <b>0.00</b> | NM_001008323 | phosphomannomutase 1                                                                       |
| Polb              | <b>1.69</b> | <b>0.01</b> | NM_017141    | polymerase (DNA directed), beta                                                            |
| Pop1_predicted    | <b>1.53</b> | <b>0.00</b> | XM_235391    | processing of precursor 1, ribonuclease P/MRP family, ( <i>S. cerevisiae</i> ) (predicted) |
| Ppargc1a          | <b>1.60</b> | <b>0.00</b> | NM_031347    | peroxisome proliferative activated receptor, gamma, coactivator 1 alpha                    |
| Ppig              | <b>1.62</b> | <b>0.03</b> | NM_031793    | peptidylprolyl isomerase G                                                                 |
| Ppm1h             | <b>1.71</b> | <b>0.05</b> | NM_001013173 | protein phosphatase 1H (PP2C domain containing)                                            |
| Ppp3ca            | <b>2.42</b> | <b>0.01</b> | NM_017041    | protein phosphatase 3, catalytic subunit, alpha isoform                                    |
| Prap1             | <b>1.60</b> | <b>0.04</b> | NM_031669    | proline-rich acidic protein 1                                                              |
| Prfl              | <b>2.65</b> | <b>0.02</b> | NM_017330    | perforin 1 (pore forming protein)                                                          |
| Prg1              | <b>1.77</b> | <b>0.00</b> | NM_001001508 | plasticity related gene 1                                                                  |
| Prg3_predicted    | <b>2.09</b> | <b>0.00</b> | XM_230054    | proteoglycan 3 (predicted)                                                                 |
| Prlhr             | <b>2.54</b> | <b>0.00</b> | NM_139193    | prolactin releasing hormone receptor                                                       |
| Prlpc2            | <b>1.90</b> | <b>0.05</b> | NM_134385    | prolactin-like protein C 2                                                                 |
| Prnd              | <b>1.91</b> | <b>0.03</b> | XM_230542    | prion protein dublet                                                                       |
| Prr3              | <b>1.63</b> | <b>0.00</b> | NM_212544    | proline-rich polypeptide 3                                                                 |
| Prss1             | <b>2.68</b> | <b>0.04</b> | NM_012635    | pancreatic trypsin 1                                                                       |
| Prss12            | <b>2.49</b> | <b>0.03</b> | NM_053504    | peptidase, serine, 12 (neurotrypsin, motopsin)                                             |
| Psmb10            | <b>1.60</b> | <b>0.00</b> | NM_001025637 | proteasome (prosome, macropain) subunit, beta type 10                                      |
| Ptgs2             | <b>2.51</b> | <b>0.01</b> | NM_017232    | prostaglandin-endoperoxide synthase 2                                                      |
| Ptn               | <b>1.73</b> | <b>0.00</b> | NM_017066    | pleiotrophin                                                                               |
| Ptpmt1            | <b>1.73</b> | <b>0.00</b> | XM_342460    | protein tyrosine phosphatase, mitochondrial 1                                              |
| Pvrl3_predicted   | <b>1.60</b> | <b>0.01</b> | XM_213626    | poliovirus receptor-related 3 (predicted)                                                  |
| Pygl              | <b>2.45</b> | <b>0.03</b> | NM_022268    | liver glycogen phosphorylase                                                               |
| Rab2              | <b>1.54</b> | <b>0.00</b> | NM_031718    | RAB2, member RAS oncogene family                                                           |
| Rabggb            | <b>1.67</b> | <b>0.01</b> | NM_138708    | RAB geranylgeranyl transferase, b subunit                                                  |
| Racgap1_predicted | <b>1.73</b> | <b>0.01</b> | XM_235650    | Rac GTPase-activating protein 1 (predicted)                                                |
| Rapgef1           | <b>1.66</b> | <b>0.00</b> | XM_216018    | Rap guanine nucleotide exchange factor (GEF) 1                                             |
| Rasd1             | <b>1.66</b> | <b>0.00</b> | XM_340809    | RAS, dexamethasone-induced 1                                                               |
| Rbp3              | <b>2.36</b> | <b>0.00</b> | XM_341400    | retinol binding protein 3, interstitial                                                    |

|                      |             |             |              |                                                                                        |
|----------------------|-------------|-------------|--------------|----------------------------------------------------------------------------------------|
| Rg9mtd3              | <b>1.52</b> | <b>0.00</b> | NM_001013090 | RNA (guanine-9-) methyltransferase domain containing 3                                 |
| RGD1305160           | <b>1.59</b> | <b>0.02</b> | NM_001025124 | similar to N-terminal asparagine amidohydrolase                                        |
| RGD1305254_predicted | <b>2.43</b> | <b>0.03</b> | XM_218855    | similar to transmembrane protein 2 (predicted)                                         |
| RGD1305326_predicted | <b>1.66</b> | <b>0.00</b> | XM_215707    | similar to hypothetical protein FLJ20647 (predicted)                                   |
| RGD1307235_predicted | <b>1.55</b> | <b>0.00</b> | XM_219401    | similar to RIKEN cDNA 2310035C23                                                       |
| RGD1307418_predicted | <b>1.93</b> | <b>0.04</b> | XM_226401    | similar to cDNA sequence BC026374 (predicted) (RGD1307418_predicted), mRNA [XM_226401] |
| RGD1307506_predicted | <b>1.53</b> | <b>0.01</b> | XM_215486    | similar to RIKEN cDNA 2310016C16 (predicted)                                           |
| RGD1307658_predicted | <b>1.80</b> | <b>0.01</b> | XM_232819    | similar to 3000004N20Rik protein (predicted)                                           |
| RGD1307904_predicted | <b>1.58</b> | <b>0.00</b> | XM_341920    | similar to RIKEN cDNA 3230401I01 (predicted)                                           |
| RGD1308877_predicted | <b>1.87</b> | <b>0.00</b> | XM_230548    | similar to CGI-09 protein (predicted)                                                  |
| RGD1309007_predicted | <b>3.43</b> | <b>0.01</b> | XM_215595    | similar to RIKEN cDNA 2610034E18 gene (predicted)                                      |
| RGD1309578           | <b>1.79</b> | <b>0.00</b> | NM_001014162 | similar to Aa2-174                                                                     |
| RGD1310712_predicted | <b>1.86</b> | <b>0.00</b> | XM_001064849 | similar to EMSY protein (predicted)                                                    |
| RGD1311100_predicted | <b>1.54</b> | <b>0.00</b> | XM_221376    | similar to RIKEN cDNA D630035O19 (predicted)                                           |
| RGD1311310_predicted | <b>1.56</b> | <b>0.00</b> | XM_235517    | similar to hypothetical protein supported by AL449243 (predicted)                      |
| RGD1311406_predicted | <b>2.74</b> | <b>0.00</b> | XM_346015    | similar to RIKEN cDNA B430306N03 gene                                                  |
| RGD1311881           | <b>1.77</b> | <b>0.00</b> | NM_001035251 | similar to hypothetical protein FLJ90709                                               |
| RGD1359349           | <b>2.58</b> | <b>0.01</b> | NM_001007738 | similar to hypothetical protein MGC34760                                               |
| RGD1359460           | <b>1.55</b> | <b>0.00</b> | NM_001006959 | MMR_HSR1 domain containing protein                                                     |
| Rgs2                 | <b>1.67</b> | <b>0.00</b> | NM_053453    | regulator of G-protein signaling 2                                                     |
| Rock1                | <b>1.70</b> | <b>0.04</b> | NM_031098    | Rho-associated coiled-coil forming kinase 1                                            |
| Rplp2                | <b>1.62</b> | <b>0.00</b> | NM_001030021 | ribosomal protein, large P2                                                            |
| Rps14                | <b>1.61</b> | <b>0.00</b> | NM_022672    | ribosomal protein S14                                                                  |
| Rps27a               | <b>2.16</b> | <b>0.00</b> | NM_031113    | ribosomal protein S27a                                                                 |
| Rps6kc1              | <b>1.65</b> | <b>0.00</b> | XM_213966    | ribosomal protein S6 kinase, polypeptide 1                                             |

|                    |             |             |              |                                                                                                    |
|--------------------|-------------|-------------|--------------|----------------------------------------------------------------------------------------------------|
| Rrh_predicted      | <b>1.53</b> | <b>0.00</b> | XM_227718    | retinal pigment epithelium derived rhodopsin homolog (predicted)                                   |
| Rsrc1              | <b>1.52</b> | <b>0.00</b> | NM_001014172 | arginine/serine-rich coiled-coil 1                                                                 |
| RT1-DOb            | <b>2.48</b> | <b>0.02</b> | NM_001008846 | RT1 class II, locus DOb                                                                            |
| S100a3             | <b>1.81</b> | <b>0.01</b> | NM_053681    | S100 calcium binding protein A3                                                                    |
| S100a6             | <b>1.57</b> | <b>0.03</b> | NM_053485    | S100 calcium binding protein A6 (calyculin)                                                        |
| Scara5_predicted   | <b>1.94</b> | <b>0.04</b> | XM_224299    | scavenger receptor class A, member 5 (putative) (predicted)                                        |
| Scn2a1             | <b>1.84</b> | <b>0.01</b> | NM_012647    | sodium channel, voltage-gated, type 2, alpha 1 polypeptide                                         |
| Scn3a              | <b>1.74</b> | <b>0.00</b> | NM_013119    | sodium channel, voltage-gated, type III, alpha polypeptide                                         |
| Sct                | <b>1.75</b> | <b>0.04</b> | NM_022670    | secretin                                                                                           |
| Sdc1               | <b>1.85</b> | <b>0.00</b> | NM_013026    | syndecan 1                                                                                         |
| Sdcbp              | <b>1.55</b> | <b>0.00</b> | NM_031986    | syndecan binding protein                                                                           |
| Sdpr               | <b>1.79</b> | <b>0.04</b> | NM_001007712 | serum deprivation response protein                                                                 |
| Sec22l1            | <b>1.78</b> | <b>0.00</b> | NM_001025686 | SEC22 vesicle trafficking protein-like 1 ( <i>S. cerevisiae</i> )                                  |
| Serpina12          | <b>2.88</b> | <b>0.00</b> | NM_138825    | serine (or cysteine) peptidase inhibitor, clade A (alpha-1 antiproteinase, antitrypsin), member 12 |
| Serpina3n          | <b>2.61</b> | <b>0.00</b> | NM_031531    | serine (or cysteine) peptidase inhibitor, clade A, member 3N                                       |
| Sfrs2              | <b>2.00</b> | <b>0.02</b> | NM_001009720 | similar to splicing factor, arginine/serine-rich 2                                                 |
| Sgk                | <b>1.50</b> | <b>0.03</b> | NM_019232    | serum/glucocorticoid regulated kinase                                                              |
| Shoc2              | <b>2.01</b> | <b>0.00</b> | NM_001013155 | soc-2 (suppressor of clear) homolog ( <i>C. elegans</i> )                                          |
| Sin3a_predicted    | <b>1.83</b> | <b>0.00</b> | XM_343395    | transcriptional regulator, SIN3A (yeast) (predicted)                                               |
| Sipa1l1            | <b>1.63</b> | <b>0.00</b> | NM_139330    | signal-induced proliferation-associated 1 like 1                                                   |
| Slc16a10           | <b>1.83</b> | <b>0.00</b> | NM_138831    | solute carrier family 16 (monocarboxylic acid transporters), member 10                             |
| Slc21a1            | <b>1.88</b> | <b>0.05</b> | NM_017111    | solute carrier family 21, member 1                                                                 |
| Slc22a14_predicted | <b>1.51</b> | <b>0.01</b> | XM_236684    | solute carrier family 22 (organic cation transporter), member 14 (predicted)                       |
| Slc24a5_predicted  | <b>2.78</b> | <b>0.00</b> | XM_230584    | solute carrier family 24, member 5 (predicted)                                                     |
| Slc25a27           | <b>1.86</b> | <b>0.04</b> | NM_053500    | solute carrier family 25, member 27                                                                |
| Slc27a5            | <b>1.52</b> | <b>0.01</b> | NM_024143    | solute carrier family 27 (fatty acid transporter), member 5                                        |
| Slc28a2            | <b>2.52</b> | <b>0.04</b> | U67084       | sodium/nucleoside cotransporter (rCNT2) mRNA, partial cds                                          |

|                   |             |             |              |                                                                                                               |
|-------------------|-------------|-------------|--------------|---------------------------------------------------------------------------------------------------------------|
| Slc2a2            | <b>1.88</b> | <b>0.00</b> | NM_012879    | solute carrier family 2 (facilitated glucose transporter), member 2                                           |
| Slc38a4           | <b>1.82</b> | <b>0.01</b> | NM_130748    | solute carrier family 38, member 4                                                                            |
| Slc43a3_predicted | <b>1.69</b> | <b>0.03</b> | XM_230052    | solute carrier family 43, member 3 (predicted)                                                                |
| Slc5a1            | <b>1.75</b> | <b>0.03</b> | NM_013033    | solute carrier family 5 (sodium/glucose cotransporter), member 1                                              |
| Slc5a4b           | <b>2.91</b> | <b>0.01</b> | XM_228086    | similar to SGLT3-b                                                                                            |
| Slc5a7            | <b>1.68</b> | <b>0.00</b> | NM_053521    | solute carrier family 5 (choline transporter), member 7                                                       |
| Smarca5_predicted | <b>1.79</b> | <b>0.00</b> | XM_226380    | SWI/SNF related, matrix associated, actin dependent regulator of chromatin, subfamily a, member 5 (predicted) |
| Smurf2_predicted  | <b>1.78</b> | <b>0.00</b> | XM_221048    | SMAD specific E3 ubiquitin protein ligase 2 (predicted)                                                       |
| Snai1             | <b>2.42</b> | <b>0.00</b> | NM_053805    | snail homolog 1 (Drosophila)                                                                                  |
| Sncg              | <b>1.53</b> | <b>0.05</b> | NM_031688    | synuclein, gamma                                                                                              |
| Snf1lk            | <b>2.16</b> | <b>0.00</b> | NM_021693    | SNF1-like kinase                                                                                              |
| Sox11             | <b>1.87</b> | <b>0.00</b> | NM_053349    | SRY-box containing gene 11                                                                                    |
| Sphk1             | <b>1.83</b> | <b>0.01</b> | NM_133386    | sphingosine kinase 1                                                                                          |
| Spry4_predicted   | <b>1.85</b> | <b>0.02</b> | XM_225969    | sprouty homolog 4 (Drosophila) (predicted)                                                                    |
| Ssh3              | <b>1.62</b> | <b>0.04</b> | NM_001012217 | slingshot homolog 3 (Drosophila)                                                                              |
| Stab2             | <b>2.08</b> | <b>0.03</b> | AY007370     | hyaluronan receptor for endocytosis HARE precursor                                                            |
| Sugt1             | <b>1.61</b> | <b>0.00</b> | XM_214242    | SGT1, suppressor of G2 allele of SKP1 (S. cerevisiae)                                                         |
| Sumo1             | <b>1.52</b> | <b>0.00</b> | NM_001009672 | SMT3 suppressor of mif two 3 homolog 1 (yeast)                                                                |
| Taar7d            | <b>2.07</b> | <b>0.01</b> | NM_175591    | trace-amine-associated receptor 7d                                                                            |
| Taar7g            | <b>1.68</b> | <b>0.04</b> | NM_175588    | trace-amine-associated receptor 7g                                                                            |
| Tacr1             | <b>1.77</b> | <b>0.05</b> | NM_012667    | tachykinin receptor 1                                                                                         |
| Tagln             | <b>1.78</b> | <b>0.03</b> | AI104443     | cDNA clone RHECD48 3' end                                                                                     |
| Tap2              | <b>1.89</b> | <b>0.00</b> | NM_032056    | transporter 2, ATP-binding cassette, sub-family B (MDR/TAP)                                                   |
| Tas2r7            | <b>2.04</b> | <b>0.04</b> | NM_023997    | taste receptor, type 2, member 7                                                                              |
| Tead3             | <b>1.50</b> | <b>0.01</b> | XM_215356    | TEA domain family member 3                                                                                    |
| Tec               | <b>1.65</b> | <b>0.00</b> | XM_341208    | tec protein tyrosine kinase                                                                                   |
| Tff3              | <b>1.88</b> | <b>0.03</b> | NM_013042    | trefoil factor 3                                                                                              |
| Thbd              | <b>1.99</b> | <b>0.02</b> | NM_031771    | thrombomodulin                                                                                                |
| Timp1             | <b>1.93</b> | <b>0.02</b> | NM_053819    | tissue inhibitor of metalloproteinase 1                                                                       |
| Tle3              | <b>1.67</b> | <b>0.00</b> | NM_053400    | transducin-like enhancer of split 3, E(spl) homolog (Drosophila)                                              |
| Tm7sf3            | <b>1.52</b> | <b>0.00</b> | NM_00101197  | transmembrane 7 superfamily member 3                                                                          |

|                  |             |             |              |                                                                                               |
|------------------|-------------|-------------|--------------|-----------------------------------------------------------------------------------------------|
|                  |             |             | 0            |                                                                                               |
| Tm9sf2           | <b>1.95</b> | <b>0.00</b> | NM_001005554 | transmembrane 9 superfamily member 2                                                          |
| Tmc1_predicted   | <b>2.66</b> | <b>0.02</b> | XM_342033    | transmembrane channel-like 1 (predicted)                                                      |
| Tmsb10           | <b>2.44</b> | <b>0.04</b> | NM_021261    | thymosin, beta 10                                                                             |
| Tnfrsf1b         | <b>2.40</b> | <b>0.00</b> | NM_130426    | tumor necrosis factor receptor superfamily, member 1b                                         |
| Trim34_predicted | <b>1.80</b> | <b>0.02</b> | XM_219045    | tripartite motif protein 34 (predicted)                                                       |
| Trim39           | <b>1.53</b> | <b>0.03</b> | NM_213562    | tripartite motif protein 39                                                                   |
| Ttl3_predicted   | <b>1.56</b> | <b>0.00</b> | XM_342736    | tubulin tyrosine ligase-like family, member 3 (predicted)                                     |
| Ttn              | <b>2.57</b> | <b>0.00</b> | U89530       | titin protein homolog                                                                         |
| Tyr_mapped       | <b>2.09</b> | <b>0.00</b> | XM_238901    | tyrosinase (albino coat color) (mapped)                                                       |
| U14522           | <b>2.65</b> | <b>0.01</b> | U14522       | clone NOS1 CA satellite                                                                       |
| Ubb              | <b>1.84</b> | <b>0.04</b> | NM_138895    | polyubiquitin                                                                                 |
| Ube2d3           | <b>1.56</b> | <b>0.00</b> | NM_031237    | ubiquitin-conjugating enzyme E2D 3 (UBC4/5 homolog, yeast)                                    |
| Usp36_predicted  | <b>2.11</b> | <b>0.00</b> | XM_221143    | ubiquitin specific protease 36 (predicted)                                                    |
| Usp42_predicted  | <b>1.56</b> | <b>0.01</b> | XM_237865    | ubiquitin specific protease 42 (predicted)                                                    |
| Vcam1            | <b>1.52</b> | <b>0.00</b> | NM_012889    | vascular cell adhesion molecule 1                                                             |
| Vcsa1            | <b>2.16</b> | <b>0.00</b> | NM_012684    | variable coding sequence A1                                                                   |
| Verge            | <b>2.63</b> | <b>0.01</b> | NM_001003403 | vascular early response gene protein                                                          |
| Vpreb1_mapped    | <b>2.35</b> | <b>0.03</b> | XM_221258    | pre-B lymphocyte gene 1 (mapped)                                                              |
| Wasf2            | <b>1.62</b> | <b>0.00</b> | NM_001013167 | WAS protein family, member 2                                                                  |
| Wdfy2_predicted  | <b>1.79</b> | <b>0.01</b> | XM_224296    | similar to WD repeat- and FYVE domain-containing protein 2; WD40 and FYVE domain containing 2 |
| Wfdc3_predicted  | <b>1.99</b> | <b>0.00</b> | XM_215938    | WAP four-disulfide core domain 3 (predicted)                                                  |
| X76129           | <b>1.68</b> | <b>0.03</b> | X76129       | uPAR-3 gene                                                                                   |
| X80508           | <b>1.65</b> | <b>0.00</b> | X80508       | YAP65                                                                                         |
| XM_214528        | <b>1.50</b> | <b>0.00</b> | XM_214528    | similar to dim1                                                                               |
| XM_215027        | <b>2.04</b> | <b>0.02</b> | XM_215027    | similar to tripartite motif protein 6                                                         |
| XM_238205        | <b>1.89</b> | <b>0.02</b> | XM_238205    | similar to paladin                                                                            |
| XM_343003        | <b>1.60</b> | <b>0.00</b> | XM_343003    | similar to 9430065L19Rik protein                                                              |
| XM_343338        | <b>1.59</b> | <b>0.00</b> | XM_343338    | similar to nucleic acid binding protein                                                       |
| XM_344567        | <b>2.39</b> | <b>0.02</b> | XM_344567    | similar to heterogeneous nuclear ribonucleoprotein A0; hnRNA binding protein                  |
| XM_345338        | <b>1.67</b> | <b>0.01</b> | XM_345338    | similar to RIKEN cDNA 1200002K10 gene                                                         |

|                   |             |             |              |                                                                                     |
|-------------------|-------------|-------------|--------------|-------------------------------------------------------------------------------------|
| Yipf4             | <b>1.52</b> | <b>0.00</b> | NM_001009712 | Yip1 domain family, member 4                                                        |
| Zcchc10           | <b>1.63</b> | <b>0.00</b> | XM_346887    | zinc finger, CCHC domain containing 10, transcript variant 2                        |
| Zcchc11_predicted | <b>1.52</b> | <b>0.00</b> | XM_233345    | zinc finger, CCHC domain containing 11 (predicted)                                  |
| Zcchc9            | <b>1.66</b> | <b>0.00</b> | NM_001013156 | zinc finger, CCHC domain containing 9                                               |
| Zfp131            | <b>1.58</b> | <b>0.00</b> | XM_227104    | zinc finger protein 131                                                             |
| Zfp206_predicted  | <b>1.52</b> | <b>0.00</b> | XM_220198    | zinc finger protein 206 (predicted)                                                 |
| Zfp3611           | <b>1.64</b> | <b>0.00</b> | NM_017172    | zinc finger protein 36, C3H type-like 1                                             |
| AA799778          | <b>0.53</b> | <b>0.00</b> | AA799778     | cDNA clone RHEAF23 3'                                                               |
| Aaas_predicted    | <b>0.53</b> | <b>0.00</b> | XM_217063    | achalasia, adrenocortical insufficiency, alacrimia (Allgrove, triple-A) (predicted) |
| Abca8a_predicted  | <b>0.54</b> | <b>0.02</b> | XM_221100    | ATP-binding cassette, sub-family A (ABC1), member 8a (predicted)                    |
| Accn1             | <b>0.57</b> | <b>0.00</b> | NM_012892    | amiloride-sensitive cation channel 1, neuronal (degenerin), transcript variant 1    |
| Acss2_predicted   | <b>0.64</b> | <b>0.00</b> | XM_230773    | acyl-CoA synthetase short-chain family member 2 (predicted)                         |
| Adck4             | <b>0.61</b> | <b>0.00</b> | NM_001012065 | aarF domain containing kinase 4                                                     |
| Adck5             | <b>0.63</b> | <b>0.00</b> | XM_343273    | aarF domain containing kinase 5                                                     |
| Adcy1_predicted   | <b>0.60</b> | <b>0.01</b> | XM_223616    | adenylate cyclase 1 (predicted)                                                     |
| Adcy9_predicted   | <b>0.55</b> | <b>0.00</b> | XM_220178    | adenylate cyclase 9 (predicted)                                                     |
| Adrb3             | <b>0.62</b> | <b>0.01</b> | NM_013108    | adrenergic receptor, beta 3                                                         |
| Aff1_predicted    | <b>0.34</b> | <b>0.04</b> | XM_223161    | AF4/FMR2 family, member 1 (predicted)                                               |
| AI044410          | <b>0.63</b> | <b>0.01</b> | AI044410     | cDNA clone UI-R-C0-is-g-03-0-UI 3'                                                  |
| Akt2              | <b>0.47</b> | <b>0.00</b> | NM_017093    | thymoma viral proto-oncogene 2                                                      |
| Alg2              | <b>0.63</b> | <b>0.04</b> | XM_232987    | asparagine-linked glycosylation 2 homolog (yeast, alpha-1,3-mannosyltransferase)    |
| Amfr_predicted    | <b>0.61</b> | <b>0.01</b> | XM_341644    | autocrine motility factor receptor (predicted)                                      |
| Anapc1_predicted  | <b>0.52</b> | <b>0.01</b> | XM_230589    | anaphase promoting complex subunit 1 (predicted)                                    |
| Anapc7_predicted  | <b>0.65</b> | <b>0.00</b> | XM_222171    | anaphase promoting complex subunit 7 (predicted)                                    |
| Ank               | <b>0.39</b> | <b>0.00</b> | NM_053714    | progressive ankylosis homolog (mouse)                                               |
| Apbb3             | <b>0.59</b> | <b>0.00</b> | NM_053957    | amyloid beta (A4) precursor protein-binding, family B, member 3                     |
| Arcn1             | <b>0.63</b> | <b>0.00</b> | NM_001007662 | archain 1                                                                           |
| Arfip2            | <b>0.66</b> | <b>0.00</b> | NM_00100422  | ADP-ribosylation factor interacting protein 2                                       |

|                    |             |             |              |                                                                                                                       |
|--------------------|-------------|-------------|--------------|-----------------------------------------------------------------------------------------------------------------------|
|                    |             |             | 2            |                                                                                                                       |
| Arhgap21_predicted | <b>0.65</b> | <b>0.00</b> | XM_225628    | Rho GTPase activating protein 21 (predicted)                                                                          |
| Arhgef11           | <b>0.54</b> | <b>0.00</b> | NM_023982    | Rho guanine nucleotide exchange factor (GEF) 11                                                                       |
| Arpc4_predicted    | <b>0.58</b> | <b>0.00</b> | XM_238365    | actin related protein 2/3 complex, subunit 4 (predicted)                                                              |
| Asna1              | <b>0.49</b> | <b>0.00</b> | XM_001066031 | arsA arsenite transporter, ATP-binding, homolog 1 (bacterial)                                                         |
| Ass                | <b>0.65</b> | <b>0.00</b> | NM_013157    | argininosuccinate synthetase                                                                                          |
| Astn1              | <b>0.64</b> | <b>0.01</b> | XM_222785    | astrotactin 1                                                                                                         |
| Atp1a1             | <b>0.46</b> | <b>0.03</b> | NM_012504    | ATPase, Na <sup>+</sup> /K <sup>+</sup> transporting, alpha 1 polypeptide                                             |
| Atp6v0a2_predicted | <b>0.61</b> | <b>0.04</b> | NM_053775    | ATPase, H <sup>+</sup> transporting, lysosomal V0 subunit a isoform 2 (predicted)                                     |
| Atp6v0b_predicted  | <b>0.63</b> | <b>0.00</b> | XM_216510    | ATPase, H <sup>+</sup> transporting, V0 subunit B (predicted)                                                         |
| Atp6v1a1_predicted | <b>0.62</b> | <b>0.03</b> | XM_001060277 | ATPase, H transporting, lysosomal V1 subunit A (predicted)                                                            |
| Axl                | <b>0.63</b> | <b>0.01</b> | NM_001013147 | AXL receptor tyrosine kinase, transcript variant 2                                                                    |
| Aytl2_predicted    | <b>0.43</b> | <b>0.02</b> | XM_341747    | acyltransferase like 2 (predicted)                                                                                    |
| B3gnt6_predicted   | <b>0.64</b> | <b>0.01</b> | XM_219693    | UDP-GlcNAc:betaGal beta-1,3-N-acetylglucosaminyltransferase 6 (predicted)                                             |
| B4galt2_predicted  | <b>0.64</b> | <b>0.00</b> | XM_242992    | UDP-Gal:betaGlcNAc beta 1,4-galactosyltransferase, polypeptide 2 (predicted)                                          |
| Bap1_predicted     | <b>0.61</b> | <b>0.00</b> | XM_224614    | Bra1 associated protein 1 (predicted)                                                                                 |
| Bat2               | <b>0.45</b> | <b>0.02</b> | NM_212462    | HLA-B associated transcript 2                                                                                         |
| Bcan               | <b>0.61</b> | <b>0.02</b> | NM_012916    | brevican, transcript variant 2                                                                                        |
| Bcas1              | <b>0.26</b> | <b>0.01</b> | BC103480     | breast carcinoma amplified sequence 1 (cDNA clone IMAGE:7939378)                                                      |
| Bckdk              | <b>0.64</b> | <b>0.00</b> | NM_019244    | branched chain ketoacid dehydrogenase kinase                                                                          |
| Bcl2l13_predicted  | <b>0.66</b> | <b>0.00</b> | XM_232252    | BCL2-like 13 (apoptosis facilitator) (predicted)                                                                      |
| BE119829           | <b>0.34</b> | <b>0.02</b> | BE119829     | cDNA clone UI-R-CA0-ban-e-05-0-UI 3'                                                                                  |
| Begain             | <b>0.64</b> | <b>0.00</b> | NM_024163    | brain-enriched guanylate kinase-associated                                                                            |
| Bmp4               | <b>0.55</b> | <b>0.00</b> | NM_012827    | bone morphogenetic protein 4                                                                                          |
| Bmsc-UbP           | <b>0.47</b> | <b>0.00</b> | NM_001004247 | bone marrow stromal cell-derived ubiquitin-like protein                                                               |
| Bmyc_mapped        | <b>0.63</b> | <b>0.00</b> | NM_001013163 | brain expressed myelocytomatosis oncogene (mapped)                                                                    |
| Brf1_predicted     | <b>0.48</b> | <b>0.00</b> | XM_216801    | BRF1 homolog, subunit of RNA polymerase III transcription initiation factor IIIB ( <i>S. cerevisiae</i> ) (predicted) |
| Btbd9              | <b>0.55</b> | <b>0.00</b> | NM_00101307  | BTB (POZ) domain containing 9                                                                                         |



|                   |             |             |                  |                                                              |
|-------------------|-------------|-------------|------------------|--------------------------------------------------------------|
|                   |             |             | 3                |                                                              |
| Bzrap1            | <b>0.52</b> | <b>0.01</b> | XM_213427        | RIM binding protein 1                                        |
| C1ql1_predicted   | <b>0.59</b> | <b>0.00</b> | XM_343971        | complement component 1, q subcomponent-like 1 (predicted)    |
| C9                | <b>0.66</b> | <b>0.01</b> | NM_057146        | complement component 9                                       |
| Cables1_predicted | <b>0.57</b> | <b>0.00</b> | XM_226165        | Cdk5 and Abl enzyme substrate 1 (predicted)                  |
| Cabp1             | <b>0.61</b> | <b>0.01</b> | NM_133529        | calcium binding protein 1, transcript variant 1              |
| Cacna1g           | <b>0.66</b> | <b>0.02</b> | NM_031601        | calcium channel, voltage-dependent, T type, alpha 1G subunit |
| Cacng3            | <b>0.54</b> | <b>0.00</b> | NM_080691        | calcium channel, voltage-dependent, gamma subunit 3          |
| Cacng7            | <b>0.49</b> | <b>0.00</b> | NM_080695        | calcium channel, voltage-dependent, gamma subunit 7          |
| Calcoco1          | <b>0.57</b> | <b>0.00</b> | NM_139190        | calcium binding and coiled coil domain 1                     |
| Camk2g            | <b>0.58</b> | <b>0.00</b> | NM_133605        | calcium/calmodulin-dependent protein kinase II gamma         |
| Camk2n2           | <b>0.47</b> | <b>0.00</b> | NM_021678        | calcium/calmodulin-dependent protein kinase II inhibitor 2   |
| Camkk2            | <b>0.57</b> | <b>0.00</b> | NM_031338        | calcium/calmodulin-dependent protein kinase kinase 2, beta   |
| Camta2_predicted  | <b>0.49</b> | <b>0.01</b> | XM_213362        | similar to Calmodulin binding transcription activator 2      |
| Cap1              | <b>0.56</b> | <b>0.00</b> | NM_022383        | CAP, adenylate cyclase-associated protein 1 (yeast)          |
| Cat               | <b>0.60</b> | <b>0.00</b> | NM_012520        | catalase                                                     |
| Cd14              | <b>0.47</b> | <b>0.00</b> | NM_021744        | CD14 antigen                                                 |
| Cdk9              | <b>0.60</b> | <b>0.00</b> | NM_00100774<br>3 | cyclin-dependent kinase 9 (CDC2-related kinase)              |
| Ceacam10          | <b>0.35</b> | <b>0.04</b> | NM_173339        | CEA-related cell adhesion molecule 10                        |
| Cenpb_predicted   | <b>0.62</b> | <b>0.00</b> | XM_342521        | centromere autoantigen B (predicted)                         |
| Cfl1              | <b>0.65</b> | <b>0.00</b> | NM_017147        | cofilin 1, non-muscle                                        |
| Chl1              | <b>0.50</b> | <b>0.05</b> | XM_00107784<br>3 | cell adhesion molecule with homology to L1CAM                |
| Chrna5            | <b>0.58</b> | <b>0.00</b> | NM_017078        | cholinergic receptor, nicotinic, alpha polypeptide 5         |
| Chst2_predicted   | <b>0.66</b> | <b>0.00</b> | XM_345970        | carbohydrate sulfotransferase 2 (predicted)                  |
| Cirbp             | <b>0.62</b> | <b>0.00</b> | NM_031147        | cold inducible RNA binding protein                           |
| Clca3_predicted   | <b>0.66</b> | <b>0.03</b> | XM_217689        | chloride channel calcium activated 3 (predicted)             |
| Cldn11            | <b>0.52</b> | <b>0.00</b> | NM_053457        | claudin 11                                                   |
| Clstn1            | <b>0.44</b> | <b>0.01</b> | XM_243040        | calsyntenin 1                                                |
| Clybl             | <b>0.65</b> | <b>0.00</b> | XM_240311        | citrate lyase beta like                                      |
| Cnih2             | <b>0.63</b> | <b>0.00</b> | NM_00102513      | cornichon homolog 2 (Drosophila)                             |

|                   |             |             |              |                                                                    |
|-------------------|-------------|-------------|--------------|--------------------------------------------------------------------|
|                   |             |             | 2            |                                                                    |
| Cnksr1            | <b>0.52</b> | <b>0.02</b> | NM_001039011 | connector enhancer of kinase suppressor of Ras 1                   |
| Cnp1              | <b>0.48</b> | <b>0.00</b> | NM_012809    | cyclic nucleotide phosphodiesterase 1                              |
| Col11a2_mapped    | <b>0.61</b> | <b>0.04</b> | NM_212528    | procollagen, type XI, alpha 2 (mapped)                             |
| Cpsf1_predicted   | <b>0.66</b> | <b>0.00</b> | XM_345849    | cleavage and polyadenylation specific factor 1, 160kDa (predicted) |
| Crat              | <b>0.42</b> | <b>0.01</b> | NM_001004085 | carnitine acetyltransferase                                        |
| Crmp1             | <b>0.48</b> | <b>0.00</b> | NM_012932    | collapsin response mediator protein 1                              |
| Cry2              | <b>0.66</b> | <b>0.00</b> | NM_133405    | cryptochrome 2 (photolyase-like)                                   |
| Csdc2             | <b>0.48</b> | <b>0.01</b> | XM_345860    | cold shock domain containing C2, RNA binding                       |
| Csh111            | <b>0.49</b> | <b>0.03</b> | NM_033233    | chorionic somatomammotropin hormone 1-like 1                       |
| Csnk1g2           | <b>0.55</b> | <b>0.00</b> | NM_023102    | casein kinase 1, gamma 2, (transcript variant 2                    |
| Ctnna2_predicted  | <b>0.60</b> | <b>0.00</b> | XM_232077    | catenin (cadherin associated protein), alpha 2 (predicted)         |
| Ctps_predicted    | <b>0.65</b> | <b>0.00</b> | XM_233467    | cytidine 5'-triphosphate synthase (predicted)                      |
| Ctxn              | <b>0.55</b> | <b>0.00</b> | XM_001065365 | cortexin                                                           |
| Cugbp1            | <b>0.41</b> | <b>0.01</b> | NM_001025421 | CUG triplet repeat, RNA binding protein 1                          |
| Cull1_predicted   | <b>0.58</b> | <b>0.00</b> | XM_342679    | cullin 1 (predicted)                                               |
| Dbccr1            | <b>0.63</b> | <b>0.00</b> | NM_080482    | deleted in bladder cancer chromosome region candidate 1 (human)    |
| Dcamk13_predicted | <b>0.65</b> | <b>0.00</b> | XM_236661    | doublecortin and CaM kinase-like 3 (predicted)                     |
| Ddb1              | <b>0.64</b> | <b>0.01</b> | NM_171995    | damage-specific DNA binding protein 1                              |
| Ddhd1             | <b>0.60</b> | <b>0.03</b> | NM_001033066 | DDHD domain containing 1                                           |
| Ddn               | <b>0.48</b> | <b>0.00</b> | NM_030993    | dendrin                                                            |
| Ddx28_predicted   | <b>0.57</b> | <b>0.01</b> | XM_344762    | DEAD (Asp-Glu-Ala-Asp) box polypeptide 28 (predicted)              |
| Depdc1b_predicted | <b>0.54</b> | <b>0.04</b> | XM_226798    | DEP domain containing 1B (predicted)                               |
| Dhx8              | <b>0.57</b> | <b>0.01</b> | XM_213460    | DEAH (Asp-Glu-Ala-His) box polypeptide 8                           |
| Dlgap3            | <b>0.42</b> | <b>0.00</b> | NM_173138    | discs, large (Drosophila) homolog-associated protein 3             |
| Dlgh3             | <b>0.45</b> | <b>0.00</b> | NM_031639    | discs, large homolog 3 (Drosophila)                                |
| Dmwd              | <b>0.35</b> | <b>0.00</b> | XM_001075375 | dystrophia myotonica-containing WD repeat motif                    |
| Dnajb11           | <b>0.63</b> | <b>0.00</b> | NM_001015021 | DnaJ (Hsp40) homolog, subfamily B, member 11                       |

|                   |             |             |              |                                                                       |
|-------------------|-------------|-------------|--------------|-----------------------------------------------------------------------|
| Dnajc14           | <b>0.62</b> | <b>0.00</b> | NM_053690    | DnaJ (Hsp40) homolog, subfamily C, member 14                          |
| Dnajc17_predicted | <b>0.53</b> | <b>0.01</b> | XM_230468    | DnaJ (Hsp40) homolog, subfamily C, member 17 (predicted)              |
| Dnalc4            | <b>0.33</b> | <b>0.03</b> | NM_001009666 | dynein, axonemal, light chain 4                                       |
| Dpf2_predicted    | <b>0.54</b> | <b>0.00</b> | XM_341998    | D4, zinc and double PHD fingers family 2 (predicted) =                |
| Dscam11_predicted | <b>0.45</b> | <b>0.01</b> | XM_236203    | Down syndrome cell adhesion molecule-like 1 (predicted)               |
| Dullard           | <b>0.65</b> | <b>0.00</b> | XM_001080620 | Dullard homolog ( <i>Xenopus laevis</i> )                             |
| Dusp15_predicted  | <b>0.32</b> | <b>0.03</b> | XM_342545    | dual specificity phosphatase-like 15 (predicted)                      |
| Dusp8_predicted   | <b>0.60</b> | <b>0.02</b> | XM_341963    | dual specificity phosphatase 8 (predicted)                            |
| Edg1              | <b>0.62</b> | <b>0.01</b> | NM_017301    | endothelial differentiation sphingolipid G-protein-coupled receptor 1 |
| Eef1a2            | <b>0.58</b> | <b>0.00</b> | NM_012660    | eukaryotic translation elongation factor 1 alpha 2                    |
| Efhd2             | <b>0.57</b> | <b>0.00</b> | NM_001031648 | EF hand domain containing 2                                           |
| Efna3             | <b>0.62</b> | <b>0.00</b> | XM_001072657 | ephrin A3, transcript variant 2                                       |
| Ehbp1_predicted   | <b>0.62</b> | <b>0.00</b> | XM_223664    | EH domain binding protein 1 (predicted)                               |
| Ei24              | <b>0.60</b> | <b>0.00</b> | NM_001025660 | etoposide induced 2.4                                                 |
| Eif2ak3           | <b>0.65</b> | <b>0.01</b> | NM_031599    | eukaryotic translation initiation factor 2 alpha kinase 3             |
| Eif2b1            | <b>0.65</b> | <b>0.00</b> | NM_172029    | eukaryotic translation initiation factor 2B, subunit 1 alpha          |
| Eif4g3_predicted  | <b>0.43</b> | <b>0.02</b> | XM_216563    | eukaryotic translation initiation factor 4 gamma, 3 (predicted)       |
| Elmo2             | <b>0.50</b> | <b>0.00</b> | XM_342579    | engulfment and cell motility 2, ced-12 homolog ( <i>C. elegans</i> )  |
| Entpd4_predicted  | <b>0.63</b> | <b>0.00</b> | XM_341346    | ectonucleoside triphosphate diphosphohydrolase 4 (predicted)          |
| Epb4.9_predicted  | <b>0.32</b> | <b>0.04</b> | XM_341352    | erythrocyte protein band 4.9 (predicted)                              |
| Epdr2             | <b>0.65</b> | <b>0.00</b> | NM_001007625 | ependymin related protein 2 (zebrafish)                               |
| Epha8             | <b>0.64</b> | <b>0.03</b> | XM_342952    | Eph receptor A8                                                       |
| Ephb3_predicted   | <b>0.60</b> | <b>0.02</b> | XM_221311    | Eph receptor B3 (predicted)                                           |
| Eral1             | <b>0.50</b> | <b>0.00</b> | NM_00101322  | Era (G-protein)-like 1 ( <i>E. coli</i> )                             |

|                  |             |             |              |                                                                                                   |
|------------------|-------------|-------------|--------------|---------------------------------------------------------------------------------------------------|
|                  |             |             | 9            |                                                                                                   |
| Ercc6_predicted  | <b>0.57</b> | <b>0.01</b> | XM_224627    | excision repair cross-complementing rodent repair deficiency, complementation group 6 (predicted) |
| Exosc6_predicted | <b>0.52</b> | <b>0.01</b> | XM_226471    | exosome component 6 (predicted)                                                                   |
| Faim2            | <b>0.63</b> | <b>0.02</b> | NM_144756    | Fas apoptotic inhibitory molecule 2                                                               |
| Fbxl4_predicted  | <b>0.51</b> | <b>0.00</b> | XM_232833    | F-box and leucine-rich repeat protein 4 (predicted)                                               |
| Fech_predicted   | <b>0.60</b> | <b>0.00</b> | XM_341622    | ferrochelatase (predicted)                                                                        |
| Fgfr1            | <b>0.62</b> | <b>0.00</b> | NM_024146    | Fibroblast growth factor receptor 1                                                               |
| Fgfr3            | <b>0.46</b> | <b>0.00</b> | NM_053429    | fibroblast growth factor receptor 3                                                               |
| Fibp             | <b>0.66</b> | <b>0.00</b> | NM_172334    | fibroblast growth factor (acidic) intracellular binding protein                                   |
| Fjx1_predicted   | <b>0.54</b> | <b>0.00</b> | XM_345408    | four jointed box 1 (Drosophila) (predicted)                                                       |
| Fkbp8            | <b>0.45</b> | <b>0.00</b> | NM_001037180 | FK506 binding protein 8                                                                           |
| Fkbp9            | <b>0.65</b> | <b>0.03</b> | NM_001007646 | FK506 binding protein 9                                                                           |
| Fln29            | <b>0.57</b> | <b>0.00</b> | XM_341086    | FLN29 gene product                                                                                |
| Fmn2_predicted   | <b>0.60</b> | <b>0.02</b> | XM_001058601 | formin 2 (predicted)                                                                              |
| Folr4_predicted  | <b>0.56</b> | <b>0.02</b> | XM_345898    | similar to folate receptor 3                                                                      |
| Foxe1            | <b>0.27</b> | <b>0.00</b> | NM_138909    | forkhead box E1 (thyroid transcription factor 2)                                                  |
| Fstl4_predicted  | <b>0.56</b> | <b>0.01</b> | XM_220408    | follicle-stimulating-like 4 (predicted)                                                           |
| Ftsj2_predicted  | <b>0.59</b> | <b>0.02</b> | XM_221949    | FtsJ homolog 2 (E. coli) (predicted)                                                              |
| Fxr2h_predicted  | <b>0.65</b> | <b>0.00</b> | XM_213335    | fragile X mental retardation gene 2, autosomal homolog (predicted)                                |
| Fzd2             | <b>0.56</b> | <b>0.01</b> | NM_172035    | frizzled homolog 2 (Drosophila)                                                                   |
| Fzr1_predicted   | <b>0.63</b> | <b>0.00</b> | XM_243390    | fizzy/cell division cycle 20 related 1 (Drosophila) (predicted)                                   |
| Gabra5           | <b>0.61</b> | <b>0.01</b> | NM_017295    | gamma-aminobutyric acid (GABA-A) receptor, subunit alpha 5                                        |
| Gbl              | <b>0.55</b> | <b>0.04</b> | NM_022404    | G protein beta subunit-like                                                                       |
| Gcn5l2_predicted | <b>0.64</b> | <b>0.00</b> | XM_239340    | GCN5 general control of amino acid synthesis-like 2 (yeast) (predicted)                           |
| Gdi1             | <b>0.39</b> | <b>0.00</b> | NM_017088    | guanosine diphosphate dissociation inhibitor 1                                                    |
| Ghrl             | <b>0.53</b> | <b>0.02</b> | NM_021669    | ghrelin precursor                                                                                 |
| Gja12_predicted  | <b>0.57</b> | <b>0.00</b> | XM_573100    | gap junction protein, alpha 12, 47kDa (predicted) (Gja12_predicted), mRNA                         |
| Gjb1             | <b>0.45</b> | <b>0.02</b> | NM_017251    | gap junction membrane channel protein beta 1                                                      |
| Gje1             | <b>0.65</b> | <b>0.02</b> | XM_221997    | gap junction membrane channel protein epsilon 1                                                   |
| Gna12            | <b>0.49</b> | <b>0.00</b> | NM_031034    | guanine nucleotide binding protein, alpha 12                                                      |
| Gnaq             | <b>0.64</b> | <b>0.01</b> | NM_031036    | guanine nucleotide binding protein, alpha q                                                       |

|                  |             |             |              |                                                                         |
|------------------|-------------|-------------|--------------|-------------------------------------------------------------------------|
|                  |             |             |              | polypeptide                                                             |
| Gnb2             | <b>0.63</b> | <b>0.00</b> | NM_031037    | guanine nucleotide binding protein, beta polypeptide 2                  |
| Gng7             | <b>0.50</b> | <b>0.00</b> | NM_024138    | guanine nucleotide binding protein, gamma 7                             |
| Gnl1             | <b>0.64</b> | <b>0.00</b> | NM_212500    | guanine nucleotide binding protein-like 1                               |
| Gnl2             | <b>0.56</b> | <b>0.00</b> | NM_001025736 | guanine nucleotide binding protein-like 2 (nucleolar)                   |
| Gnptg            | <b>0.56</b> | <b>0.01</b> | XM_213240    | N-acetylglucosamine-1-phosphotransferase, gamma subunit                 |
| Gorasp2          | <b>0.56</b> | <b>0.01</b> | NM_001007720 | golgi reassembly stacking protein 2                                     |
| Gp5              | <b>0.34</b> | <b>0.04</b> | NM_012795    | glycoprotein 5, platelet                                                |
| Gpr123_predicted | <b>0.65</b> | <b>0.00</b> | XM_219468    | G protein-coupled receptor 123 (predicted)                              |
| Gpr56            | <b>0.63</b> | <b>0.03</b> | NM_152242    | G protein-coupled receptor 56                                           |
| Gpsn2            | <b>0.55</b> | <b>0.00</b> | NM_138549    | glycoprotein, synaptic 2                                                |
| Grifin           | <b>0.51</b> | <b>0.05</b> | NM_057187    | galectin-related inter-fiber protein                                    |
| Grik3            | <b>0.41</b> | <b>0.03</b> | NM_181373    | glutamate receptor, ionotropic, kainate 3                               |
| Grik5            | <b>0.59</b> | <b>0.00</b> | NM_017262    | glutamate receptor, ionotropic, kainate 5                               |
| Grm5             | <b>0.57</b> | <b>0.00</b> | NM_017012    | glutamate receptor, metabotropic 5                                      |
| Grwd1            | <b>0.64</b> | <b>0.00</b> | NM_001012067 | glutamate-rich WD repeat containing 1                                   |
| Gstm1            | <b>0.63</b> | <b>0.00</b> | NM_017014    | glutathione S-transferase, mu 1                                         |
| Gtf2h4           | <b>0.65</b> | <b>0.00</b> | NM_212501    | general transcription factor II H, polypeptide 4                        |
| Gtf3c1           | <b>0.62</b> | <b>0.00</b> | NM_133541    | general transcription factor III C 1                                    |
| Gylt1b           | <b>0.59</b> | <b>0.01</b> | NM_199107    | glycosyltransferase-like 1B                                             |
| Hapln4_predicted | <b>0.60</b> | <b>0.01</b> | XM_341416    | hyaluronan and proteoglycan link protein 4 (predicted)                  |
| Hcn2             | <b>0.37</b> | <b>0.00</b> | NM_053684    | hyperpolarization activated cyclic nucleotide-gated potassium channel 2 |
| Hes5             | <b>0.50</b> | <b>0.00</b> | NM_024383    | hairy and enhancer of split 5 (Drosophila)                              |
| Hes7_predicted   | <b>0.42</b> | <b>0.02</b> | XM_220597    | hairy and enhancer of split 7 (Drosophila) (predicted)                  |
| Hibch            | <b>0.65</b> | <b>0.00</b> | NM_001013112 | 3-hydroxyisobutyryl-Coenzyme A hydrolase                                |
| Hnrpl            | <b>0.56</b> | <b>0.00</b> | XM_001068191 | heterogeneous nuclear ribonucleoprotein L                               |
| Hpcal4           | <b>0.64</b> | <b>0.01</b> | NM_017357    | hippocalcin-like 4                                                      |
| Hs3st1           | <b>0.64</b> | <b>0.01</b> | NM_053391    | heparan sulfate (glucosamine) 3-O-sulfotransferase 1                    |
| Hs3st5_predicted | <b>0.59</b> | <b>0.01</b> | XM_228219    | heparan sulfate (glucosamine) 3-O-sulfotransferase 5 (predicted)        |
| Hspb6            | <b>0.61</b> | <b>0.04</b> | NM_138887    | heat shock protein, alpha-crystallin-related, B6                        |
| Iars2_predicted  | <b>0.64</b> | <b>0.00</b> | XM_001065536 | isoleucine-tRNA synthetase 2, mitochondrial (predicted)                 |

|                   |             |             |              |                                                                                           |
|-------------------|-------------|-------------|--------------|-------------------------------------------------------------------------------------------|
| Igsf4b_predicted  | <b>0.59</b> | <b>0.03</b> | XM_341157    | immunoglobulin superfamily, member 4B (predicted)                                         |
| Il17r_predicted   | <b>0.44</b> | <b>0.01</b> | XM_232247    | interleukin 17 receptor (predicted)                                                       |
| Il1rl1            | <b>0.37</b> | <b>0.04</b> | NM_001013432 | interleukin 1 receptor-like 1 ligand                                                      |
| Il3ra             | <b>0.62</b> | <b>0.01</b> | NM_139260    | interleukin 3 receptor, alpha chain (Il3ra)                                               |
| Il6st             | <b>0.58</b> | <b>0.01</b> | NM_001008725 | interleukin 6 signal transducer                                                           |
| Inhbb             | <b>0.54</b> | <b>0.03</b> | XM_344130    | inhibin beta-B                                                                            |
| Inpp1             | <b>0.53</b> | <b>0.00</b> | NM_022944    | inositol polyphosphate phosphatase-like 1                                                 |
| Insig1            | <b>0.64</b> | <b>0.02</b> | NM_022392    | insulin induced gene 1                                                                    |
| Irx11_predicted   | <b>0.53</b> | <b>0.01</b> | XM_214497    | iroquois homeobox protein-like 1 (predicted)                                              |
| Itm2c             | <b>0.57</b> | <b>0.03</b> | NM_001009674 | integral membrane protein 2C                                                              |
| Itsn1             | <b>0.61</b> | <b>0.00</b> | XM_573259    | intersectin 1                                                                             |
| Jph3_predicted    | <b>0.61</b> | <b>0.00</b> | XM_226549    | junctionophilin 3 (predicted)                                                             |
| Kcna5             | <b>0.65</b> | <b>0.02</b> | NM_012972    | potassium voltage-gated channel, shaker-related subfamily, member 5                       |
| Kcnip2            | <b>0.58</b> | <b>0.02</b> | NM_020094    | Kv channel-interacting protein 2, transcript variant a                                    |
| Kcnk3             | <b>0.54</b> | <b>0.01</b> | NM_033376    | potassium channel, subfamily K, member 3                                                  |
| Kcnk4             | <b>0.65</b> | <b>0.01</b> | NM_053804    | potassium channel, subfamily K, member 4                                                  |
| Kcnn1             | <b>0.64</b> | <b>0.04</b> | NM_019313    | potassium intermediate/small conductance calcium-activated channel, subfamily N, member 1 |
| Kif5c_predicted   | <b>0.51</b> | <b>0.00</b> | XM_241981    | kinesin family member 5C (predicted)                                                      |
| Kifc3             | <b>0.48</b> | <b>0.00</b> | XM_240978    | kinesin family member C3                                                                  |
| Kirrel3_predicted | <b>0.60</b> | <b>0.02</b> | XM_235986    | kin of IRRE like 3 (Drosophila) (predicted)                                               |
| Klc2_predicted    | <b>0.53</b> | <b>0.00</b> | XM_219696    | similar to Klc2 protein                                                                   |
| Klhdc3            | <b>0.54</b> | <b>0.00</b> | NM_001012203 | kelch domain containing 3                                                                 |
| Klhl22_predicted  | <b>0.44</b> | <b>0.01</b> | XM_221268    | kelch-like 22 (Drosophila) (predicted)                                                    |
| Klhl5             | <b>0.62</b> | <b>0.00</b> | XM_223418    | kelch-like 5 (Drosophila)                                                                 |
| Klk6              | <b>0.48</b> | <b>0.00</b> | NM_019175    | kallikrein 6                                                                              |
| Kynu              | <b>0.64</b> | <b>0.02</b> | NM_053902    | kynureninase (L-kynurenine hydrolase)                                                     |
| Large_predicted   | <b>0.49</b> | <b>0.00</b> | XM_341645    | like-glycosyltransferase (predicted)                                                      |
| Lars              | <b>0.64</b> | <b>0.00</b> | NM_001009637 | leucyl-tRNA synthetase                                                                    |
| Lass2             | <b>0.55</b> | <b>0.00</b> | NM_001033700 | longevity assurance homolog 2 (S. cerevisiae)                                             |
| Lcmt2             | <b>0.62</b> | <b>0.01</b> | NM_001011956 | leucine carboxyl methyltransferase 2                                                      |
| Lhfp12_predicted  | <b>0.56</b> | <b>0.03</b> | XM_226668    | lipoma HMGIC fusion partner-like 2                                                        |

|                  |             |             |              |                                                                              |
|------------------|-------------|-------------|--------------|------------------------------------------------------------------------------|
| d                |             |             |              | (predicted)                                                                  |
| Lman2l_predicted | <b>0.65</b> | <b>0.00</b> | XM_217385    | lectin, mannose-binding 2-like (predicted)                                   |
| LOC246295        | <b>0.58</b> | <b>0.01</b> | XM_575968    | glycine-, glutamate-, thienylcyclohexylpiperidine-binding protein            |
| LOC364637        | <b>0.48</b> | <b>0.02</b> | NM_001014239 | similar to F-box only protein 25                                             |
| LOC365842        | <b>0.60</b> | <b>0.00</b> | NM_001014254 | similar to CDC-like kinase 2                                                 |
| LOC501281        | <b>0.62</b> | <b>0.04</b> | XM_576696    | similar to RAN binding protein 3 isoform RANBP3-b                            |
| LOC501619        | <b>0.65</b> | <b>0.01</b> | NM_001024367 | similar to 40S ribosomal protein S29                                         |
| LOC502382        | <b>0.61</b> | <b>0.05</b> | XM_001077835 | similar to forkhead box B1                                                   |
| LOC686098        | <b>0.49</b> | <b>0.00</b> | XM_001066536 | similar to sorbin and SH3 domain containing 1 isoform 3                      |
| LOC689788        | <b>0.59</b> | <b>0.03</b> | XM_001072014 | similar to PR domain containing 5                                            |
| LOC690297        | <b>0.65</b> | <b>0.00</b> | XM_001074000 | similar to PWP2 periodic tryptophan protein homolog                          |
| Lrfn5_predicted  | <b>0.63</b> | <b>0.00</b> | XM_234219    | leucine rich repeat and fibronectin type III domain containing 5 (predicted) |
| Lrpprc           | <b>0.39</b> | <b>0.04</b> | NM_001008519 | leucine-rich PPR-motif containing                                            |
| Lrrc8d           | <b>0.62</b> | <b>0.03</b> | NM_001008338 | leucine rich repeat containing 8 family, member D                            |
| Lyn              | <b>0.59</b> | <b>0.03</b> | NM_030857    | Yamaguchi sarcoma viral (v-yes-1) oncogene homolog                           |
| Lynx1_predicted  | <b>0.63</b> | <b>0.00</b> | XM_216965    | Ly6/neurotoxin 1 (predicted)                                                 |
| M6pr             | <b>0.61</b> | <b>0.00</b> | BU759970     | cDNA clone IMAGE:7362542 3'                                                  |
| Madd             | <b>0.52</b> | <b>0.00</b> | NM_053585    | MAP-kinase activating death domain (Madd),                                   |
| Mag              | <b>0.65</b> | <b>0.04</b> | NM_017190    | myelin-associated glycoprotein                                               |
| Mal              | <b>0.48</b> | <b>0.00</b> | NM_012798    | myelin and lymphocyte protein, T-cell differentiation protein                |
| Man1c1_predicted | <b>0.46</b> | <b>0.01</b> | XM_342943    | mannosidase, alpha, class 1C, member 1 (predicted)                           |
| Maob             | <b>0.57</b> | <b>0.00</b> | NM_013198    | monoamine oxidase B                                                          |
| Map1b            | <b>0.36</b> | <b>0.00</b> | XM_215469    | microtubule-associated protein 1b                                            |
| Map3k3_predicted | <b>0.54</b> | <b>0.02</b> | XM_221034    | mitogen activated protein kinase kinase kinase 3 (predicted)                 |
| Mapk3            | <b>0.29</b> | <b>0.00</b> | NM_017347    | mitogen activated protein kinase 3                                           |
| Mapk8ip2         | <b>0.60</b> | <b>0.03</b> | XM_235565    | mitogen-activated protein kinase 8 interacting protein 2                     |
| Mapkapk3         | <b>0.64</b> | <b>0.02</b> | NM_00101212  | mitogen-activated protein kinase-activated                                   |

|                  |             |             |              |                                                                                                         |
|------------------|-------------|-------------|--------------|---------------------------------------------------------------------------------------------------------|
|                  |             |             | 7            | protein kinase 3                                                                                        |
| Mapre3           | <b>0.49</b> | <b>0.00</b> | NM_001007656 | microtubule-associated protein, RP/EB family, member 3                                                  |
| March8_predicted | <b>0.43</b> | <b>0.00</b> | XM_232293    | membrane-associated ring finger (C3HC4) 8 (predicted)                                                   |
| Max              | <b>0.63</b> | <b>0.01</b> | NM_022210    | Max protein                                                                                             |
| Mbp              | <b>0.44</b> | <b>0.00</b> | NM_001025291 | myelin basic protein, transcript variant 1,                                                             |
| Mfn2             | <b>0.46</b> | <b>0.04</b> | NM_130894    | mitofusin 2                                                                                             |
| Mgat3            | <b>0.58</b> | <b>0.00</b> | NM_019239    | mannoside acetyl glucosaminyltransferase 3                                                              |
| Mgat5b_predicted | <b>0.52</b> | <b>0.03</b> | XM_221136    | mannoside acetylglucosaminyltransferase 5, isoenzyme B (predicted)                                      |
| MGC72997         | <b>0.41</b> | <b>0.04</b> | NM_001009537 | similar to 6030490I01Rik                                                                                |
| Mlh1             | <b>0.47</b> | <b>0.05</b> | NM_031053    | mutL homolog 1 (E. coli)                                                                                |
| Mmp17_predicted  | <b>0.48</b> | <b>0.00</b> | XM_239639    | matrix metalloproteinase 17 (predicted)                                                                 |
| Mocs3_predicted  | <b>0.55</b> | <b>0.00</b> | XM_230874    | molybdenum cofactor synthesis 3 (predicted)                                                             |
| Mpped1_predicted | <b>0.54</b> | <b>0.00</b> | XM_343301    | metallophosphoesterase domain containing 1 (predicted)                                                  |
| Mrpl3_predicted  | <b>0.66</b> | <b>0.01</b> | XM_217239    | mitochondrial ribosomal protein L3 (predicted)                                                          |
| Mrpl38           | <b>0.63</b> | <b>0.00</b> | NM_001009369 | mitochondrial ribosomal protein L38                                                                     |
| Mtap6            | <b>0.62</b> | <b>0.01</b> | NM_017204    | microtubule-associated protein 6                                                                        |
| Mtmr7_predicted  | <b>0.65</b> | <b>0.00</b> | XM_240417    | myotubularin related protein 7 (predicted)                                                              |
| Myo5b            | <b>0.63</b> | <b>0.01</b> | NM_017083    | myosin 5B                                                                                               |
| Mypn_predicted   | <b>0.35</b> | <b>0.00</b> | XM_228149    | myopalladin (predicted)                                                                                 |
| Myst2            | <b>0.59</b> | <b>0.02</b> | NM_181081    | MYST histone acetyltransferase 2                                                                        |
| Ncdn             | <b>0.46</b> | <b>0.00</b> | NM_053543    | neurochondrin                                                                                           |
| Nei1             | <b>0.51</b> | <b>0.03</b> | NM_001025754 | nei endonuclease VIII-like 1 (E. coli)                                                                  |
| Nek6             | <b>0.54</b> | <b>0.00</b> | NM_182953    | NIMA (never in mitosis gene a)-related expressed kinase 6                                               |
| Neu3             | <b>0.60</b> | <b>0.03</b> | NM_054010    | neuraminidase 3                                                                                         |
| Nfkb2            | <b>0.63</b> | <b>0.00</b> | NM_001008349 | nuclear factor of kappa light polypeptide gene enhancer in B-cells 2, p49/p100                          |
| Nisch            | <b>0.46</b> | <b>0.02</b> | XM_240330    | nischarin                                                                                               |
| Nkx6-2_predicted | <b>0.53</b> | <b>0.00</b> | XM_219447    | NK6 transcription factor related, locus 2 (Drosophila) (predicted) (Nkx6-2_predicted), mRNA [XM_219447] |
| Nmnat1           | <b>0.64</b> | <b>0.01</b> | NM_00103755  | nicotinamide nucleotide adenylyltransferase 1                                                           |



|                   |             |             |              |                                                         |
|-------------------|-------------|-------------|--------------|---------------------------------------------------------|
|                   |             |             | 6            |                                                         |
| Npepl1_predicted  | <b>0.40</b> | <b>0.01</b> | XM_230892    | aminopeptidase-like 1 (predicted)                       |
| Nr1d1             | <b>0.65</b> | <b>0.01</b> | NM_145775    | nuclear receptor subfamily 1, group D, member 1         |
| Nr2c2             | <b>0.50</b> | <b>0.04</b> | NM_017323    | nuclear receptor subfamily 2, group C, member 2         |
| Nr2f1             | <b>0.54</b> | <b>0.04</b> | NM_031130    | nuclear receptor subfamily 2, group F, member 1         |
| Nrgn              | <b>0.57</b> | <b>0.00</b> | NM_024140    | neurogranin                                             |
| Nup62             | <b>0.57</b> | <b>0.01</b> | NM_023098    | nucleoporin 62                                          |
| Ogdhl_predicted   | <b>0.63</b> | <b>0.01</b> | XM_214261    | oxoglutarate dehydrogenase-like (predicted)             |
| Olr1071_predicted | <b>0.35</b> | <b>0.05</b> | NM_001000063 | olfactory receptor 1071 (predicted)                     |
| Olr1093_predicted | <b>0.49</b> | <b>0.02</b> | NM_001001388 | olfactory receptor 1093 (predicted)                     |
| Olr112_predicted  | <b>0.53</b> | <b>0.04</b> | NM_001000150 | olfactory receptor 112 (predicted)                      |
| Olr1485_predicted | <b>0.40</b> | <b>0.03</b> | NM_001000028 | olfactory receptor 1485 (predicted)                     |
| Olr471_predicted  | <b>0.55</b> | <b>0.03</b> | NM_001001125 | olfactory receptor 471 (predicted)                      |
| Olr821_predicted  | <b>0.55</b> | <b>0.00</b> | NM_001000842 | olfactory receptor 821 (predicted)                      |
| Omg               | <b>0.65</b> | <b>0.00</b> | NM_001005898 | oligodendrocyte-myelin glycoprotein                     |
| Opcml             | <b>0.63</b> | <b>0.00</b> | NM_053848    | opioid binding protein/cell adhesion molecule-like      |
| Pabpc4            | <b>0.60</b> | <b>0.00</b> | XM_216517    | similar to poly(A)-binding protein, cytoplasmic 4-like  |
| Pak3              | <b>0.60</b> | <b>0.00</b> | NM_019210    | p21 (CDKN1A)-activated kinase 3                         |
| Palm              | <b>0.43</b> | <b>0.00</b> | NM_130829    | paralemmin                                              |
| Parg              | <b>0.37</b> | <b>0.01</b> | NM_031339    | poly (ADP-ribose) glycohydrolase                        |
| Pcdh17_predicted  | <b>0.49</b> | <b>0.00</b> | XM_224389    | protocadherin 17 (predicted)                            |
| Pcdha4            | <b>0.58</b> | <b>0.03</b> | NM_053933    | protocadherin alpha 4                                   |
| Pcdhga11          | <b>0.58</b> | <b>0.02</b> | NM_001037153 | protocadherin gamma subfamily A, 11                     |
| Pcsk1n            | <b>0.49</b> | <b>0.00</b> | NM_019279    | proprotein convertase subtilisin/kexin type 1 inhibitor |
| Pfn1              | <b>0.64</b> | <b>0.00</b> | NM_022511    | profilin 1                                              |
| Phyhipl           | <b>0.61</b> | <b>0.01</b> | NM_001012076 | phytanoyl-CoA hydroxylase interacting protein-like      |
| Pias4             | <b>0.59</b> | <b>0.00</b> | XM_343155    | protein inhibitor of activated STAT, 4                  |

|                    |             |             |              |                                                                                                           |
|--------------------|-------------|-------------|--------------|-----------------------------------------------------------------------------------------------------------|
| Picalm             | <b>0.54</b> | <b>0.05</b> | NM_053554    | phosphatidylinositol binding clathrin assembly protein                                                    |
| Pigo_predicted     | <b>0.64</b> | <b>0.00</b> | XM_233141    | phosphatidylinositol glycan, class O (predicted)                                                          |
| Pigw               | <b>0.59</b> | <b>0.04</b> | NM_194461    | phosphatidylinositol glycan, class W                                                                      |
| Pik3ca             | <b>0.64</b> | <b>0.01</b> | XM_001059350 | phosphatidylinositol 3-kinase, catalytic, alpha polypeptide, transcript variant 2                         |
| Pld2               | <b>0.52</b> | <b>0.05</b> | NM_033299    | phospholipase D2                                                                                          |
| Plekhb2_predicted  | <b>0.45</b> | <b>0.00</b> | XM_217372    | pleckstrin homology domain containing, family B (evectins) member 2 (predicted)                           |
| Pltp_predicted     | <b>0.66</b> | <b>0.01</b> | XM_215939    | phospholipid transfer protein (predicted)                                                                 |
| Polr3c             | <b>0.62</b> | <b>0.03</b> | NM_001012081 | polymerase (RNA) III (DNA directed) polypeptide C                                                         |
| Ppfia3             | <b>0.46</b> | <b>0.00</b> | XM_341856    | protein tyrosine phosphatase, receptor type, f polypeptide (PTPRF), interacting protein (liprin), alpha 3 |
| Ppp1r13b_predicted | <b>0.62</b> | <b>0.01</b> | XM_234555    | protein phosphatase 1, regulatory (inhibitor) subunit 13B (predicted)                                     |
| Ppp1r14a           | <b>0.61</b> | <b>0.00</b> | NM_130403    | protein phosphatase 1, regulatory (inhibitor) subunit 14A                                                 |
| Ppp1r1b            | <b>0.56</b> | <b>0.00</b> | NM_138521    | protein phosphatase 1, regulatory (inhibitor) subunit 1B                                                  |
| Ppp2r4_predicted   | <b>0.60</b> | <b>0.01</b> | XM_342405    | protein phosphatase 2A, regulatory subunit B (PR 53) (predicted)                                          |
| Ppp3cb             | <b>0.64</b> | <b>0.00</b> | NM_017042    | protein phosphatase 3, catalytic subunit, beta isoform                                                    |
| Ppp5c              | <b>0.66</b> | <b>0.02</b> | NM_031729    | protein phosphatase 5, catalytic subunit                                                                  |
| Prdm4              | <b>0.63</b> | <b>0.00</b> | NM_133312    | PR domain containing 4                                                                                    |
| Prkag2             | <b>0.56</b> | <b>0.00</b> | NM_184051    | protein kinase, AMP-activated, gamma 2 non-catalytic subunit                                              |
| Prkcc              | <b>0.49</b> | <b>0.01</b> | NM_012628    | protein kinase C, gamma                                                                                   |
| PRKCQ              | <b>0.49</b> | <b>0.01</b> | XM_341553    | protein kinase C, theta, transcript variant 2                                                             |
| Prop1              | <b>0.38</b> | <b>0.05</b> | NM_153627    | paired like homeodomain factor 1                                                                          |
| Prpf8              | <b>0.49</b> | <b>0.04</b> | XM_213385    | pre-mRNA processing factor 8                                                                              |
| Psap               | <b>0.64</b> | <b>0.01</b> | NM_013013    | prosaposin                                                                                                |
| Psd                | <b>0.46</b> | <b>0.00</b> | XM_001066749 | pleckstrin and Sec7 domain containing, transcript variant 2                                               |
| Ptk9               | <b>0.64</b> | <b>0.00</b> | NM_001008521 | protein tyrosine kinase 9                                                                                 |
| Ptpn5              | <b>0.65</b> | <b>0.00</b> | NM_019253    | protein tyrosine phosphatase, non-receptor type 5                                                         |
| Ptprt_predicted    | <b>0.52</b> | <b>0.01</b> | XM_342568    | protein tyrosine phosphatase, receptor type, T (predicted)                                                |
| Qars               | <b>0.53</b> | <b>0.00</b> | NM_001007624 | glutaminyl-tRNA synthetase                                                                                |
| R3hdm1             | <b>0.53</b> | <b>0.00</b> | XM_573442    | R3H domain containing 1                                                                                   |

|                      |             |             |                  |                                                                                                             |
|----------------------|-------------|-------------|------------------|-------------------------------------------------------------------------------------------------------------|
| Rab11b               | <b>0.54</b> | <b>0.00</b> | NM_032617        | RAB11B, member RAS oncogene family                                                                          |
| Rab15                | <b>0.38</b> | <b>0.03</b> | M83679           | (clone LRB9) RAB15                                                                                          |
| Rab3a                | <b>0.58</b> | <b>0.00</b> | NM_013018        | RAB3A, member RAS oncogene family                                                                           |
| Rab40c               | <b>0.44</b> | <b>0.03</b> | NM_182675        | Rab40c, member RAS oncogene family                                                                          |
| Rac1                 | <b>0.64</b> | <b>0.01</b> | NM_134366        | ras-related C3 botulinum toxin substrate 1                                                                  |
| Rangap1              | <b>0.59</b> | <b>0.02</b> | NM_00101219<br>9 | RAN GTPase activating protein 1                                                                             |
| Rap1ga1              | <b>0.36</b> | <b>0.04</b> | XM_233609        | RAP1, GTPase activating protein 1                                                                           |
| Rarb                 | <b>0.55</b> | <b>0.03</b> | XM_223843        | retinoic acid receptor, beta                                                                                |
| Rasa3                | <b>0.27</b> | <b>0.03</b> | XM_225020        | RAS p21 protein activator 3                                                                                 |
| Rasl11b              | <b>0.56</b> | <b>0.00</b> | NM_00100283<br>0 | RAS-like family 11 member B                                                                                 |
| Rassf2               | <b>0.57</b> | <b>0.02</b> | NM_00103709<br>6 | Ras association (RalGDS/AF-6) domain family 2                                                               |
| Rbbp4_predicted      | <b>0.55</b> | <b>0.00</b> | XM_00106108<br>7 | retinoblastoma binding protein 4 (predicted)                                                                |
| Recql                | <b>0.64</b> | <b>0.00</b> | NM_00101209<br>8 | RecQ protein-like                                                                                           |
| Rev3l                | <b>0.65</b> | <b>0.02</b> | XM_228273        | REV3-like, catalytic subunit of DNA polymerase zeta RAD54 like ( <i>S. cerevisiae</i> )                     |
| RGD1304598_predicted | <b>0.64</b> | <b>0.02</b> | XM_220745        | similar to abhydrolase domain containing 1; alpha/beta hydrolase-1; lung alpha/beta hydrolase 1 (predicted) |
| RGD1304816_predicted | <b>0.57</b> | <b>0.00</b> | XM_342846        | similar to mKIAA0674 protein (predicted)                                                                    |
| RGD1304842_predicted | <b>0.50</b> | <b>0.00</b> | XM_232266        | similar to FLJ22405 protein (predicted)                                                                     |
| RGD1305090_predicted | <b>0.53</b> | <b>0.04</b> | XM_342916        | similar to CD2-associated protein (predicted)                                                               |
| RGD1305733           | <b>0.64</b> | <b>0.00</b> | NM_00101411<br>4 | similar to RIKEN cDNA 2900011O08                                                                            |
| RGD1306214_predicted | <b>0.47</b> | <b>0.01</b> | XM_229993        | similar to TGF-beta induced apoptosis protein 2 (predicted)                                                 |
| RGD1306755_predicted | <b>0.58</b> | <b>0.00</b> | XM_341301        | similar to 5730420B22Rik protein (predicted)                                                                |
| RGD1306841           | <b>0.60</b> | <b>0.00</b> | NM_00103389<br>2 | similar to RIKEN cDNA 2410006F12                                                                            |
| RGD1306924_predicted | <b>0.46</b> | <b>0.01</b> | XM_00107653<br>7 | similar to Gamma-tubulin complex component 4 (GCP-4) (predicted)                                            |
| RGD1306962_predicted | <b>0.66</b> | <b>0.01</b> | XM_220112        | similar to dJ55C23.6 gene product (predicted)                                                               |
| RGD1307225_predicted | <b>0.36</b> | <b>0.04</b> | XM_226983        | similar to MEGF6 (predicted)                                                                                |
| RGD1307801           | <b>0.34</b> | <b>0.02</b> | NM_00101403<br>1 | similar to RIKEN cDNA 1300018I05                                                                            |
| RGD1307929           | <b>0.35</b> | <b>0.00</b> | XM_220636        | similar to CG14967-PA                                                                                       |

|                      |             |             |              |                                                                                                           |
|----------------------|-------------|-------------|--------------|-----------------------------------------------------------------------------------------------------------|
| RGD1308350           | <b>0.51</b> | <b>0.01</b> | XM_001072750 | similar to hypothetical protein MGC13251                                                                  |
| RGD1308915           | <b>0.66</b> | <b>0.02</b> | NM_001014226 | similar to RIKEN cDNA 1200013P24                                                                          |
| RGD1309054_predicted | <b>0.66</b> | <b>0.04</b> | XM_214707    | similar to FKSG26 protein (predicted)                                                                     |
| RGD1309401           | <b>0.65</b> | <b>0.03</b> | NM_001014163 | similar to BM88 antigen                                                                                   |
| RGD1309744_predicted | <b>0.60</b> | <b>0.00</b> | XM_230574    | similar to hypothetical protein FLJ20507 (predicted), transcript variant 2                                |
| RGD1309823_predicted | <b>0.63</b> | <b>0.00</b> | XM_001067111 | similar to hypothetical protein FLJ21156 (predicted)                                                      |
| RGD1310147_predicted | <b>0.65</b> | <b>0.00</b> | XM_340793    | similar to TBC1 domain family, member 8; BUB2-like protein 1; vascular Rab-GAP/TBC-containing (predicted) |
| RGD1310800_predicted | <b>0.64</b> | <b>0.02</b> | XM_342577    | similar to RIKEN cDNA F730014I05 (predicted)                                                              |
| RGD1310827           | <b>0.44</b> | <b>0.03</b> | NM_001034010 | similar to RIKEN cDNA 1200009O22; EST AI316813                                                            |
| RGD1311375_predicted | <b>0.64</b> | <b>0.00</b> | XM_228301    | similar to RIKEN cDNA A530089I17 (predicted)                                                              |
| RGD1311552_predicted | <b>0.57</b> | <b>0.00</b> | XM_230503    | similar to KIAA0377-like protein (predicted)                                                              |
| RGD1311793_predicted | <b>0.40</b> | <b>0.04</b> | XM_224908    | similar to DNA segment, Chr 8, ERATO Doi 82, expressed (predicted)                                        |
| RGD1311937_predicted | <b>0.64</b> | <b>0.02</b> | XM_233470    | similar to hypothetical protein MGC17299 (predicted)                                                      |
| RGD1562258_predicted | <b>0.56</b> | <b>0.01</b> | XM_575576    | similar to PAP-1 binding protein (predicted)                                                              |
| RGD1563141_predicted | <b>0.56</b> | <b>0.00</b> | XM_001076724 | similar to SUN2 (predicted)                                                                               |
| RGD1565985_predicted | <b>0.62</b> | <b>0.05</b> | XM_576070    | similar to mKIAA0227 protein (predicted)                                                                  |
| Rhbd11               | <b>0.60</b> | <b>0.00</b> | XM_340773    | rhomboid, veinlet-like 1 (Drosophila)                                                                     |
| Rhog                 | <b>0.53</b> | <b>0.00</b> | NM_001037195 | Ras homolog gene family, member G                                                                         |
| RICS_predicted       | <b>0.63</b> | <b>0.00</b> | XM_236020    | RhoGAP involved in beta-catenin-N-cadherin and NMDA receptor signaling (predicted)                        |
| Rin1                 | <b>0.54</b> | <b>0.01</b> | NM_139038    | Ras and Rab interactor 1                                                                                  |
| Ring1                | <b>0.54</b> | <b>0.00</b> | NM_212549    | ring finger protein 1                                                                                     |
| Rln3                 | <b>0.41</b> | <b>0.04</b> | NM_170667    | relaxin 3                                                                                                 |
| Rnf26_predicted      | <b>0.53</b> | <b>0.04</b> | XM_236181    | ring finger protein 26 (predicted)                                                                        |
| Rps6ka4_predicted    | <b>0.52</b> | <b>0.01</b> | XM_342004    | ribosomal protein S6 kinase, polypeptide 4 (predicted)                                                    |
| Rpsud1_predict       | <b>0.62</b> | <b>0.01</b> | XM_213253    | RNA pseudouridylylate synthase domain                                                                     |

|                    |             |             |                  |                                                                                               |
|--------------------|-------------|-------------|------------------|-----------------------------------------------------------------------------------------------|
| ed                 |             |             |                  | containing 1 (predicted)                                                                      |
| Rtn4r12            | <b>0.38</b> | <b>0.02</b> | NM_181380        | reticulon 4 receptor-like 2                                                                   |
| Rufy1              | <b>0.62</b> | <b>0.00</b> | XM_340794        | RUN and FYVE domain containing 1                                                              |
| Rxrb               | <b>0.63</b> | <b>0.01</b> | NM_206849        | retinoid X receptor beta                                                                      |
| Scamp3             | <b>0.55</b> | <b>0.00</b> | XM_342279        | secretory carrier membrane protein 3                                                          |
| Scd2               | <b>0.58</b> | <b>0.00</b> | NM_031841        | stearoyl-Coenzyme A desaturase 2                                                              |
| Scn1b              | <b>0.55</b> | <b>0.03</b> | NM_017288        | sodium channel, voltage-gated, type I, beta                                                   |
| Scyl1              | <b>0.51</b> | <b>0.01</b> | NM_00101193<br>8 | SCY1-like 1 ( <i>S. cerevisiae</i> )                                                          |
| Sdccag10           | <b>0.65</b> | <b>0.00</b> | NM_00101319<br>9 | serologically defined colon cancer antigen 10                                                 |
| Sec31l1            | <b>0.55</b> | <b>0.00</b> | NM_033021        | SEC31-like 1 ( <i>S. cerevisiae</i> )                                                         |
| Sec61a1            | <b>0.57</b> | <b>0.01</b> | NM_199256        | Sec61 alpha 1 subunit ( <i>S. cerevisiae</i> )                                                |
| Sema6a_predicted   | <b>0.65</b> | <b>0.01</b> | XM_341612        | sema domain, transmembrane domain (TM), and cytoplasmic domain, (semaphorin) 6A (predicted)   |
| Sema7a_predicted   | <b>0.56</b> | <b>0.00</b> | XM_243863        | sema domain, immunoglobulin domain (Ig), and GPI membrane anchor, (semaphorin) 7A (predicted) |
| Sephs2             | <b>0.60</b> | <b>0.01</b> | XM_219347        | selenophosphate synthetase 2                                                                  |
| Sept8_predicted    | <b>0.50</b> | <b>0.00</b> | XM_220423        | septin 8 (predicted)                                                                          |
| Sh2bpsm1           | <b>0.66</b> | <b>0.01</b> | NM_134456        | SH2-B PH domain containing signaling mediator 1                                               |
| Sh3bp1             | <b>0.58</b> | <b>0.00</b> | XM_235500        | reg I binding protein I                                                                       |
| Sh3gl1             | <b>0.61</b> | <b>0.01</b> | NM_031239        | SH3-domain GRB2-like 1                                                                        |
| Sh3gl2             | <b>0.54</b> | <b>0.00</b> | XM_342857        | SH3-domain GRB2-like 2                                                                        |
| Sirt2              | <b>0.57</b> | <b>0.01</b> | NM_00100836<br>8 | sirtuin (silent mating type information regulation 2 homolog) 2 ( <i>S. cerevisiae</i> )      |
| Slc17a7            | <b>0.49</b> | <b>0.00</b> | NM_053859        | solute carrier family 17 (sodium-dependent inorganic phosphate cotransporter), member 7       |
| Slc22a3            | <b>0.38</b> | <b>0.04</b> | NM_019230        | solute carrier family 22, member 3                                                            |
| Slc24a2            | <b>0.56</b> | <b>0.01</b> | NM_031743        | solute carrier family 24 (sodium/potassium/calcium exchanger), member 2                       |
| Slc25a1            | <b>0.59</b> | <b>0.00</b> | NM_017307        | solute carrier family 25, member 1, nuclear gene encoding mitochondrial protein, mRNA         |
| Slc25a12_predicted | <b>0.44</b> | <b>0.04</b> | XM_342445        | solute carrier family 25 (mitochondrial carrier, Aralar), member 12 (predicted)               |
| Slc2a8             | <b>0.61</b> | <b>0.01</b> | NM_053494        | solute carrier family 2, (facilitated glucose transporter) member 8                           |
| Slc38a1            | <b>0.61</b> | <b>0.00</b> | NM_138832        | solute carrier family 38, member 1                                                            |
| Slc4a2             | <b>0.41</b> | <b>0.03</b> | NM_017048        | solute carrier family 4, member 2                                                             |
| Slc7a5             | <b>0.52</b> | <b>0.00</b> | NM_017353        | solute carrier family 7 (cationic amino acid transporter, $\gamma^+$ system), member 5        |
| Slc9a3             | <b>0.65</b> | <b>0.03</b> | NM_012654        | solute carrier family 9 (sodium/hydrogen                                                      |

|                   |             |             |              |                                                                                                               |
|-------------------|-------------|-------------|--------------|---------------------------------------------------------------------------------------------------------------|
|                   |             |             |              | exchanger), member 3                                                                                          |
| Slc9a3r1          | <b>0.60</b> | <b>0.01</b> | NM_021594    | solute carrier family 9 (sodium/hydrogen exchanger), isoform 3 regulator 1                                    |
| Smardc1_predicted | <b>0.40</b> | <b>0.04</b> | XM_343332    | SWI/SNF related, matrix associated, actin dependent regulator of chromatin, subfamily d, member 1 (predicted) |
| Smug1             | <b>0.60</b> | <b>0.02</b> | NM_177934    | single-strand selective monofunctional uracil DNA glycosylase                                                 |
| Snape2            | <b>0.43</b> | <b>0.00</b> | NM_001013121 | small nuclear RNA activating complex, polypeptide 2                                                           |
| Snip              | <b>0.60</b> | <b>0.01</b> | NM_019378    | SNAP25-interacting protein                                                                                    |
| Snta1             | <b>0.54</b> | <b>0.00</b> | XM_342548    | syntrophin, acidic 1                                                                                          |
| Snx25             | <b>0.48</b> | <b>0.01</b> | XM_224863    | sorting nexin 25                                                                                              |
| Snx27             | <b>0.50</b> | <b>0.00</b> | NM_152847    | sorting nexin family member 27                                                                                |
| Son               | <b>0.53</b> | <b>0.02</b> | XM_221656    | Son cell proliferation protein                                                                                |
| Sox21_predicted   | <b>0.60</b> | <b>0.00</b> | XM_224521    | SRY-box containing gene 21 (predicted)                                                                        |
| Sox5              | <b>0.63</b> | <b>0.01</b> | XM_342784    | SRY-box containing gene 5                                                                                     |
| Spag9_predicted   | <b>0.55</b> | <b>0.01</b> | XM_340879    | sperm associated antigen 9 (predicted)                                                                        |
| Spata6            | <b>0.64</b> | <b>0.04</b> | NM_134392    | spermatogenesis associated 6                                                                                  |
| Spnb4             | <b>0.55</b> | <b>0.00</b> | XM_218364    | spectrin beta 4                                                                                               |
| Spock1            | <b>0.64</b> | <b>0.02</b> | XM_225160    | sparc/osteonectin, cwcv and kazal-like domains proteoglycan 1                                                 |
| Spon1             | <b>0.53</b> | <b>0.00</b> | NM_172067    | spondin 1                                                                                                     |
| Sqstm1            | <b>0.58</b> | <b>0.04</b> | NM_181550    | sequestosome 1, transcript variant 2                                                                          |
| Srebf2_predicted  | <b>0.43</b> | <b>0.05</b> | NM_001033694 | sterol regulatory element binding factor 2 (predicted)                                                        |
| Stim2_predicted   | <b>0.54</b> | <b>0.02</b> | XM_223454    | stromal interaction molecule 2 (predicted)                                                                    |
| Stip1             | <b>0.57</b> | <b>0.00</b> | NM_138911    | stress-induced phosphoprotein 1                                                                               |
| Stk25             | <b>0.64</b> | <b>0.00</b> | NM_184049    | serine/threonine kinase 25 (STE20 homolog, yeast)                                                             |
| Stx5a             | <b>0.56</b> | <b>0.04</b> | NM_031704    | syntaxin 5a                                                                                                   |
| Sulf2             | <b>0.55</b> | <b>0.03</b> | XM_230861    | sulfatase 2                                                                                                   |
| Supt6h            | <b>0.57</b> | <b>0.01</b> | XM_239258    | suppressor of Ty 6 homolog (S. cerevisiae)                                                                    |
| Syp               | <b>0.52</b> | <b>0.00</b> | NM_012664    | synaptophysin                                                                                                 |
| Syt3              | <b>0.49</b> | <b>0.00</b> | NM_019122    | synaptotagmin III                                                                                             |
| Tbx2_predicted    | <b>0.46</b> | <b>0.03</b> | XM_220810    | T-box 2 (predicted)                                                                                           |
| Tbx4_predicted    | <b>0.60</b> | <b>0.05</b> | XM_220811    | T-box 4 (predicted)                                                                                           |
| TC537677          | <b>0.66</b> | <b>0.00</b> | TC537677     | Chimerin (Chimaerin) 2, partial (33%)                                                                         |
| Tcf20_mapped      | <b>0.35</b> | <b>0.04</b> | XM_345861    | transcription factor 20 (mapped)                                                                              |
| Tcfef             | <b>0.59</b> | <b>0.00</b> | NM_001025707 | transcription factor EB                                                                                       |

|                      |             |             |                  |                                                                                                             |
|----------------------|-------------|-------------|------------------|-------------------------------------------------------------------------------------------------------------|
| Tdh_predicted        | <b>0.29</b> | <b>0.02</b> | XM_214217        | L-threonine dehydrogenase (predicted)                                                                       |
| Terf2_predicted      | <b>0.64</b> | <b>0.00</b> | XM_341683        | telomeric repeat binding factor 2 (predicted)                                                               |
| Tfpt                 | <b>0.45</b> | <b>0.00</b> | NM_138870        | TCF3 (E2A) fusion partner                                                                                   |
| Tjp3_predicted       | <b>0.39</b> | <b>0.03</b> | XM_234924        | tight junction protein 3 (predicted)                                                                        |
| Tm9sf1               | <b>0.60</b> | <b>0.00</b> | NM_00101215<br>5 | transmembrane 9 superfamily member 1                                                                        |
| Tom1                 | <b>0.45</b> | <b>0.01</b> | NM_00100836<br>5 | target of myb1 homolog (chicken)                                                                            |
| Tp53                 | <b>0.65</b> | <b>0.00</b> | NM_030989        | tumor protein p53                                                                                           |
| Tpd52_predicte<br>d  | <b>0.65</b> | <b>0.00</b> | XM_215524        | tumor protein D52 (predicted)                                                                               |
| Tpst2                | <b>0.61</b> | <b>0.00</b> | NM_00100850<br>8 | tyrosylprotein sulfotransferase 2                                                                           |
| Tpx2_predicted       | <b>0.42</b> | <b>0.05</b> | XM_230735        | TPX2, microtubule-associated protein homolog (Xenopus laevis) (predicted)                                   |
| Treh                 | <b>0.53</b> | <b>0.03</b> | XM_343380        | trehalase (brush-border membrane glycoprotein)                                                              |
| Trim28               | <b>0.42</b> | <b>0.00</b> | AI178993         | cDNA clone RSPCA16 3'                                                                                       |
| Trim3                | <b>0.35</b> | <b>0.00</b> | NM_031786        | tripartite motif protein 3                                                                                  |
| Trim32               | <b>0.65</b> | <b>0.00</b> | NM_00101210<br>3 | tripartite motif protein 32                                                                                 |
| Trpc4ap              | <b>0.39</b> | <b>0.00</b> | XM_342553        | transient receptor potential cation channel, subfamily C, member 4 associated protein, transcript variant 2 |
| Ttc3_predicted       | <b>0.47</b> | <b>0.03</b> | XM_340973        | tetratricopeptide repeat domain 3 (predicted)                                                               |
| Tyro3                | <b>0.59</b> | <b>0.00</b> | NM_017092        | TYRO3 protein tyrosine kinase 3                                                                             |
| Ubd                  | <b>0.43</b> | <b>0.01</b> | NM_053299        | ubiquitin D                                                                                                 |
| Uble1b               | <b>0.57</b> | <b>0.01</b> | XM_218502        | ubiquitin-like 1 (sentrin) activating enzyme E1B                                                            |
| Ubqln4_predicte<br>d | <b>0.47</b> | <b>0.01</b> | XM_227405        | ubiquilin 4 (predicted)                                                                                     |
| Ubtf                 | <b>0.65</b> | <b>0.00</b> | XM_340913        | upstream binding transcription factor, RNA polymerase I                                                     |
| Unc84a               | <b>0.50</b> | <b>0.00</b> | NM_00100714<br>7 | unc-84 homolog A (C. elegans)                                                                               |
| Ung                  | <b>0.54</b> | <b>0.00</b> | NM_00101312<br>4 | uracil-DNA glycosylase                                                                                      |
| Usp5_predicted       | <b>0.63</b> | <b>0.03</b> | XM_238380        | ubiquitin specific protease 5 (isopeptidase T) (predicted)                                                  |
| Vapb                 | <b>0.46</b> | <b>0.03</b> | NM_021847        | vesicle-associated membrane protein, associated protein B and C                                             |
| Vars2                | <b>0.58</b> | <b>0.01</b> | XM_00107661<br>6 | valyl-tRNA synthetase 2                                                                                     |
| Vil2                 | <b>0.58</b> | <b>0.04</b> | NM_019357        | villin 2                                                                                                    |
| Vps11_predicte       | <b>0.32</b> | <b>0.00</b> | XM_236189        | vacuolar protein sorting 11 (yeast) (predicted)                                                             |

|                   |             |             |              |                                                                                             |
|-------------------|-------------|-------------|--------------|---------------------------------------------------------------------------------------------|
| d                 |             |             |              |                                                                                             |
| Vps33a            | <b>0.48</b> | <b>0.00</b> | NM_022961    | vacuolar protein sorting 33A (yeast)                                                        |
| Vps33b            | <b>0.54</b> | <b>0.00</b> | NM_022286    | vacuolar protein sorting 33B (yeast)                                                        |
| Vps72_predicted   | <b>0.64</b> | <b>0.00</b> | XM_227428    | vacuolar protein sorting 72 (yeast) (predicted)                                             |
| Wbscr16_predicted | <b>0.53</b> | <b>0.00</b> | XM_341066    | Williams-Beuren syndrome chromosome region 16 homolog (human) (predicted)                   |
| Wbscr21           | <b>0.58</b> | <b>0.00</b> | XM_341104    | Williams Beuren syndrome chromosome region 21                                               |
| Wdr5              | <b>0.61</b> | <b>0.00</b> | NM_001039034 | WD repeat domain 5                                                                          |
| Whsc111_predicted | <b>0.48</b> | <b>0.04</b> | XM_214371    | Wolf-Hirschhorn syndrome candidate 1-like 1 (predicted)                                     |
| Wsb2              | <b>0.57</b> | <b>0.00</b> | NM_001007616 | WD repeat and SOCS box-containing 2                                                         |
| Xab2              | <b>0.51</b> | <b>0.00</b> | NM_139109    | XPA binding protein 2                                                                       |
| XM_213470         | <b>0.47</b> | <b>0.05</b> | XM_213470    | similar to type I intermediate filament cytokeratin                                         |
| XM_214361         | <b>0.59</b> | <b>0.01</b> | XM_214361    | similar to WRN type I                                                                       |
| XM_217407         | <b>0.57</b> | <b>0.03</b> | XM_217407    | similar to NIF3L1                                                                           |
| XM_217851         | <b>0.61</b> | <b>0.01</b> | XM_217851    | similar to sif and Tiam1-like exchange factor                                               |
| XM_223739         | <b>0.63</b> | <b>0.02</b> | XM_223739    | similar to Diacylglycerol kinase, theta (Diglyceride kinase) (DGK-theta) (DAG kinase theta) |
| XM_230900         | <b>0.43</b> | <b>0.00</b> | XM_230900    | similar to nuclear DNA binding factor                                                       |
| XM_235679         | <b>0.32</b> | <b>0.00</b> | XM_235679    | similar to keratin type II, hair (b4) - mouse                                               |
| XM_236187         | <b>0.65</b> | <b>0.01</b> | XM_236187    | similar to MBD2 (methyl-CpG-binding protein)-interacting zinc finger protein                |
| XM_237097         | <b>0.54</b> | <b>0.01</b> | XM_237097    | similar to RIKEN cDNA 2310066K2                                                             |
| XM_341008         | <b>0.59</b> | <b>0.00</b> | XM_341008    | similar to hypothetical protein MGC21688                                                    |
| XM_343572         | <b>0.55</b> | <b>0.00</b> | XM_343572    | similar to basic leucine zipper and W2 domains 1                                            |
| XM_344175         | <b>0.63</b> | <b>0.00</b> | XM_344175    | similar to phosphoprotein enriched in astrocytes 15                                         |
| Xpo6              | <b>0.64</b> | <b>0.01</b> | XM_574559    | exportin 6                                                                                  |
| XRG4              | <b>0.63</b> | <b>0.01</b> | NM_001011971 | XK-related protein 4                                                                        |
| Zbtb5_predicted   | <b>0.55</b> | <b>0.02</b> | XM_233005    | zinc finger and BTB domain containing 5 (predicted)                                         |
| Zdhhc18           | <b>0.28</b> | <b>0.00</b> | NM_001039339 | zinc finger, DHHC domain containing 18                                                      |
| Zfp13_predicted   | <b>0.48</b> | <b>0.00</b> | XM_220197    | zinc finger protein 13 (predicted)                                                          |
| Zfp289            | <b>0.60</b> | <b>0.00</b> | NM_001033707 | zinc finger protein 289                                                                     |



|                  |             |             |              |                                                           |
|------------------|-------------|-------------|--------------|-----------------------------------------------------------|
| Znf251_predicted | <b>0.65</b> | <b>0.01</b> | XM_345851    | zinc finger protein 251 (predicted)                       |
| Znf532_predicted | <b>0.30</b> | <b>0.03</b> | XM_225923    | zinc finger protein 532 (predicted)                       |
| Zw10             | <b>0.59</b> | <b>0.04</b> | NM_001024801 | ZW10 homolog, centromere/kinetochore protein (Drosophila) |
| Zyg11bl          | <b>0.52</b> | <b>0.00</b> | XM_242300    | zyg-11 homolog B (C. elegans)-like, transcript variant 2  |

**Supplemental Table 5:** List of Taqman primers used for quantitative PCR (qPCR). Shown in the table is the list of taqman assays used for qPCR validation of microarray results.

| <b>Taqman Assay ID</b> | <b>Gene Symbol</b> | <b>Gene Name</b>                                                                    |
|------------------------|--------------------|-------------------------------------------------------------------------------------|
| Hs99999901_s1          | 18S                | 18 s RNA                                                                            |
| Rn00667869_m1          | Actb               | beta actin                                                                          |
| Rn00565393_m1          | Adrb3              | adrenergic receptor, beta 3                                                         |
| Rn01510663_g1          | Art5               | ADP-ribosyltransferase 5                                                            |
| Rn00788224_m1          | Camk1g             | calcium/calmodulin-dependent protein kinase I gamma                                 |
| Rn99999916_s1          | Gapdh              | glyceraldehyde-3-phosphate dehydrogenase                                            |
| Rn00821225_g1          | Gnb1               | guanine nucleotide binding protein (G protein), beta 1                              |
| Rn00575638_m1          | Grin2d             | glutamate receptor, ionotropic, N-methyl D-aspartate 2D                             |
| Rn01527840_m1          | Hprt1              | hypoxanthine-Guanine Phosphoribosyl Transferase 1                                   |
| Rn01468302_m1          | Htr2a              | 5-hydroxytryptamine (serotonin) receptor 2A                                         |
| Rn00562748_m1          | Htr2c              | 5-hydroxytryptamine (serotonin) receptor 2C                                         |
| Rn00583189_m1          | Impa1              | inositol (myo)-1(or 4)-monophosphatase 1                                            |
| Rn00570552_s1          | Kcna3              | potassium voltage-gated channel, shaker-related subfamily, member 3                 |
| Rn00588515_m1          | Kcnh2              | potassium voltage-gated channel, subfamily H (eag-related), member 2                |
| Rn00590940_m1          | Kcnh7              | potassium voltage-gated channel, subfamily H (eag-related), member 7                |
| Rn00587892_m1          | Nlgn1              | neuroligin 1                                                                        |
| Rn00566855_m1          | Ppp3ca             | protein phosphatase 3, catalytic subunit, alpha isoform                             |
| Rn00572597_g1          | Ppp3r2             | protein phosphatase 3, regulatory subunit B, alpha isoform (calcineurin B, type II) |
| Rn00709830_m1          | Tnfrsf1b           | tumor necrosis factor receptor superfamily, member 1b                               |

**Supplemental Table 6:** List of SYBR green primers used for quantitative PCR (qPCR). Shown in the table is the list of SYBR Green primers used for qPCR validation of microarray results.

| <b>Gene Name</b>                                                     | <b>Gene Symbol</b> | <b>Primer sequence (F- forward; R-reverse)</b>        |
|----------------------------------------------------------------------|--------------------|-------------------------------------------------------|
| 18 s RNA                                                             | 18S                | F- TTTCGAGGCCCTGTAATTGG<br>R - CCCAAGATCCAACCTACGAGC  |
| adrenergic receptor, beta 3                                          | Adrb3              | F- AGCAAGGAGCCTGACTTCTG<br>R - CCTGGGAACCTCACTCTGAGC  |
| calcium/calmodulin-dependent protein kinase I gamma                  | Camk1g             | F - GCCATCTGCTTGAGAAGGAC<br>R - ATCTGGAGGCTGACAGATGG  |
| glyceraldehyde-3-phosphate dehydrogenase                             | Gapdh              | F - TTCTTGTGCAGTGCCAGCC<br>R – AGAGAAGGCAGCCCTGGTAAC  |
| guanine nucleotide binding protein (G protein), beta 1               | Gnb1               | F - AATGCGAACCCAGGAGAACAC<br>R – TGGCATGAACCTTGTTTGTG |
| hypoxanthine-Guanine Phosphoribosyl Transferase 1                    | Hprt1              | F – GCAGACTTTGCTTTCCTTGG<br>R – GTCTGGCCTGTATCCAACACT |
| inositol (myo)-1(or 4)-monophosphatase 1                             | Impa1              | F - CAACTTTGTGCACCGGTTTC<br>R – CCGAAGCTTCTGACCGTTAC  |
| potassium voltage-gated channel, subfamily H (eag-related), member 2 | Kcnh2              | F - CCACAATGTCACCGAGAAGG<br>R – AGAATGAGCCAGTCCCACAC  |
| neuroligin 1                                                         | Nlgn1              | F - GAGGGAGATAGACCCACAGC<br>R – ATGCCGGATCTTCAATCATC  |
| tumor necrosis factor receptor superfamily, member 1b                | Tnfrsf1b           | F - GACTGGCGAACTGCTTCATC<br>R - CTGGGTGCTGTGGTCAATAG  |
